# Supplementary material for: Identification of specific DNA methylation sites on the Y-chromosome as biomarker in prostate cancer
Source: PubMed Central journal article supplement (PMC4747356; doi:10.18632/oncotarget.6141), 2015-10-16

| <b>Sample ID.</b> | <b>Sample</b> | <b>Pathology</b> | <b>Sample ID.</b> | <b>Sample</b> | <b>Pathology</b> |
|-------------------|---------------|------------------|-------------------|---------------|------------------|
| 5                 | 841544-5      | BPH              | 48                | 911148        | PCa              |
| 6                 | 914889-1      | BPH              | 49                | 906518        | PCa              |
| 7                 | 915438-4      | BPH              | 50                | 913192        | PCa              |
| 8                 | 915085-2      | BPH              | 51                | 907942        | PCa              |
| 9                 | 652150-6      | BPH              | 52                | 589342        | PCa              |
| 11                | 915418-3      | BPH              | 53                | 905407        | PCa              |
| 12                | 914884-7      | BPH              | 54                | 709085        | PCa              |
| 13                | 914733-8      | BPH              | 55                | 908370        | PCa              |
| 17                | 909973        | BPH              | 103               | 903823        | PCa              |
| 18                | 914356        | BPH              | 111               | 897442        | PCa              |
| 19                | 913694        | BPH              | 112               | 901045        | PCa              |
| 20                | 903268        | BPH              | 113               | 901043        | PCa              |
| 21                | 908210        | BPH              | 114               | 902018        | PCa              |
| 22                | 910531        | BPH              | 136               | 791724        | PCa              |
| 23                | 908682        | BPH              | 150               | 887515        | PCa              |
| 24                | 907033        | BPH              | 151               | 885709        | PCa              |
| 56                | 912473        | BPH              | 152               | 889652        | PCa              |
| 57                | 910231        | BPH              | 154               | 888371        | PCa              |
| 58                | 912391        | BPH              | 161               | 883873        | PCa              |
| 59                | 910991        | BPH              | 165               | 883888        | PCa              |
| 60                | 908362        | BPH              | 166               | 880629        | PCa              |
| 61                | 914729        | BPH              | 167               | 883874        | PCa              |
| 62                | 757418        | BPH              | 178               | 887518        | PCa              |
| 63                | 909223        | BPH              | 183               | 916479        | PCa              |
| 64                | 912354        | BPH              | 185               | 916137        | PCa              |
| 65                | 907679        | BPH              | 189               | 916480        | PCa              |
| 66                | 908168        | BPH              | 191               | 916826        | PCa              |
| 67                | 907031        | BPH              | 194               | 917004        | PCa              |
| 68                | 776982        | BPH              | 195               | 917172        | PCa              |
| 69                | 905091        | BPH              | 204               | 917725        | PCa              |
| 70                | K01556        | BPH              | 208               | 917520        | PCa              |
| 71                | 910227        | BPH              | 101               | 903813        | BPH              |
| 72                | 476366        | BPH              | 102               | 903826        | BPH              |
| 73                | 613622        | BPH              | 116               | 462720        | BPH              |
| 74                | 908502        | BPH              | 118               | 906867        | BPH              |
| 75                | 911632        | BPH              | 120               | 905955        | BPH              |
| 76                | 911642        | BPH              | 127               | 905247        | BPH              |
| 77                | 908384        | BPH              | 128               | 904835        | BPH              |
| 1                 | 914012-16     | PCa              | 129               | 904040        | BPH              |
| 2                 | 914352-14     | PCa              | 130               | 904035        | BPH              |
| 3                 | 915077-11     | PCa              | 135               | 897251        | BPH              |
| 4                 | 914886-12     | PCa              | 139               | 895260        | BPH              |
| 10                | 912058-10     | PCa              | 147               | 885889        | BPH              |
| 14                | 915421-9      | PCa              | 148               | 887357        | BPH              |
| 15                | 914727-13     | PCa              | 155               | 889442        | BPH              |
| 16                | 913196-15     | PCa              | 156               | 889796        | BPH              |
| 25                | 904034        | PCa              | 158               | 888377        | BPH              |
| 26                | 910527        | PCa              | 159               | 889068        | BPH              |
| 27                | 906349        | PCa              | 160               | 867509        | BPH              |
| 28                | 912589        | PCa              | 162               | 803101        | BPH              |
| 29                | 913504        | PCa              | 164               | 887506        | BPH              |
| 30                | 911847        | PCa              | 168               | 882798        | BPH              |
| 31                | 447800        | PCa              | 169               | 881699        | BPH              |
| 32                | 913844        | PCa              | 172               | 884431        | BPH              |

---

|    |        |     |     |        |     |
|----|--------|-----|-----|--------|-----|
| 34 | 907486 | PCa | 173 | 885527 | BPH |
| 35 | 903164 | PCa | 177 | 880068 | BPH |
| 36 | 908515 | PCa | 181 | 881507 | BPH |
| 37 | 906318 | PCa | 182 | 916416 | BPH |
| 38 | 903322 | PCa | 184 | 916135 | BPH |
| 39 | 908161 | PCa | 186 | 915632 | BPH |
| 40 | 904834 | PCa | 190 | 916477 | BPH |
| 41 | 905716 | PCa | 192 | 916378 | BPH |
| 42 | 912730 | PCa | 196 | 916682 | BPH |
| 43 | 913288 | PCa | 197 | 726393 | BPH |
| 44 | 907035 | PCa | 198 | 917176 | BPH |
| 45 | 908033 | PCa | 199 | 917739 | BPH |
| 46 | 904211 | PCa | 201 | 917542 | BPH |
| 47 | 913289 | PCa |     |        |     |

---

# Cg05163709

Assay Name: CZ-1  
Sample ID: 5  
Note:

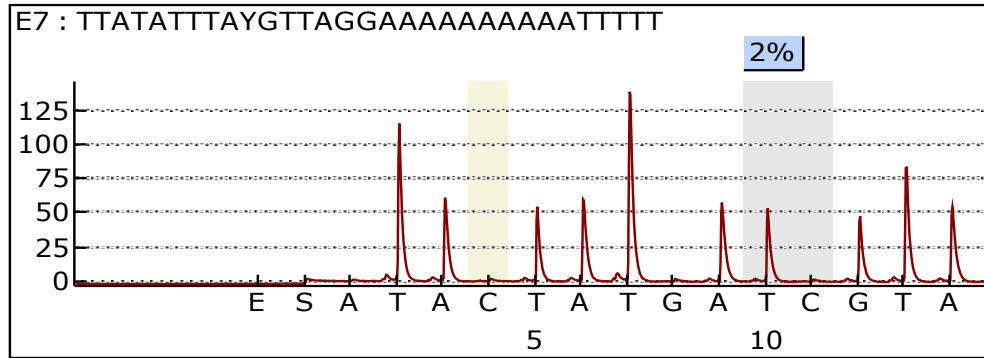

Assay Name: CZ-1  
Sample ID: 6  
Note:

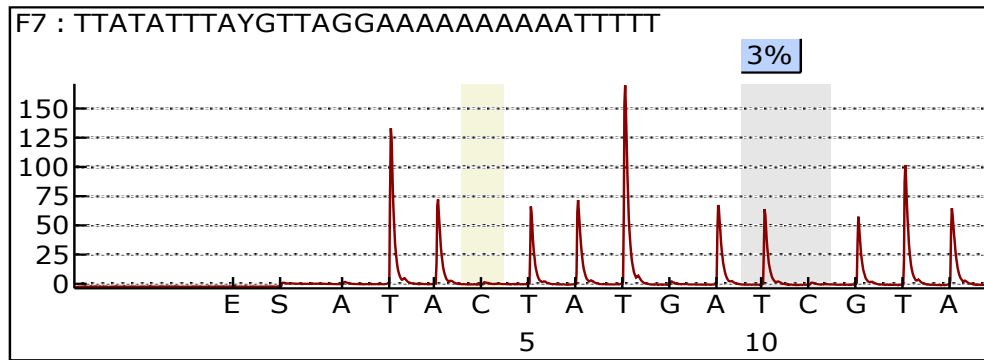

Assay Name: CZ-1  
Sample ID: 7  
Note:

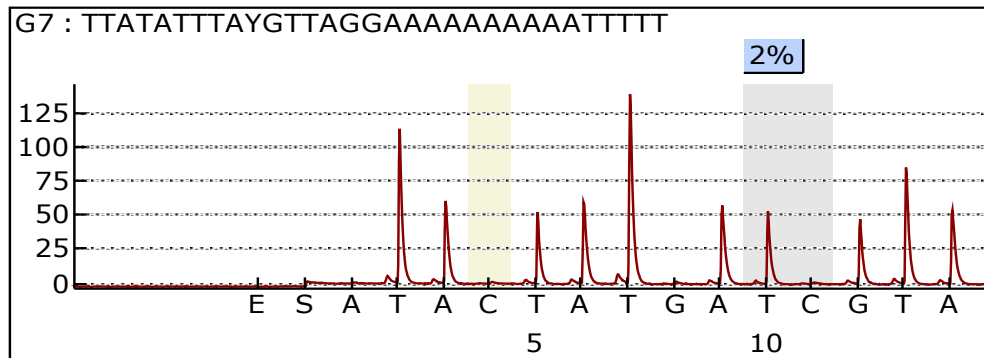

Assay Name: CZ-1  
Sample ID: 8  
Note:

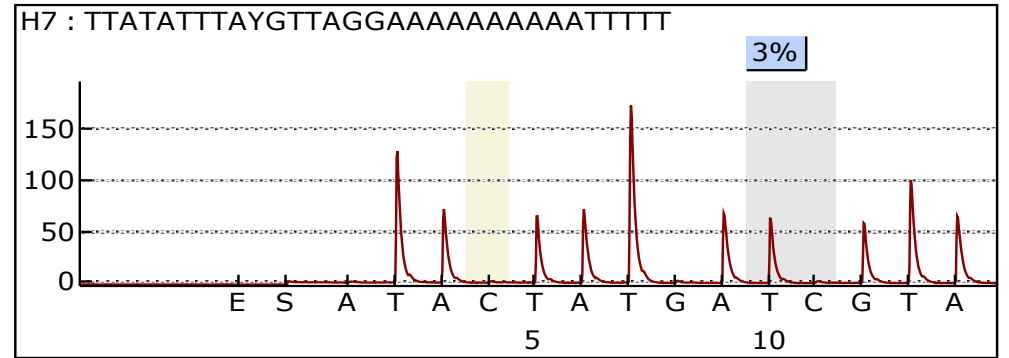

Assay Name: CZ-1  
Sample ID: 9  
Note:

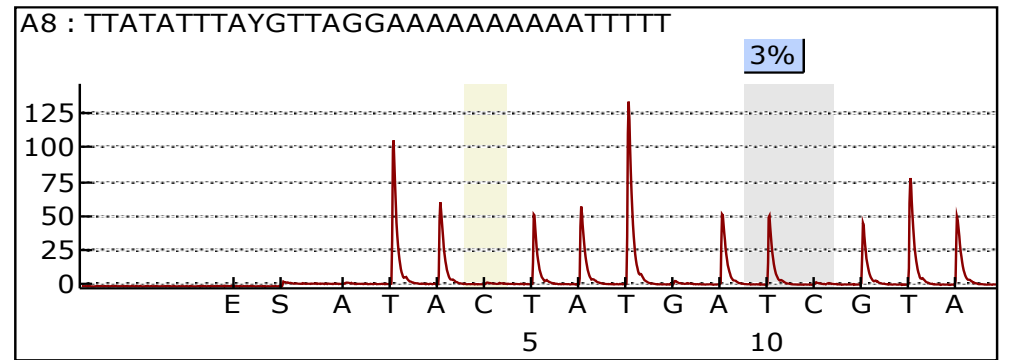

Assay Name: CZ-1  
Sample ID: 11  
Note:

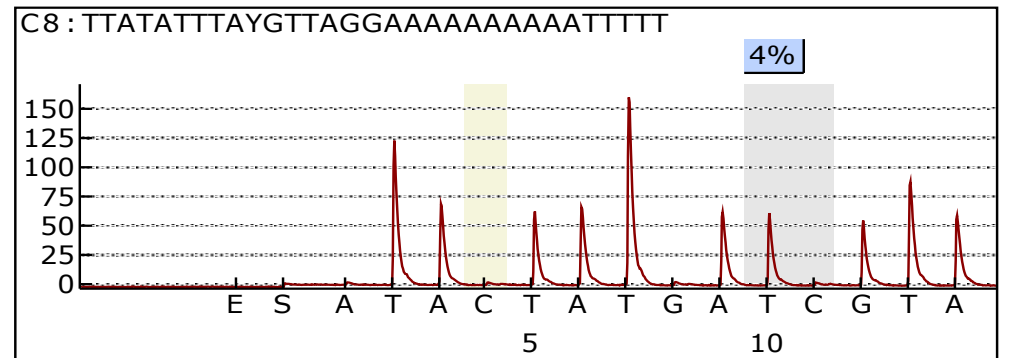

Assay Name: CZ-1  
Sample ID: 12  
Note:

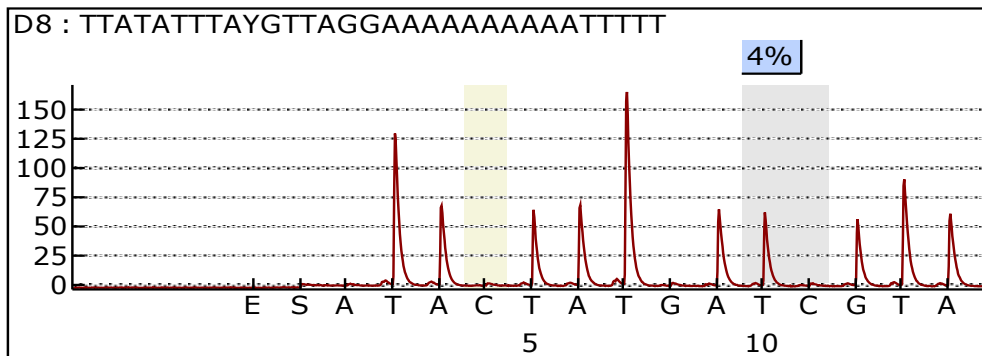

Assay Name: CZ-1  
Sample ID: 18  
Note:

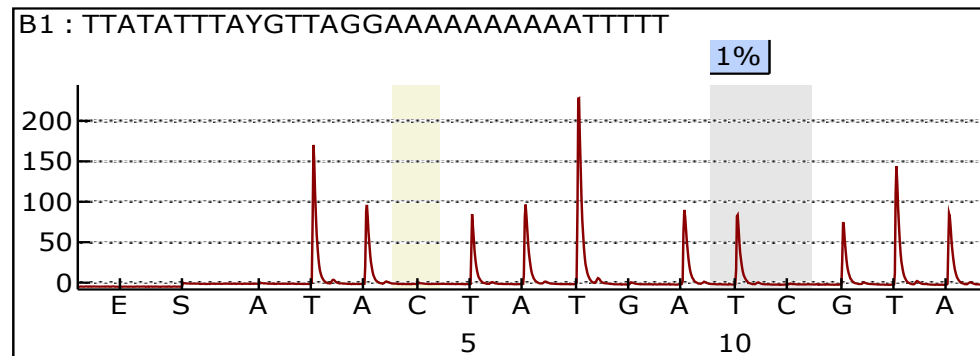

Assay Name: CZ-1  
Sample ID: 13  
Note:

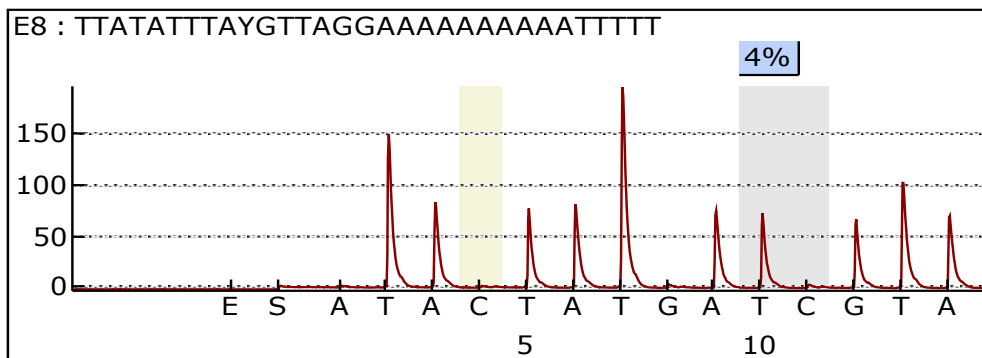

Assay Name: CZ-1  
Sample ID: 19  
Note:

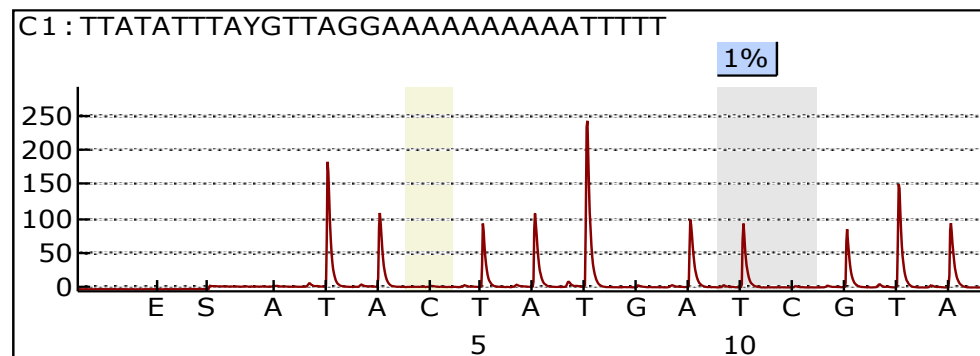

Assay Name: CZ-1  
Sample ID: 17  
Note:

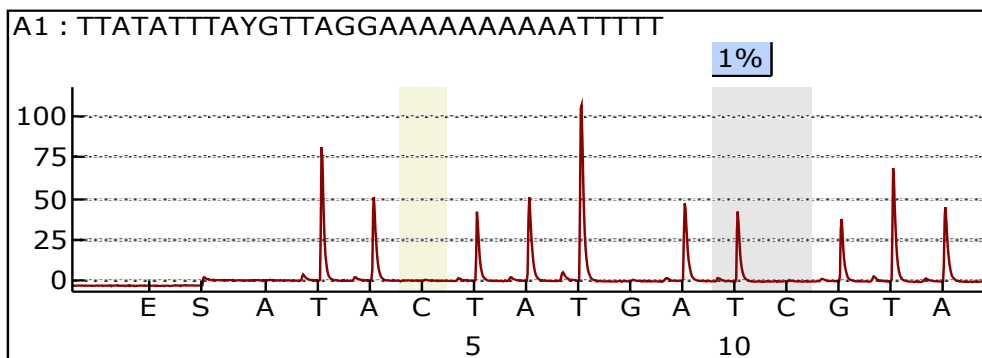

Assay Name: CZ-1  
Sample ID: 20  
Note:

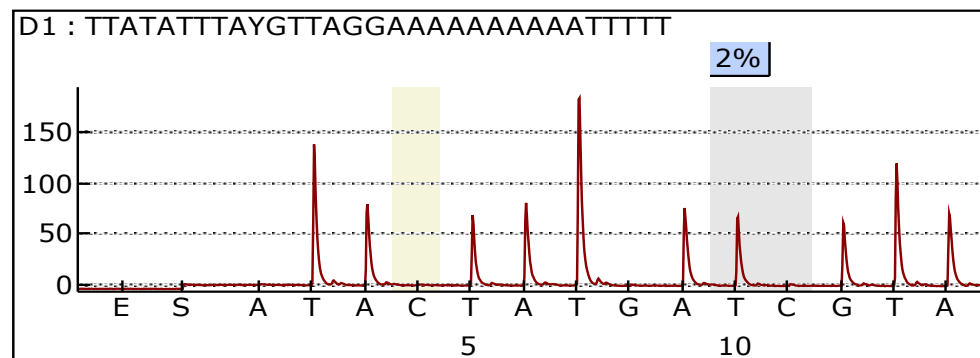

Assay Name: CZ-1  
Sample ID: 21  
Note:

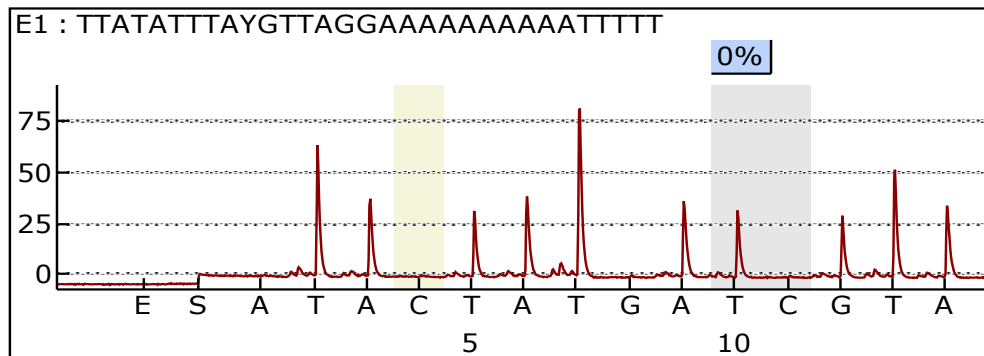

Assay Name: CZ-1  
Sample ID: 24  
Note:

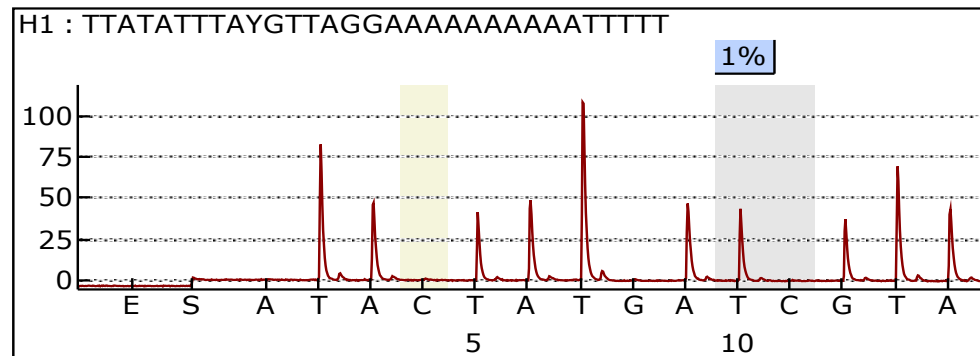

Assay Name: CZ-1  
Sample ID: 22  
Note:

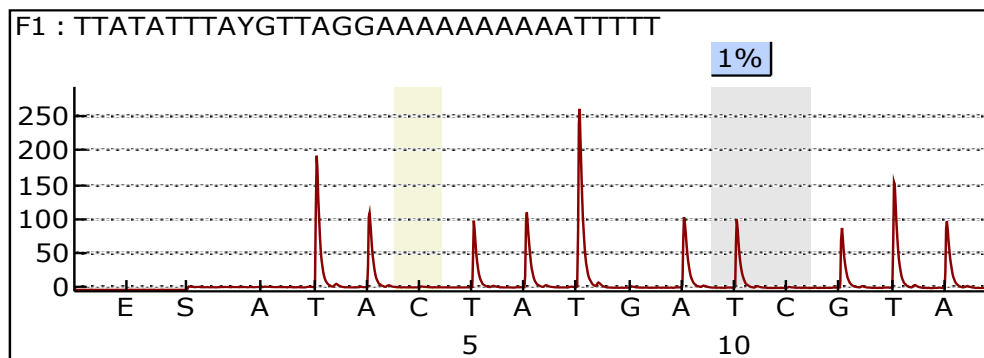

Assay Name: CZ-1  
Sample ID: 56  
Note:

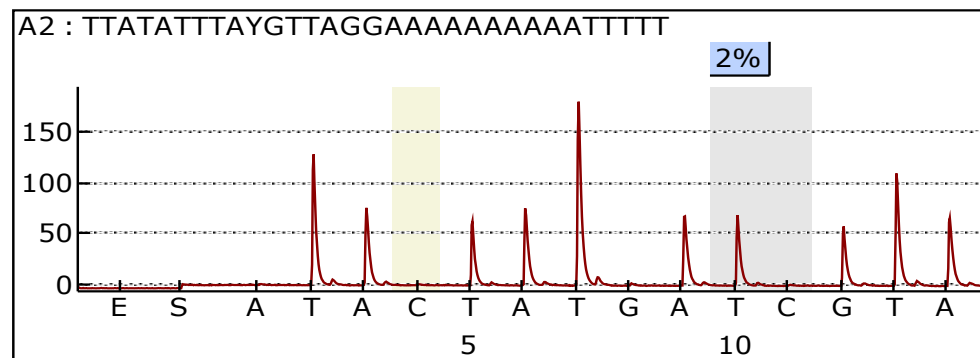

Assay Name: CZ-1  
Sample ID: 23  
Note:

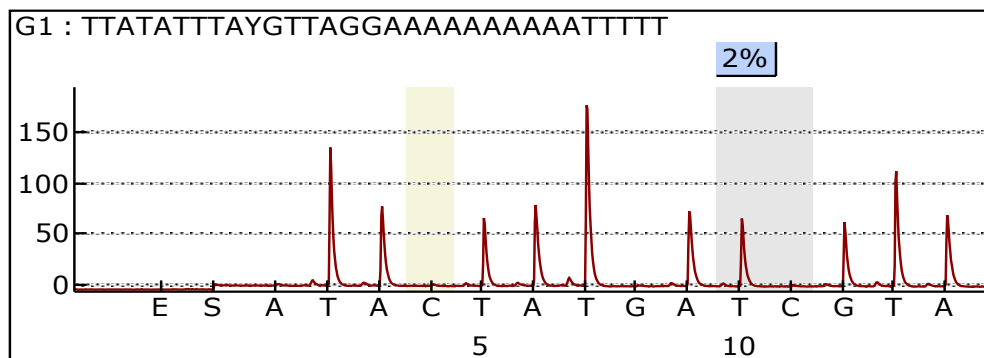

Assay Name: CZ-1  
Sample ID: 57  
Note:

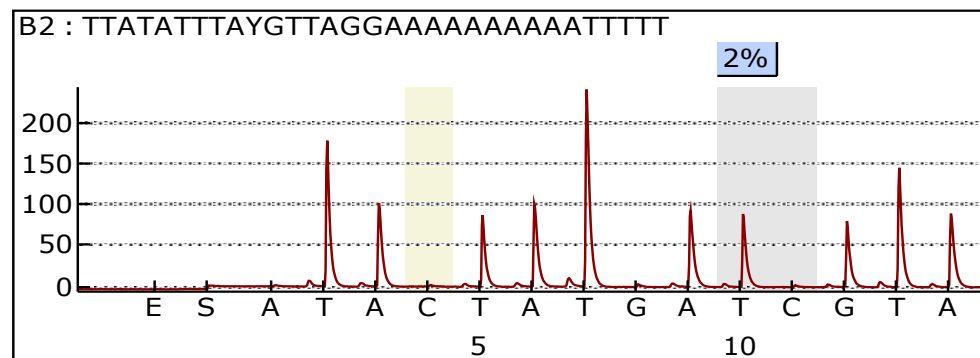

Assay Name: CZ-1  
Sample ID: 58  
Note:

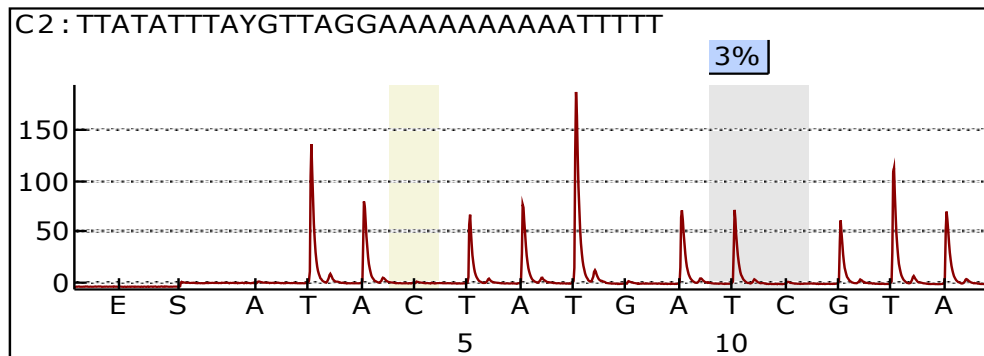

Assay Name: CZ-1  
Sample ID: 61  
Note:

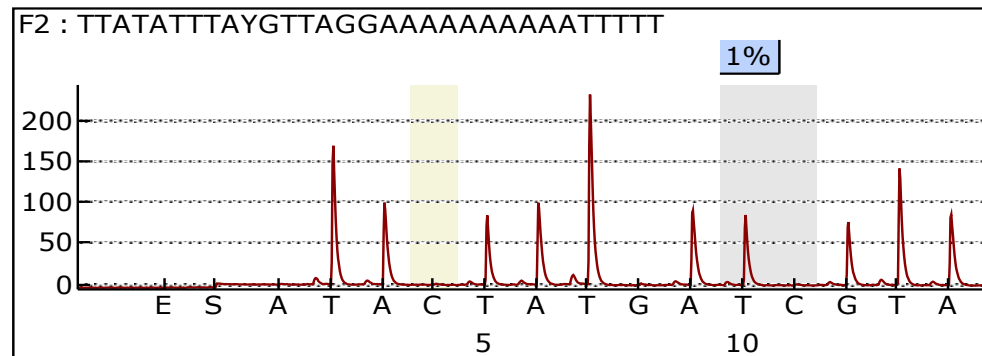

Assay Name: CZ-1  
Sample ID: 59  
Note:

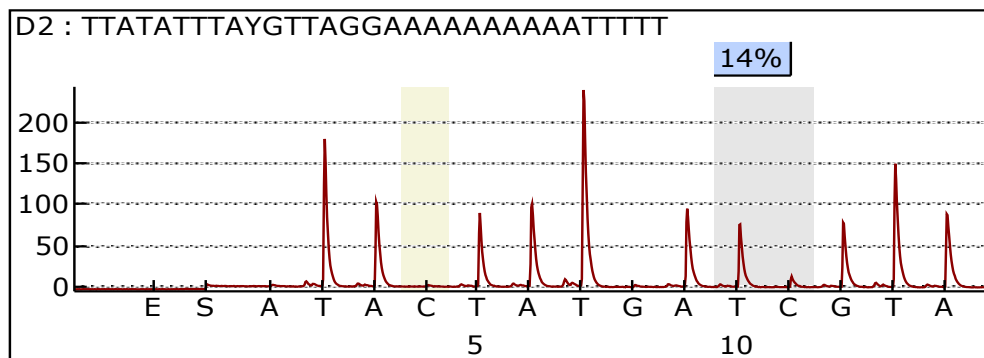

Assay Name: CZ-1  
Sample ID: 62  
Note:

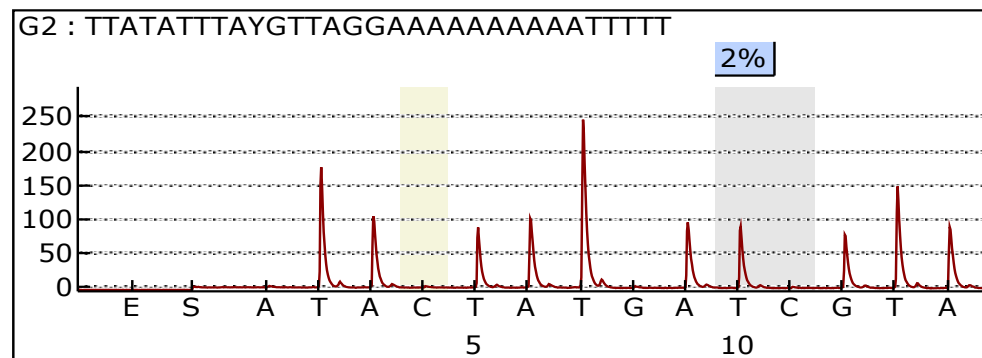

Assay Name: CZ-1  
Sample ID: 60  
Note:

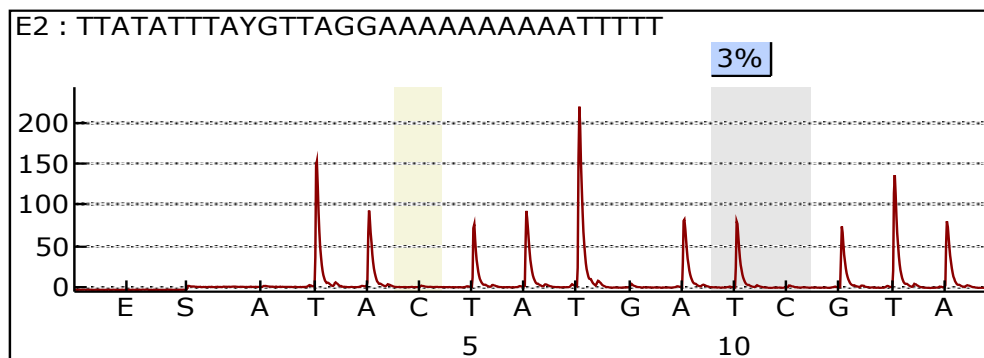

Assay Name: CZ-1  
Sample ID: 63  
Note:

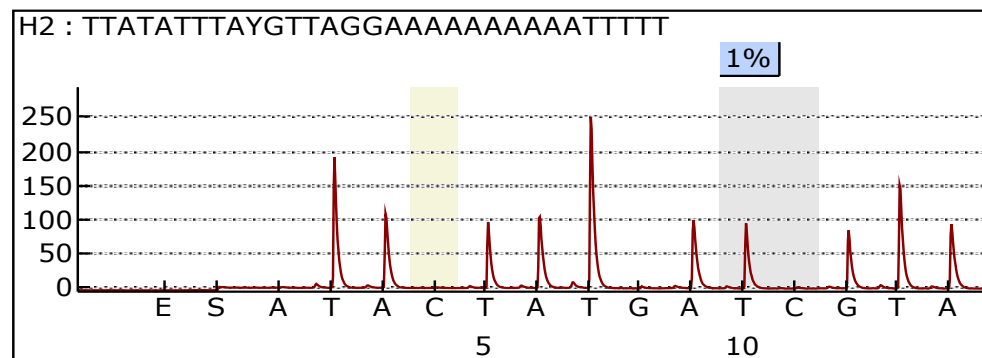

Assay Name: CZ-1  
Sample ID: 64  
Note:

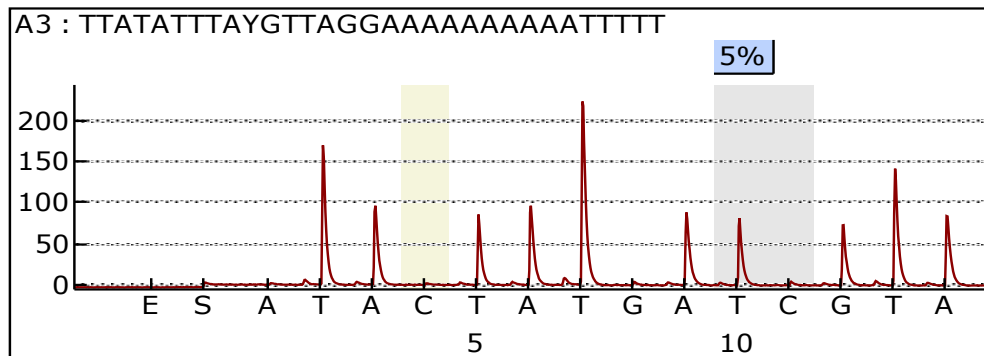

Assay Name: CZ-1  
Sample ID: 67  
Note:

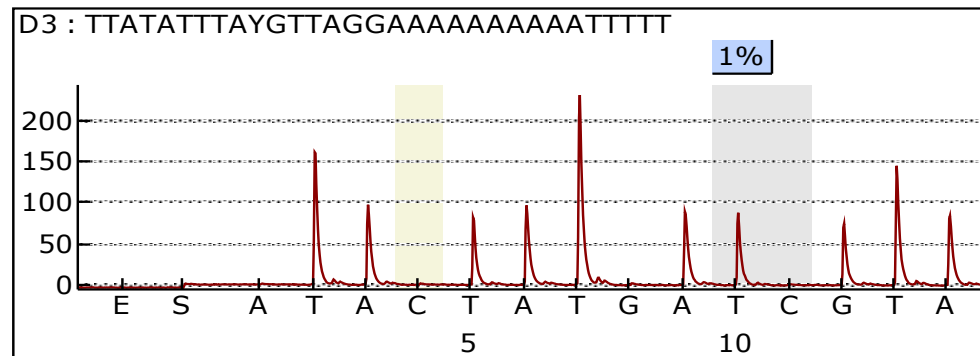

Assay Name: CZ-1  
Sample ID: 65  
Note:

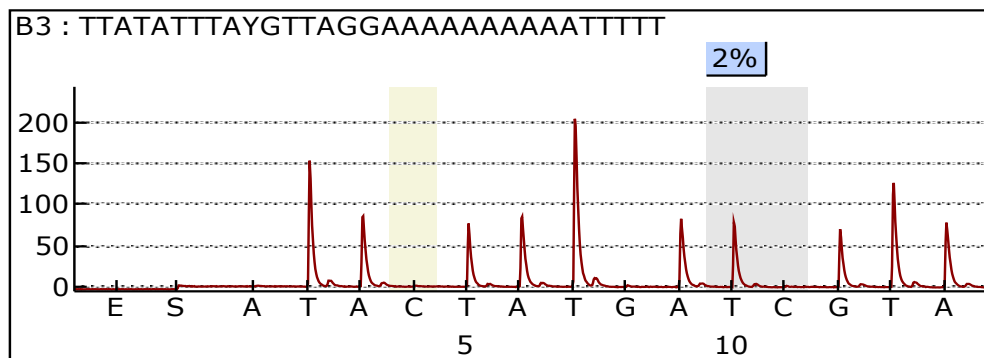

Assay Name: CZ-1  
Sample ID: 68  
Note:

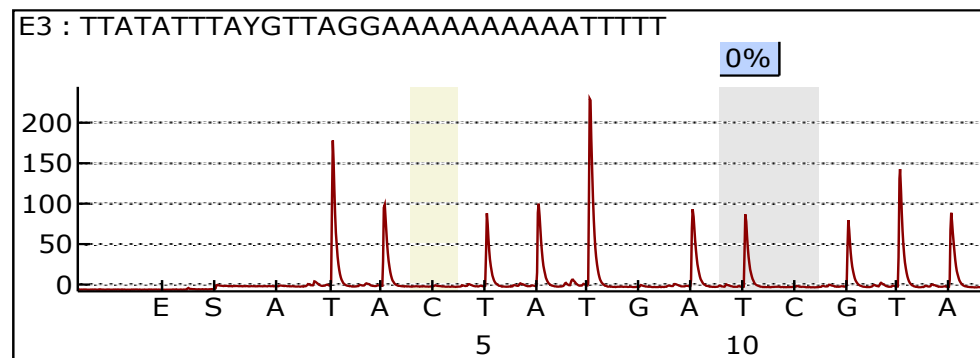

Assay Name: CZ-1  
Sample ID: 66  
Note:

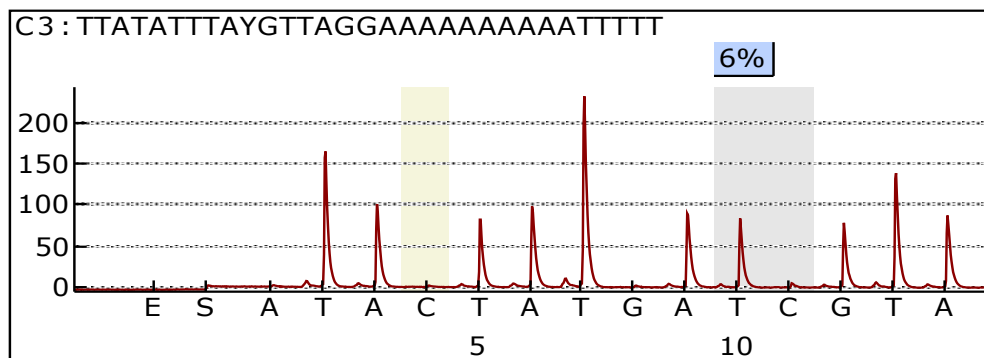

Assay Name: CZ-1  
Sample ID: 69  
Note:

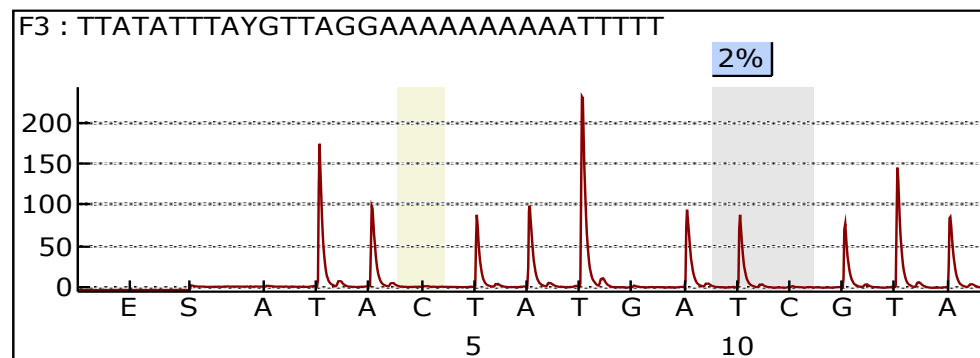

Assay Name: CZ-1  
Sample ID: 70  
Note:

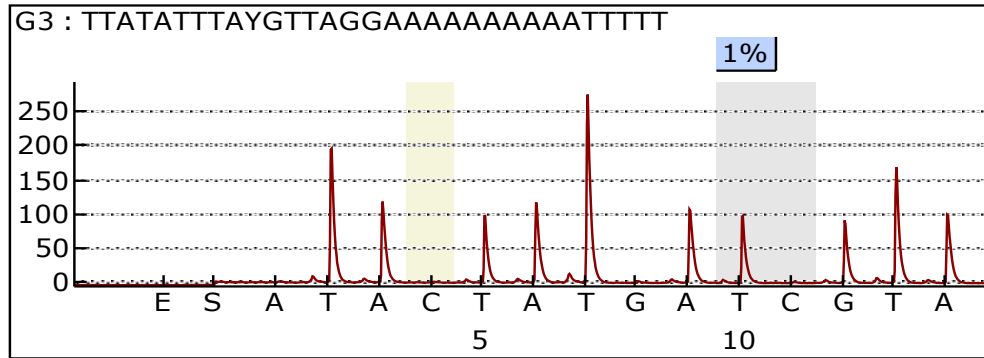

Assay Name: CZ-1  
Sample ID: 73  
Note:

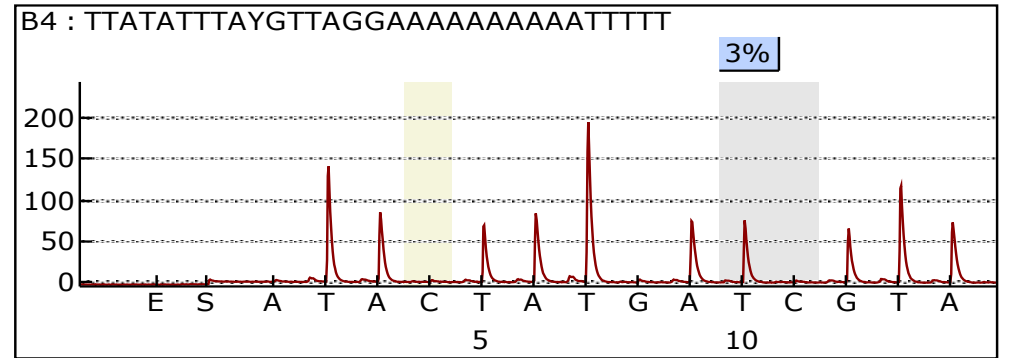

Assay Name: CZ-1  
Sample ID: 71  
Note:

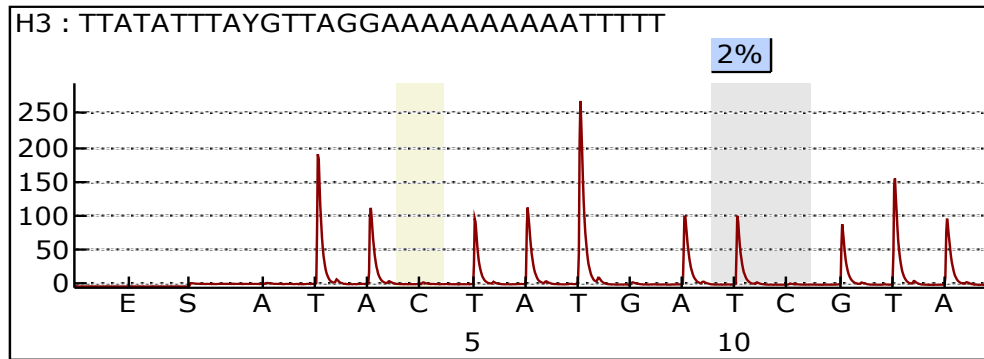

Assay Name: CZ-1  
Sample ID: 74  
Note:

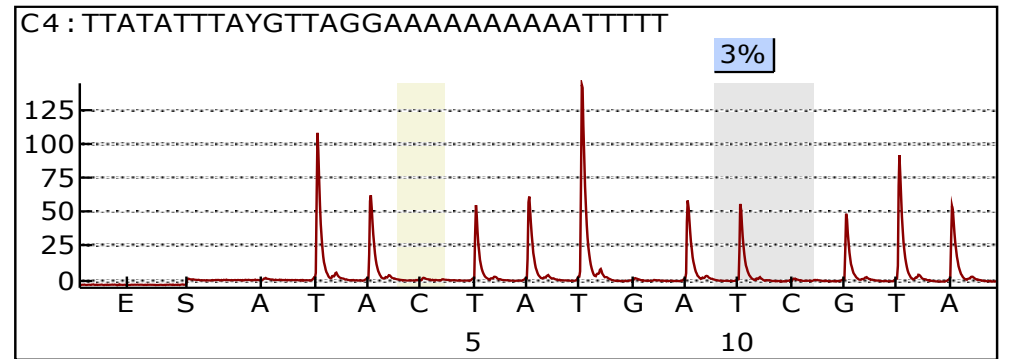

Assay Name: CZ-1  
Sample ID: 72  
Note:

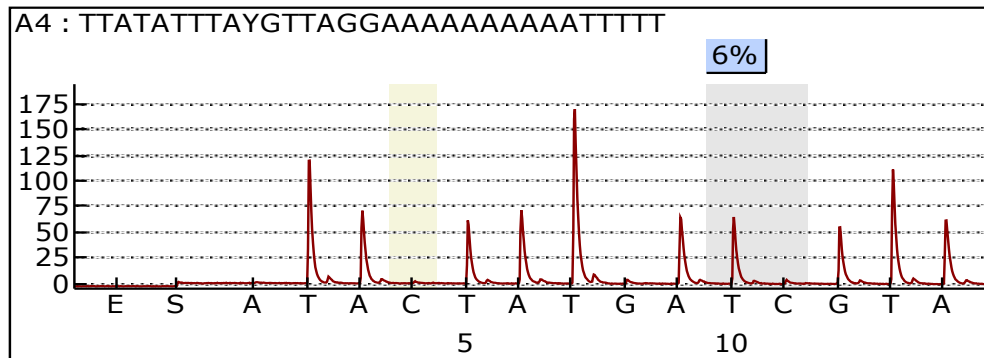

Assay Name: CZ-1  
Sample ID: 75  
Note:

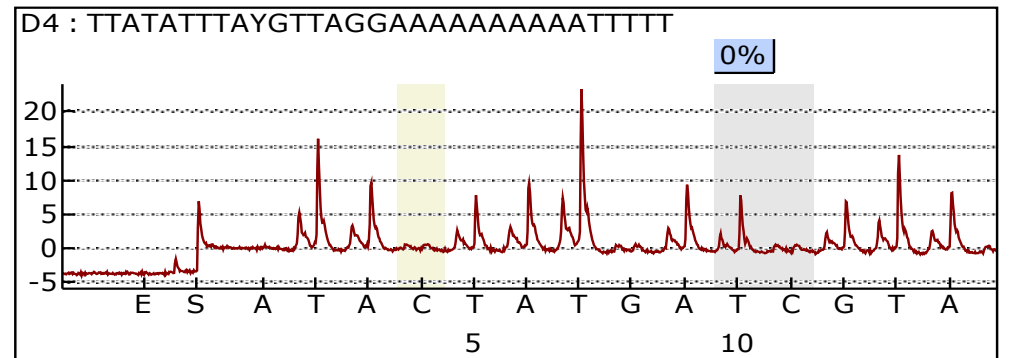



Assay Name: CZ-1  
Sample ID: 76  
Note:

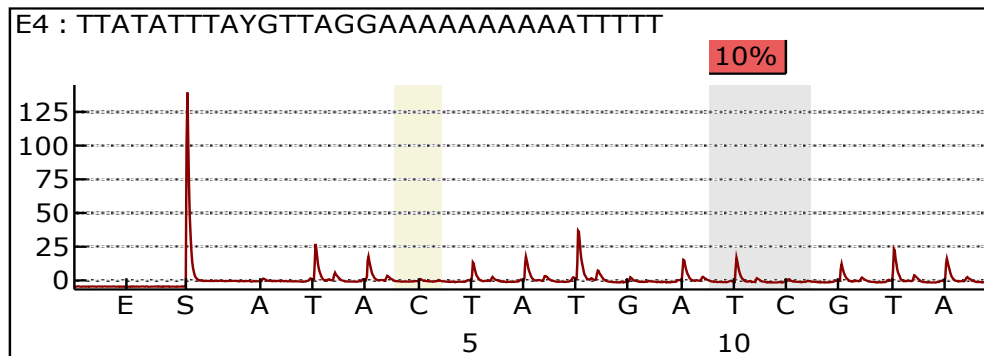

Assay Name: CZ-1  
Sample ID: 2  
Note:

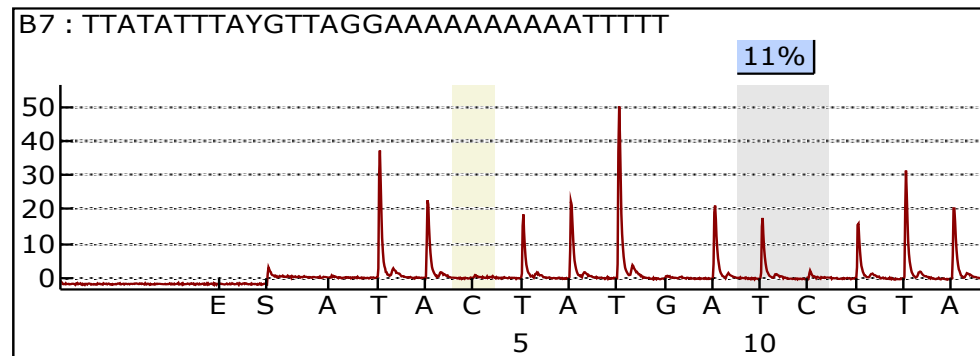

Assay Name: CZ-1  
Sample ID: 77  
Note:

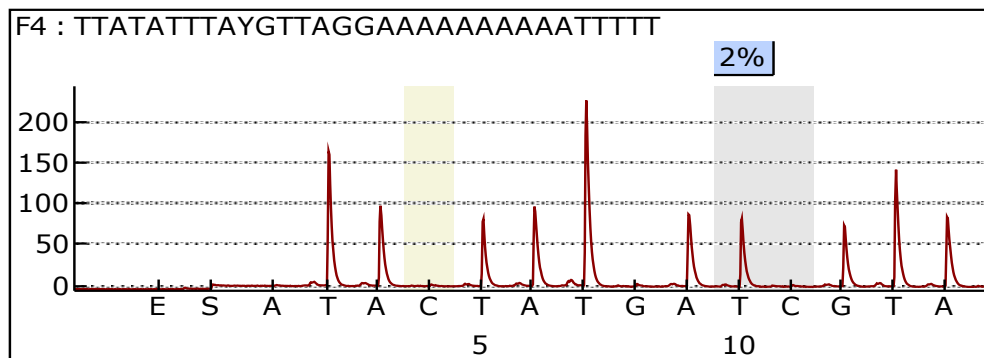

Assay Name: CZ-1  
Sample ID: 3  
Note:

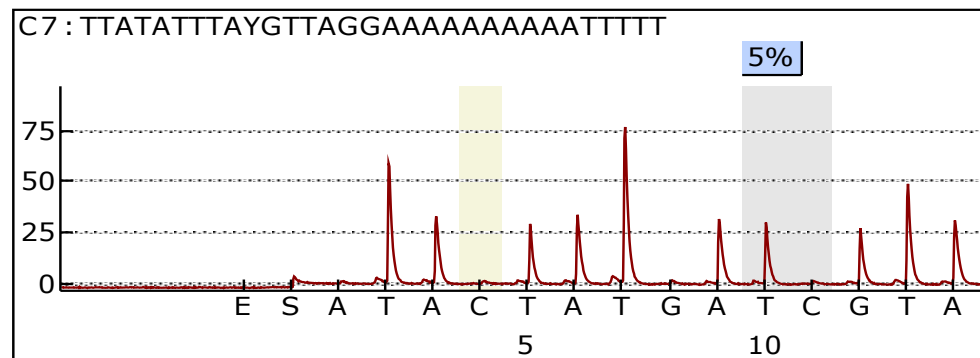

Assay Name: CZ-1  
Sample ID: 1  
Note:

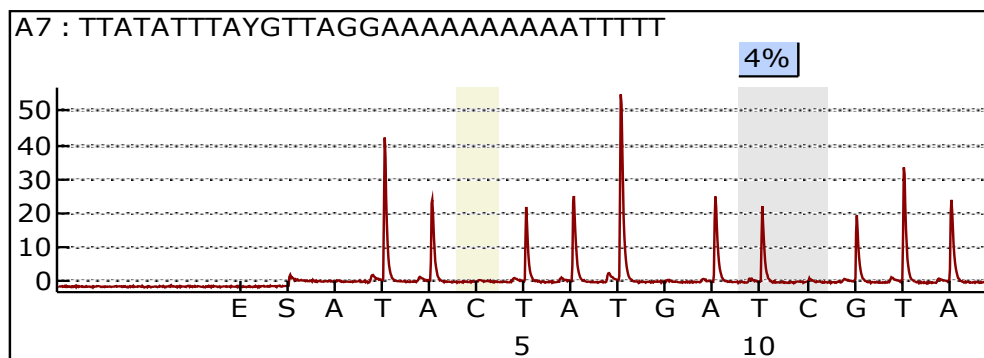

Assay Name: CZ-1  
Sample ID: 4  
Note:

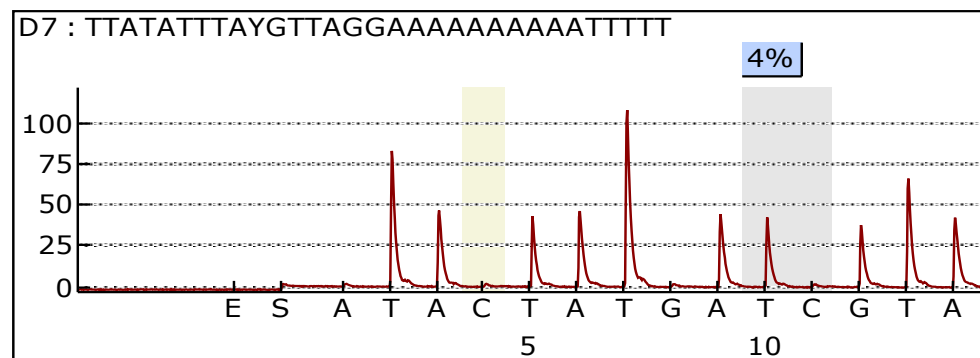

Assay Name: CZ-1  
Sample ID: 10  
Note:

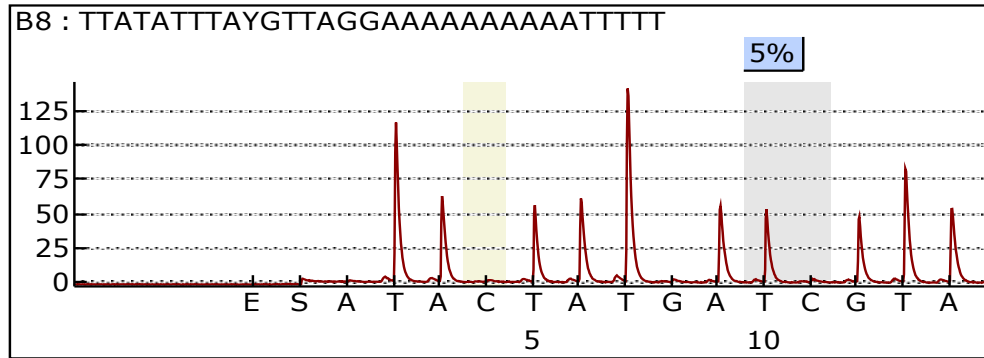

Assay Name: CZ-1  
Sample ID: 16  
Note:

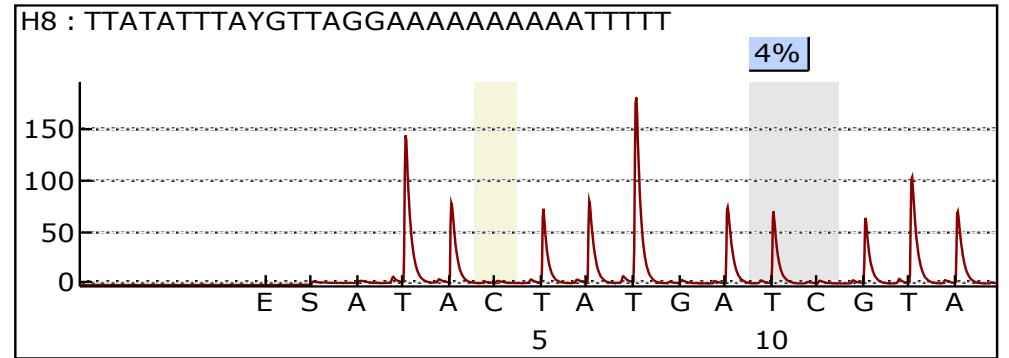

Assay Name: CZ-1  
Sample ID: 14  
Note:

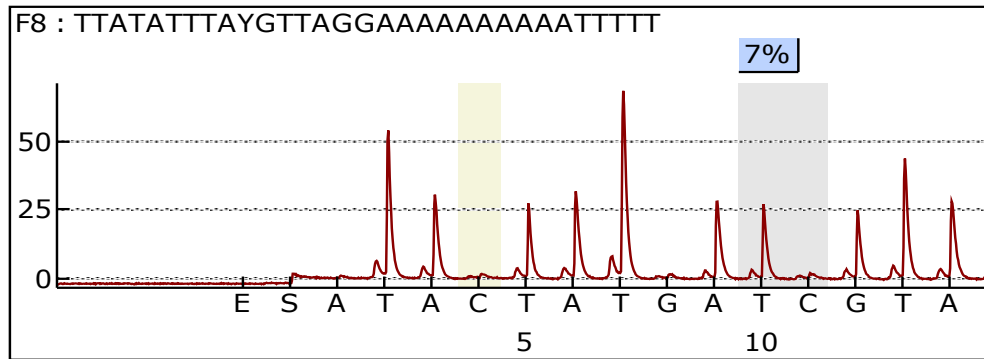

Assay Name: CZ-1  
Sample ID: 25  
Note:

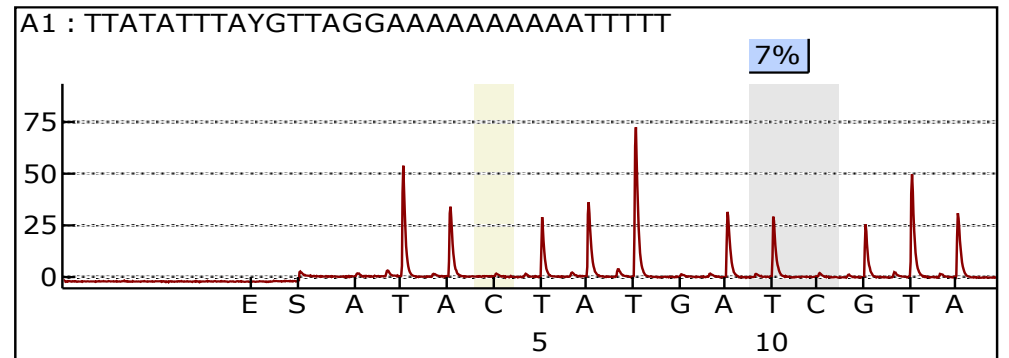

Assay Name: CZ-1  
Sample ID: 15  
Note:

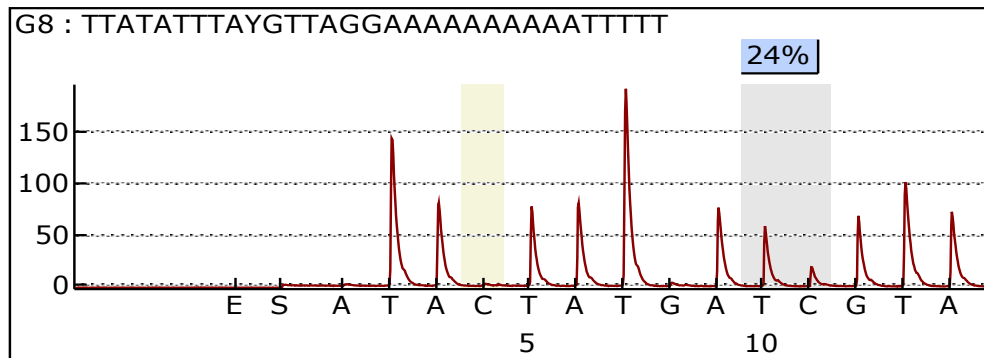

Assay Name: CZ-1  
Sample ID: 26  
Note:

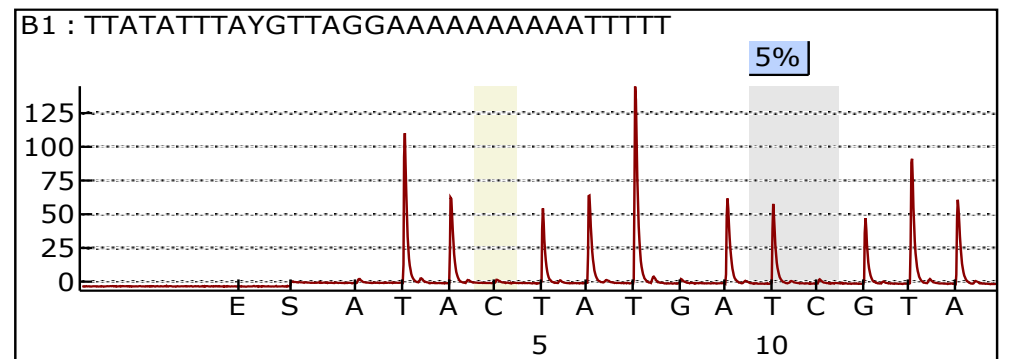

Assay Name: CZ-1  
Sample ID: 27  
Note:

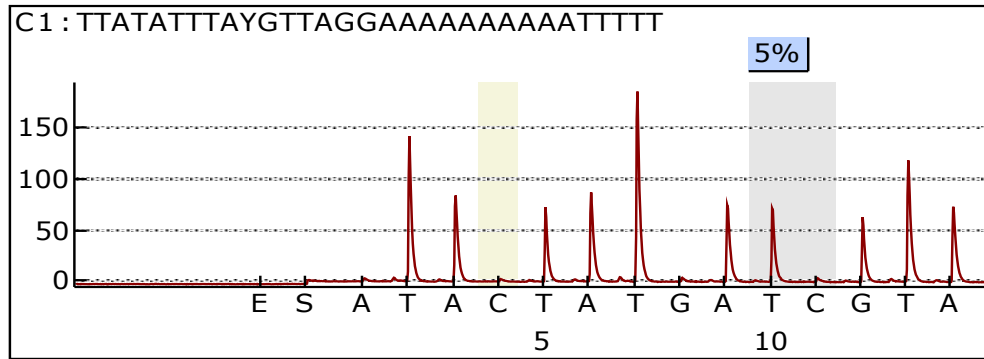

Assay Name: CZ-1  
Sample ID: 30  
Note:

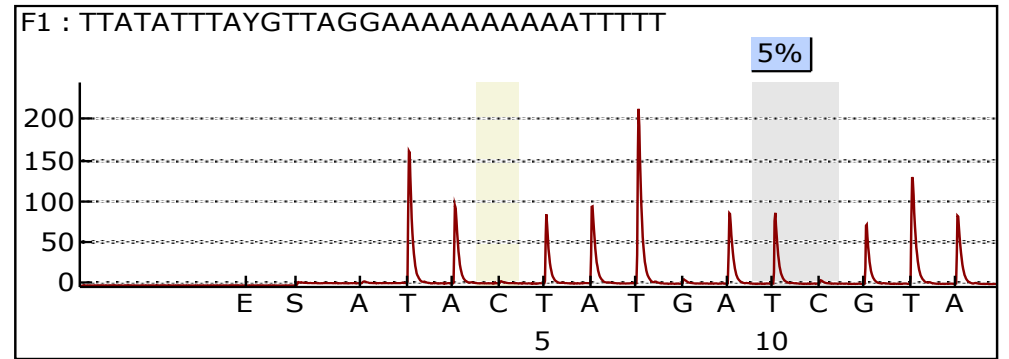

Assay Name: CZ-1  
Sample ID: 28  
Note:

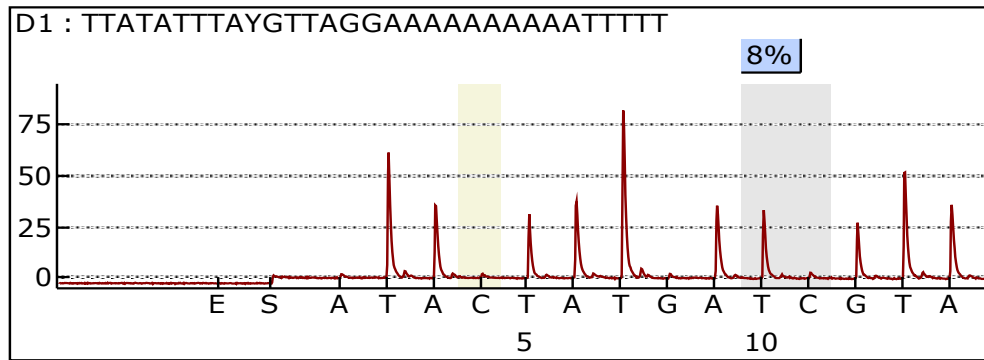

Assay Name: CZ-1  
Sample ID: 31  
Note:

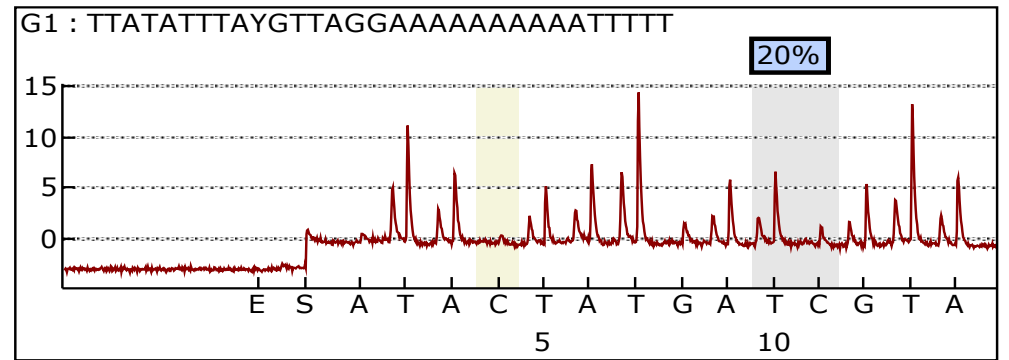

Assay Name: CZ-1  
Sample ID: 29  
Note:

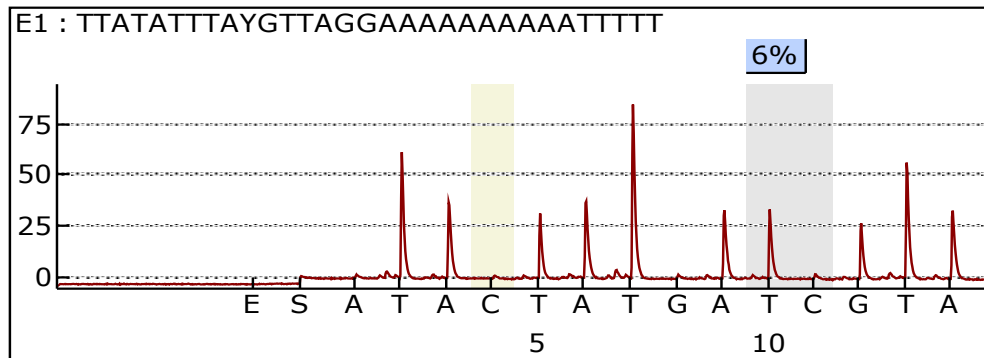

Assay Name: CZ-1  
Sample ID: 32  
Note:

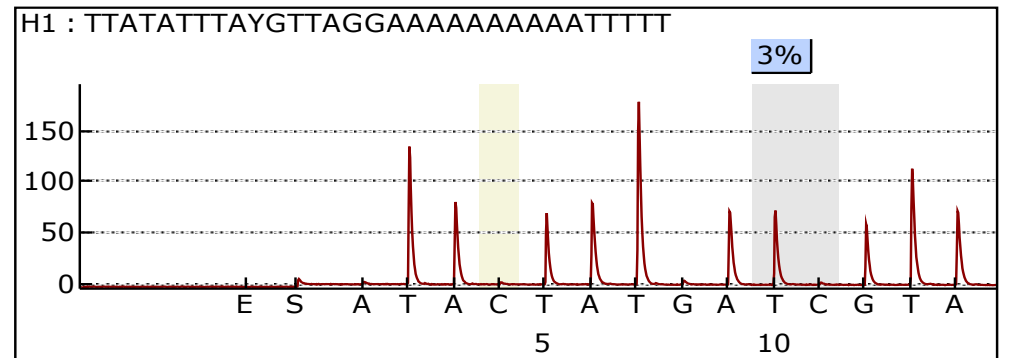

Assay Name: CZ-1  
Sample ID: 34  
Note:

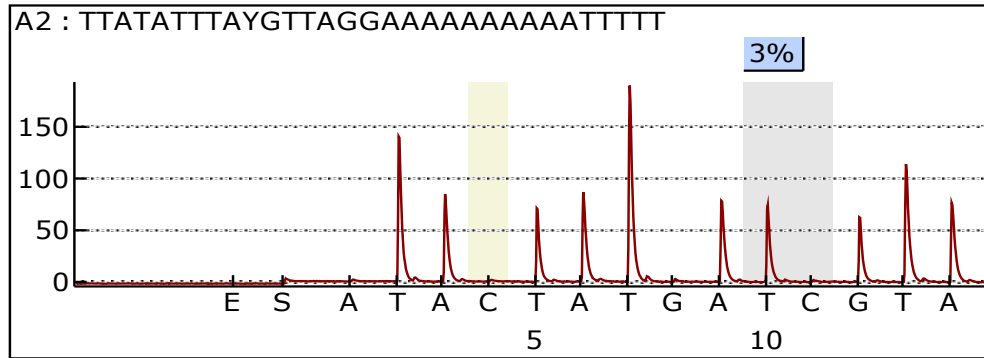

Assay Name: CZ-1  
Sample ID: 37  
Note:

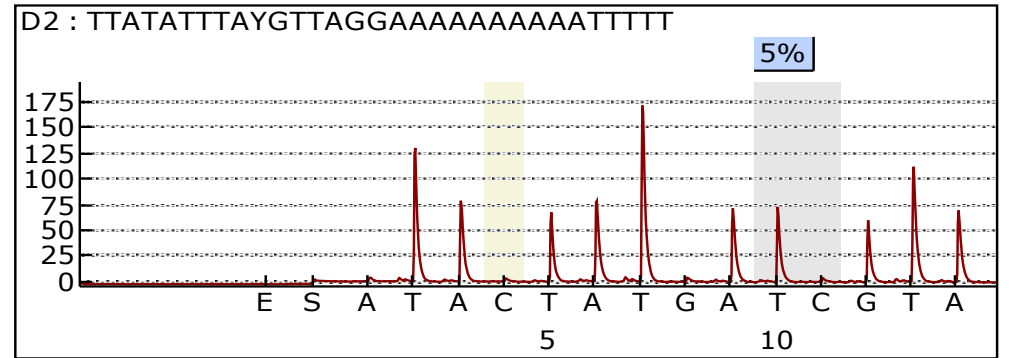

Assay Name: CZ-1  
Sample ID: 35  
Note:

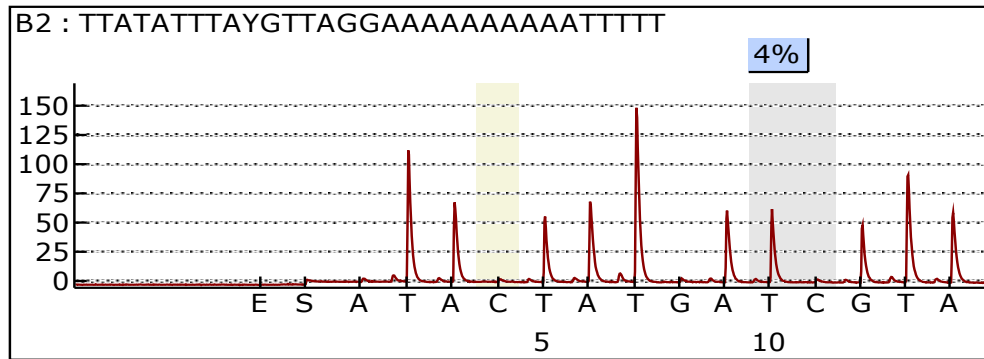

Assay Name: CZ-1  
Sample ID: 38  
Note:

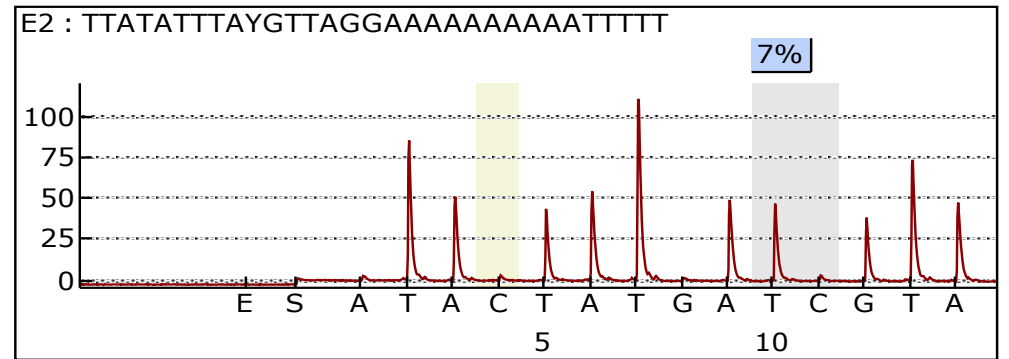

Assay Name: CZ-1  
Sample ID: 36  
Note:

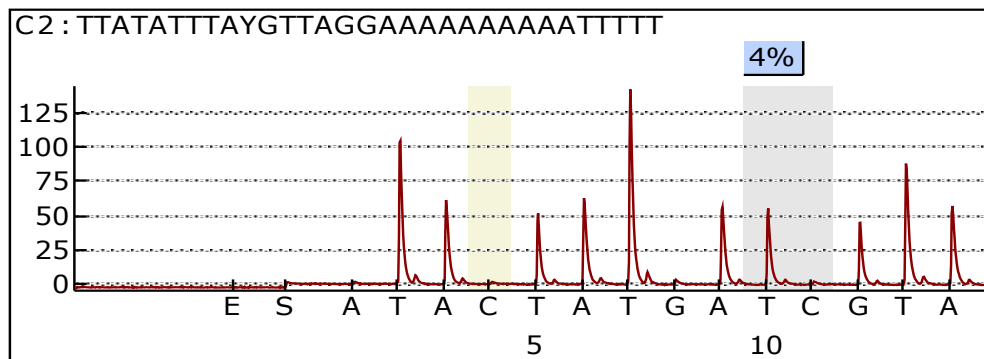

Assay Name: CZ-1  
Sample ID: 39  
Note:

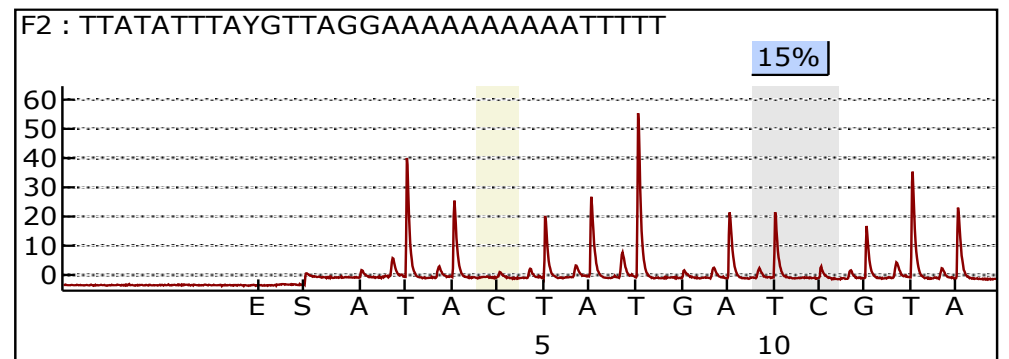

Assay Name: CZ-1  
Sample ID: 40  
Note:

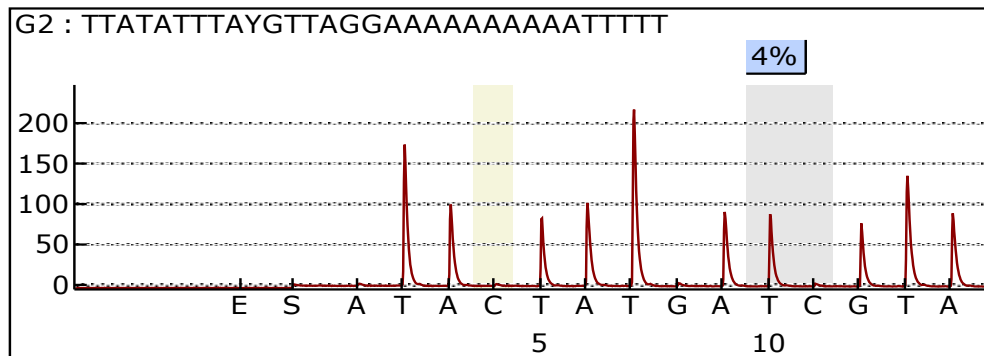

Assay Name: CZ-1  
Sample ID: 43  
Note:

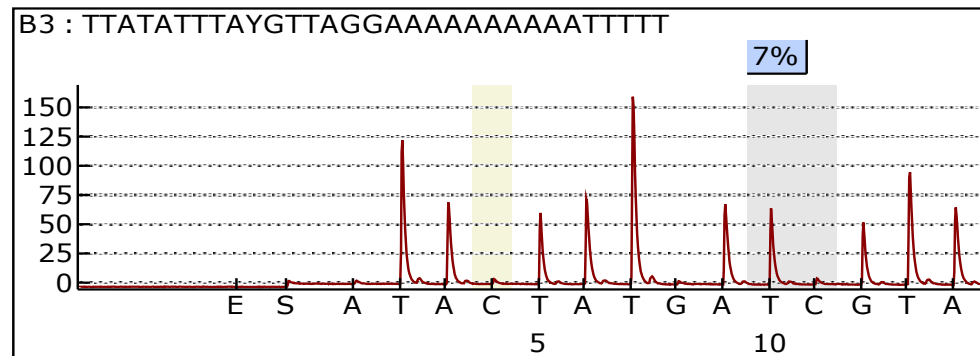

Assay Name: CZ-1  
Sample ID: 41  
Note:

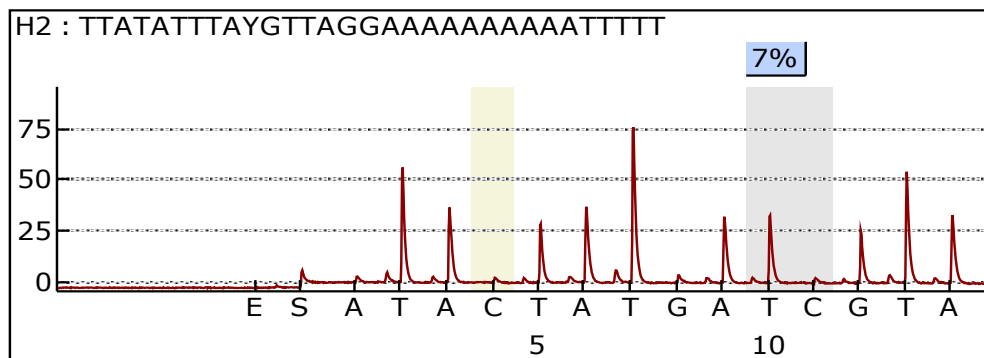

Assay Name: CZ-1  
Sample ID: 44  
Note:

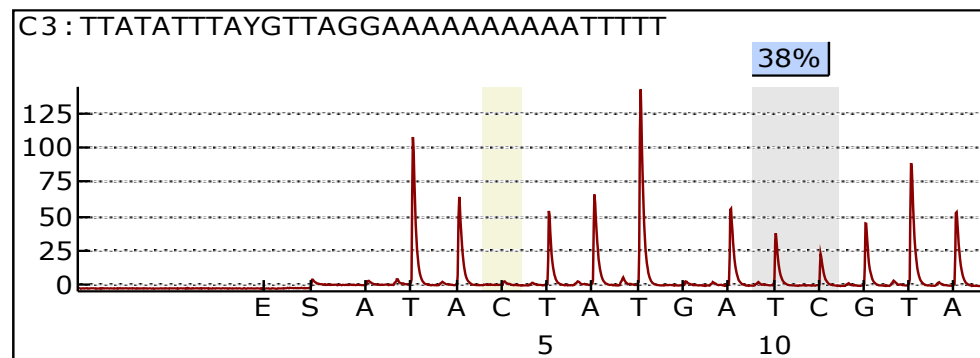

Assay Name: CZ-1  
Sample ID: 42  
Note:

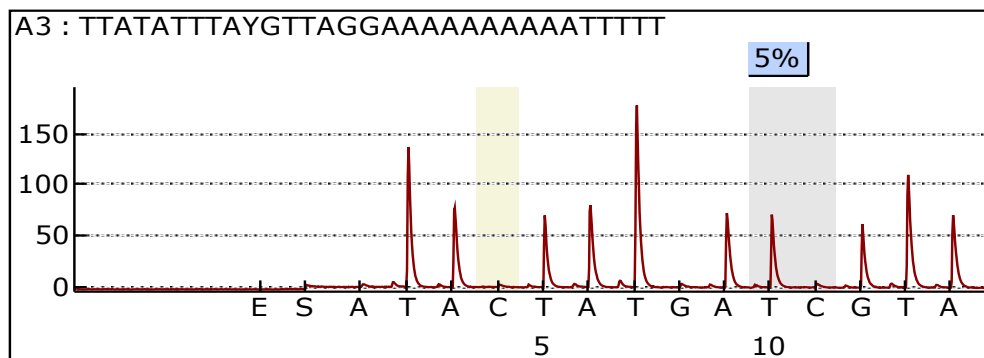

Assay Name: CZ-1  
Sample ID: 45  
Note:

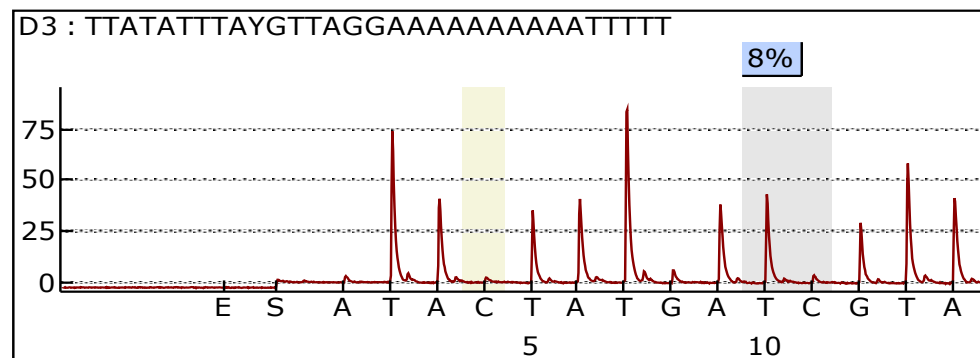

Assay Name: CZ-1  
Sample ID: 46  
Note:

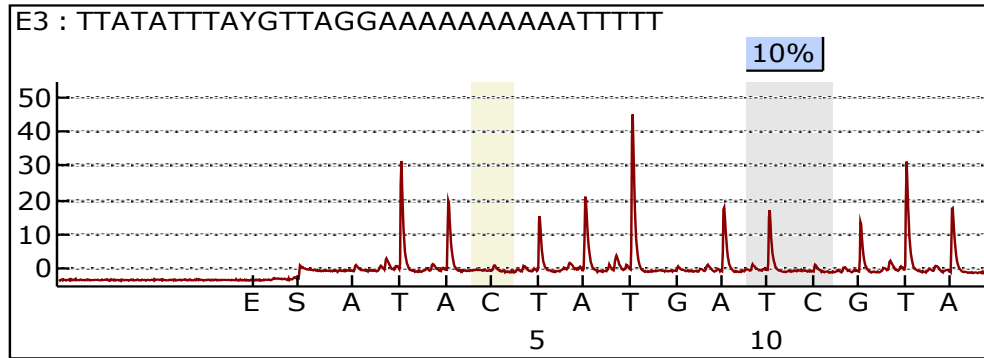

Assay Name: CZ-1  
Sample ID: 49  
Note:

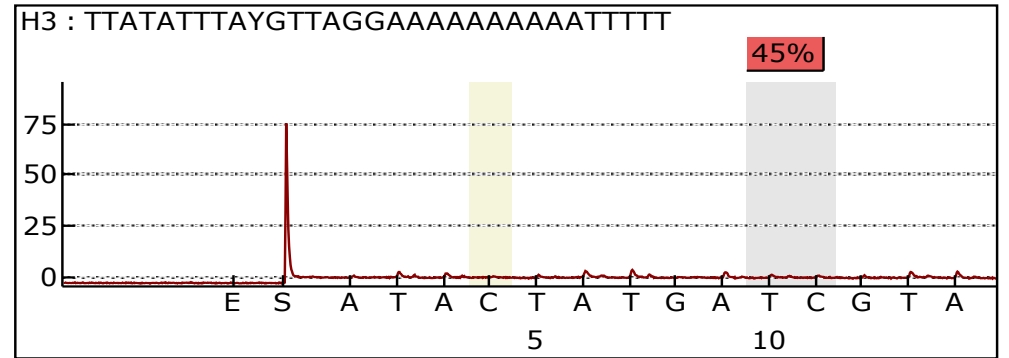

Assay Name: CZ-1  
Sample ID: 47  
Note:

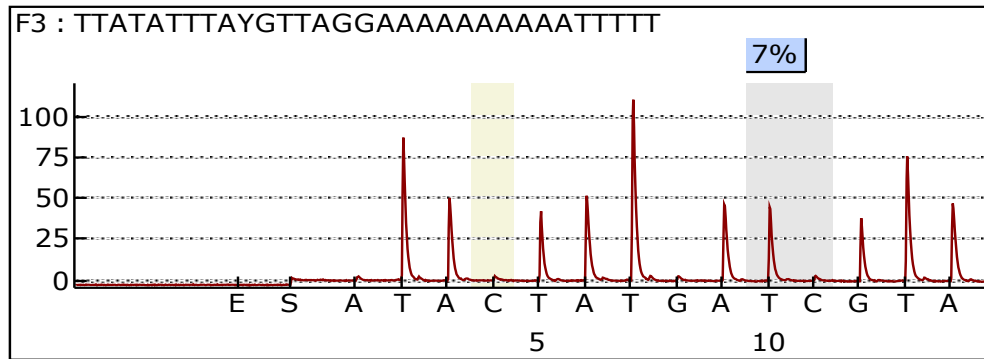

Assay Name: CZ-1  
Sample ID: 50  
Note:

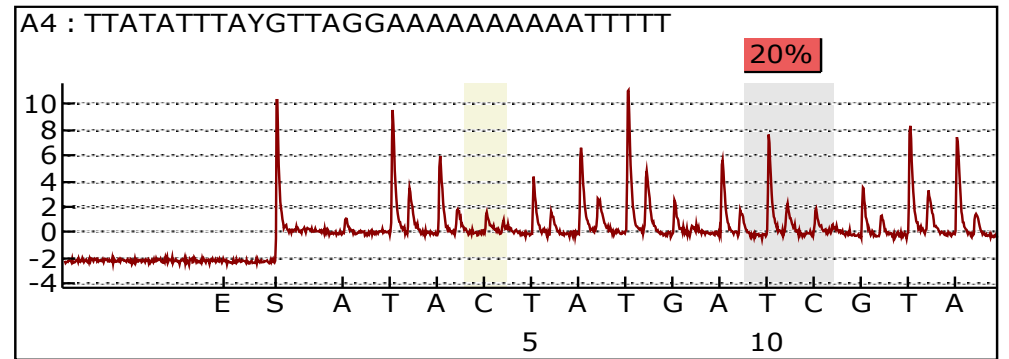

Assay Name: CZ-1  
Sample ID: 48  
Note:

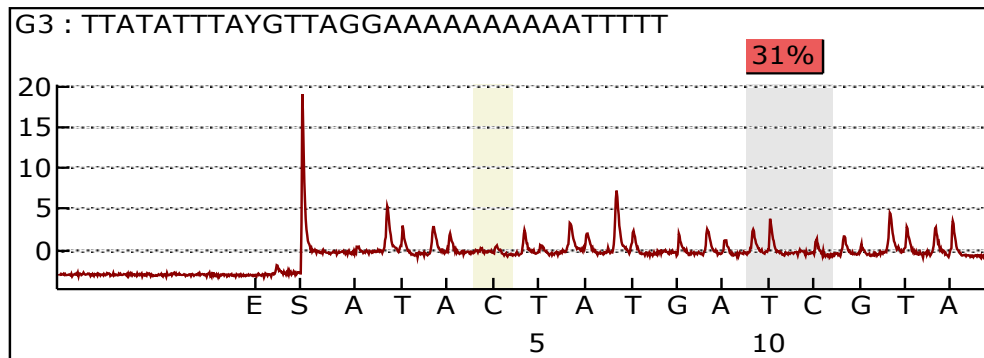

Assay Name: CZ-1  
Sample ID: 51  
Note:

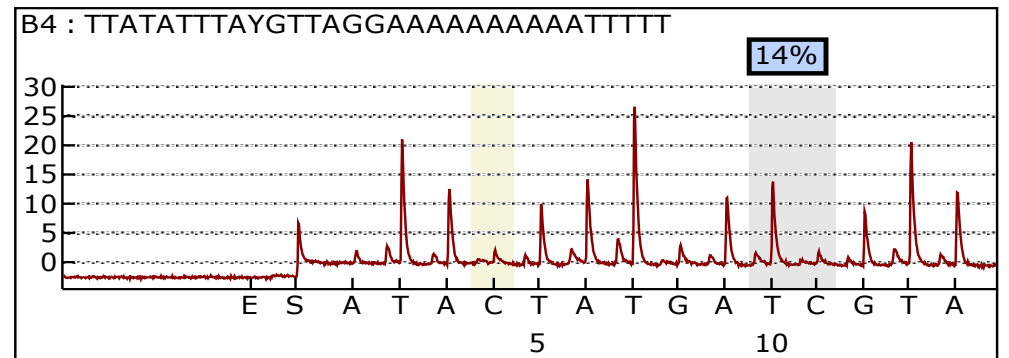

Assay Name: CZ-1  
Sample ID: 52  
Note:

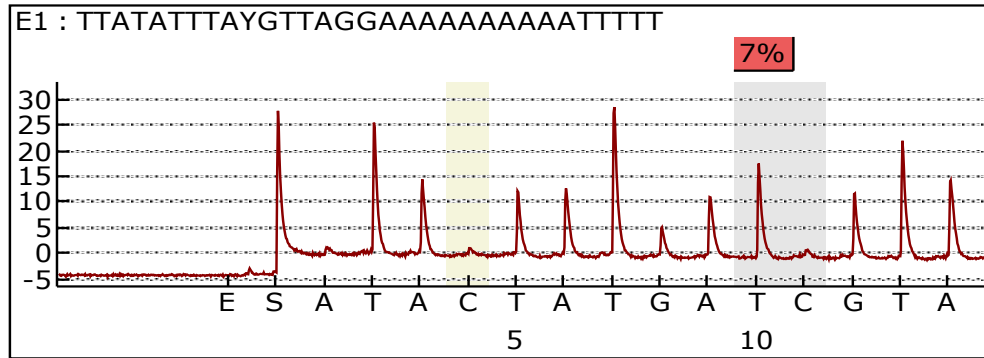

Assay Name: CZ-1  
Sample ID: 55  
Note:

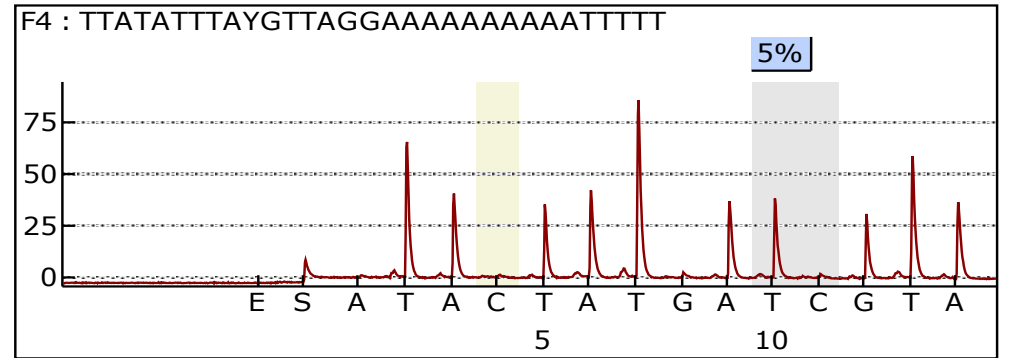

Assay Name: CZ-1  
Sample ID: 53  
Note:

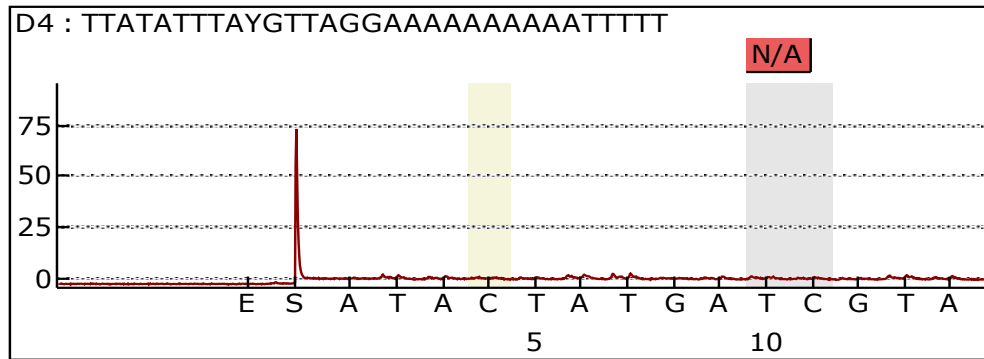

Assay Name: CZ-1  
Sample ID: 54  
Note:

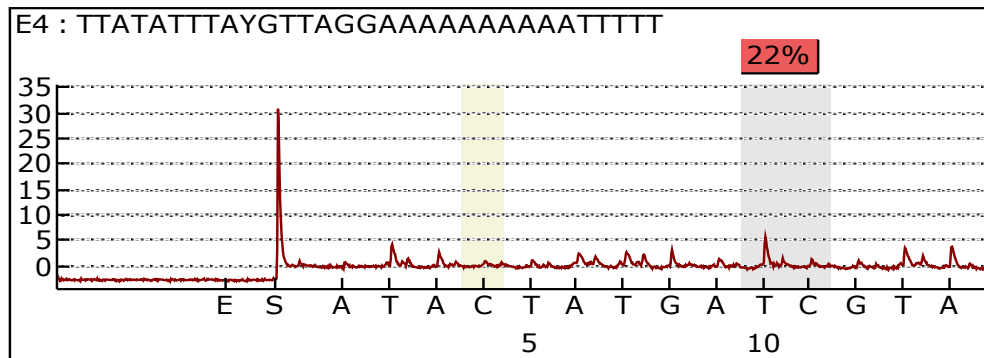

Assay Name: CZ-1  
Sample ID: 103  
Note:

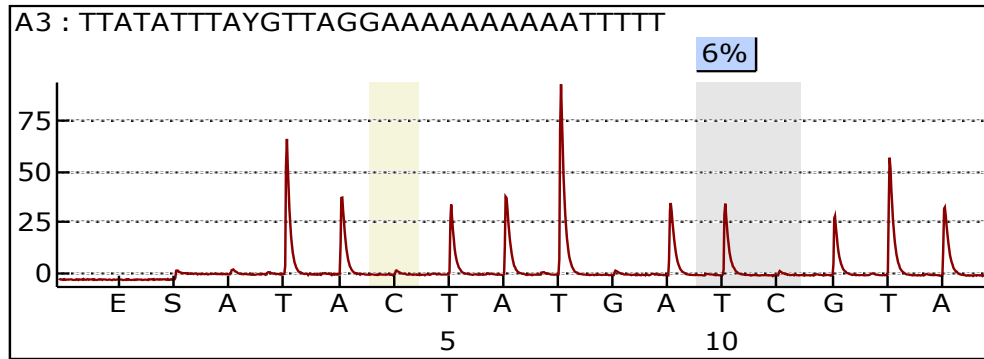

Assay Name: CZ-1  
Sample ID: 113  
Note:

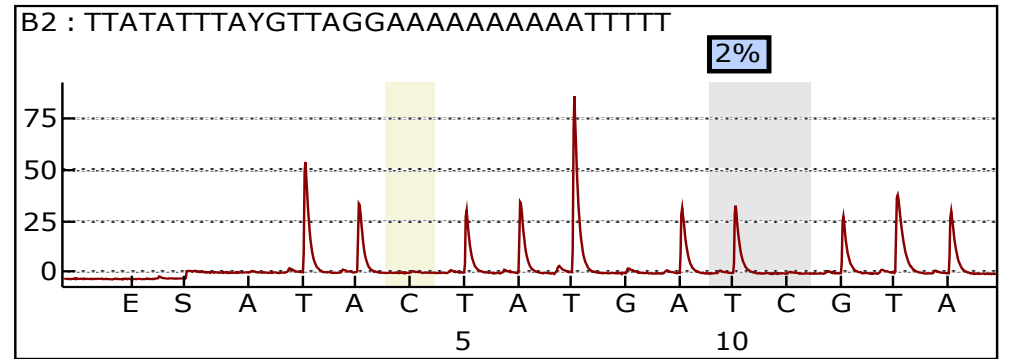

Assay Name: CZ-1  
Sample ID: 111  
Note:

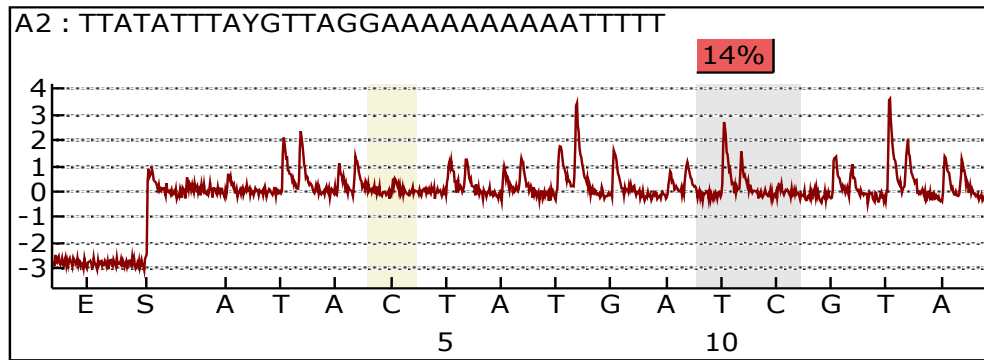

Assay Name: CZ-1  
Sample ID: 114  
Note:

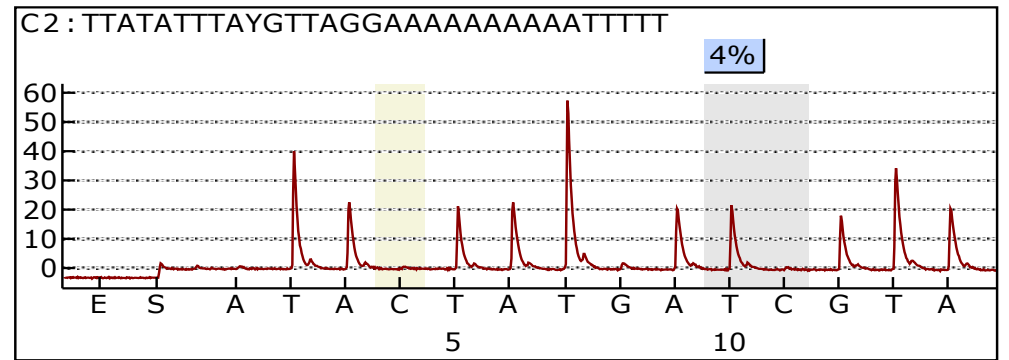

Assay Name: CZ-1  
Sample ID: 112  
Note:

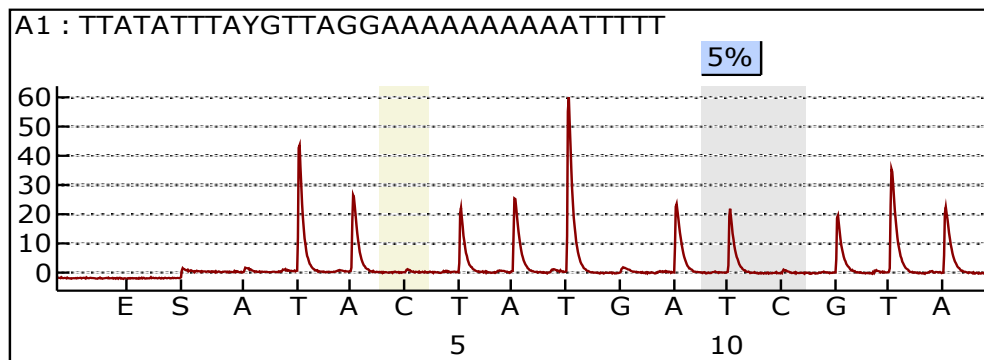

Assay Name: CZ-1  
Sample ID: 136  
Note:

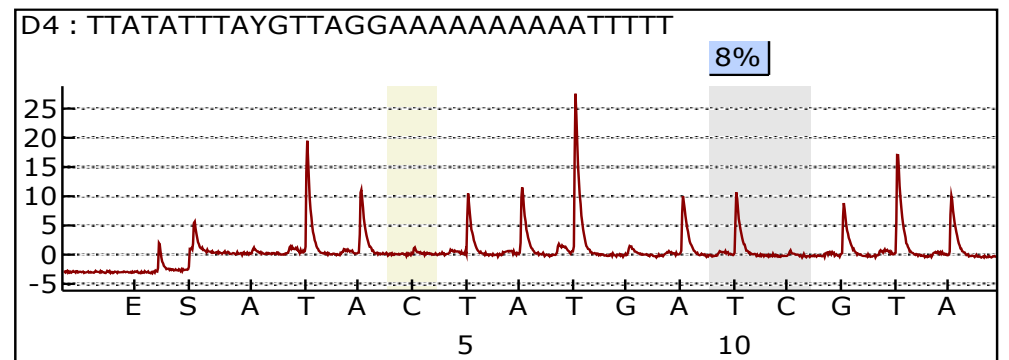



Assay Name: CZ-1  
Sample ID: 150  
Note:

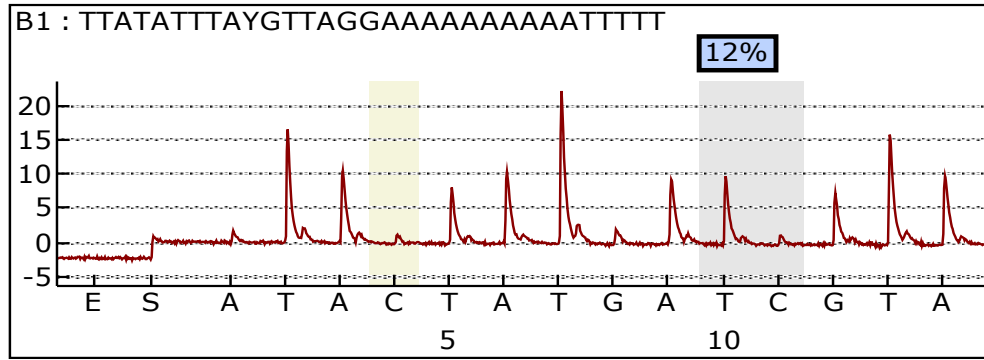

Assay Name: CZ-1  
Sample ID: 154  
Note:

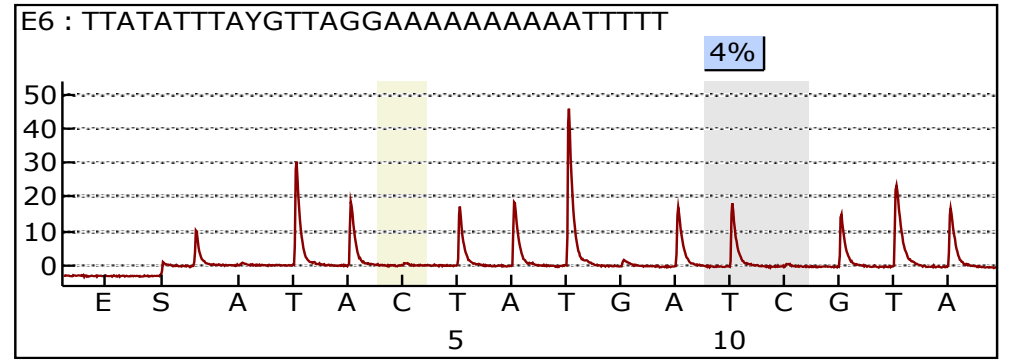

Assay Name: CZ-1  
Sample ID: 151  
Note:

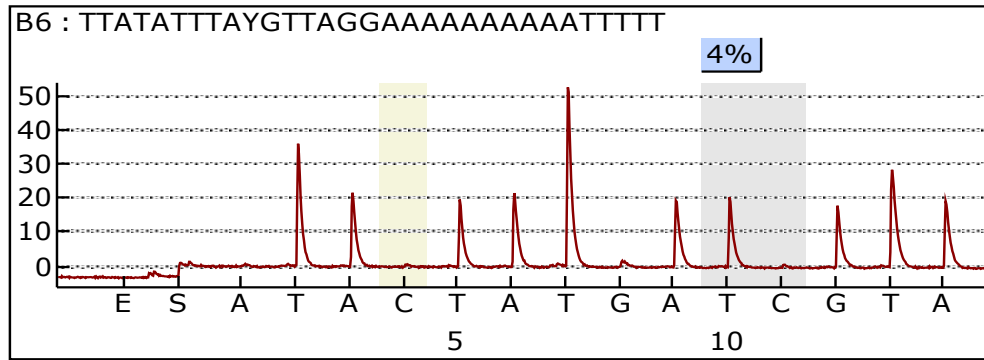

Assay Name: CZ-1  
Sample ID: 161  
Note:

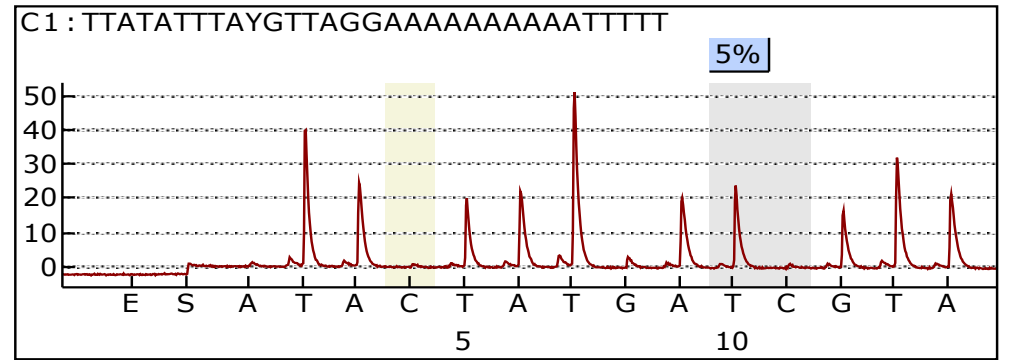

Assay Name: CZ-1  
Sample ID: 152  
Note:

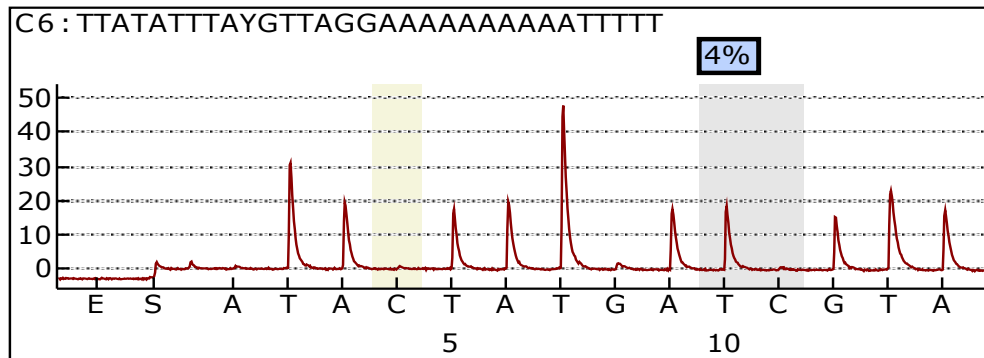

Assay Name: CZ-1  
Sample ID: 165  
Note:

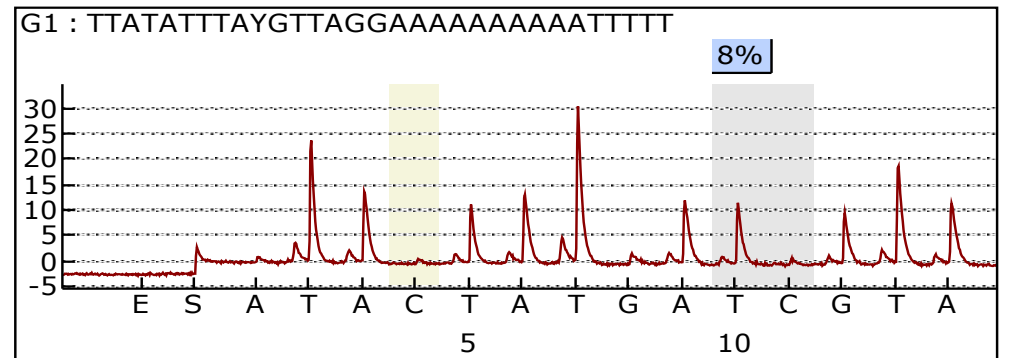

Assay Name: CZ-1  
Sample ID: 166  
Note:

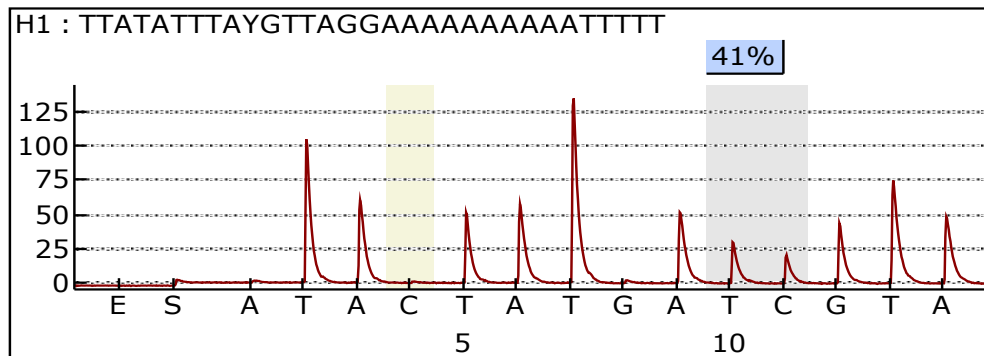

Assay Name: CZ-1  
Sample ID: 182  
Note:

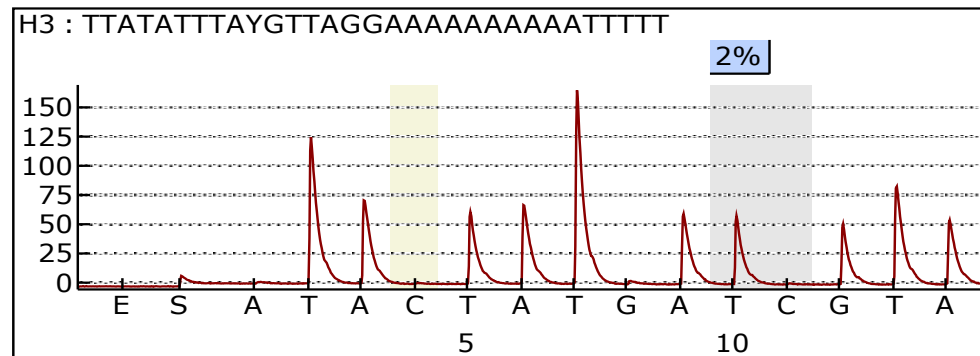

Assay Name: CZ-1  
Sample ID: 167  
Note:

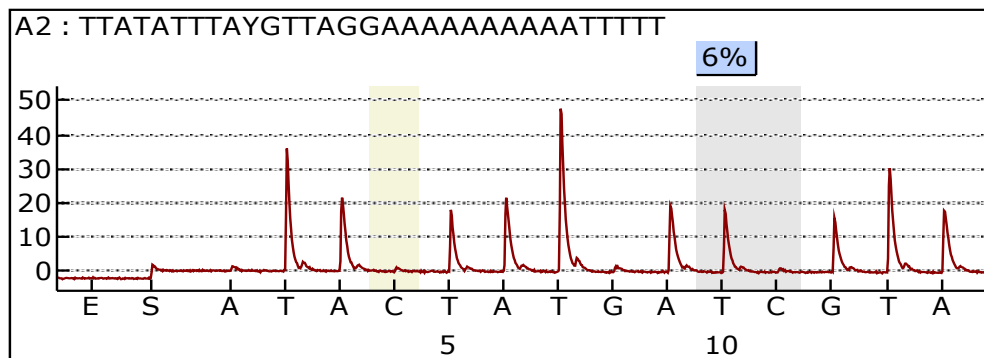

Assay Name: CZ-1  
Sample ID: 183  
Note:

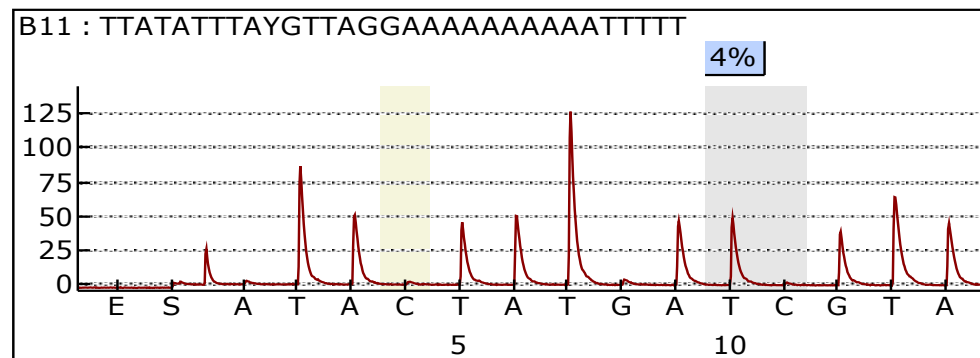

Assay Name: CZ-1  
Sample ID: 178  
Note:

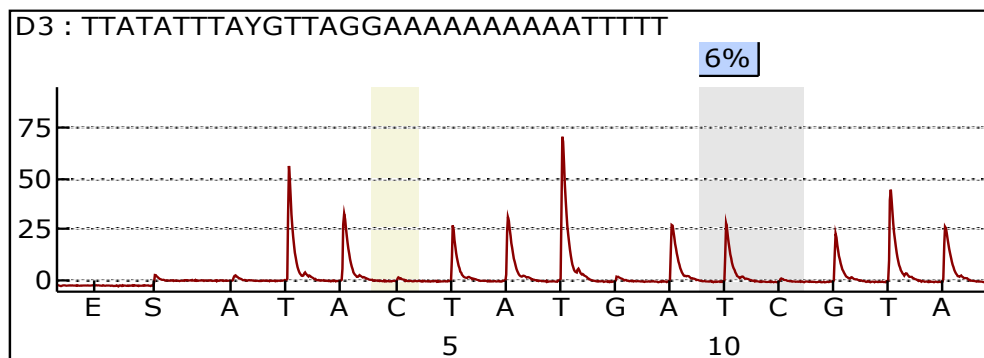

Assay Name: CZ-1  
Sample ID: 185  
Note:

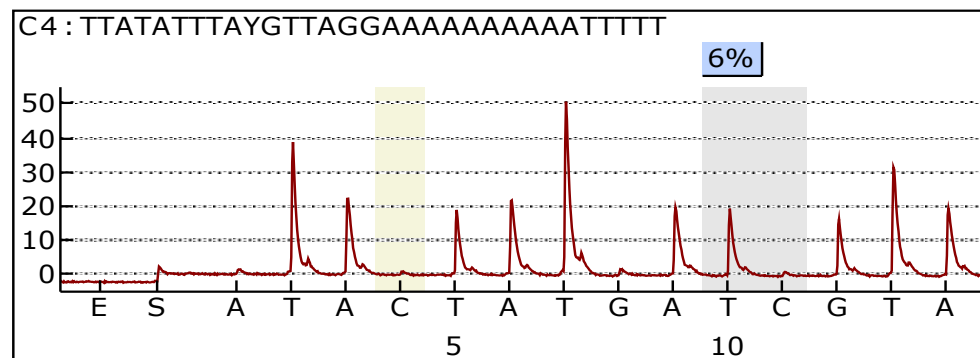

Assay Name: CZ-1  
Sample ID: 189  
Note:

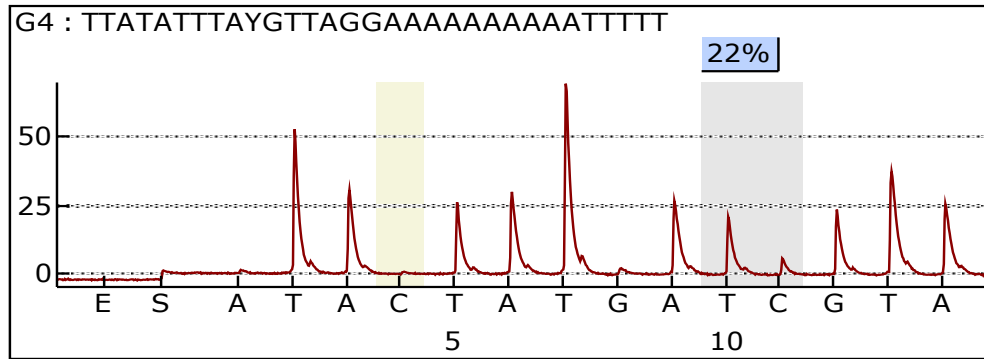

Assay Name: CZ-1  
Sample ID: 195  
Note:

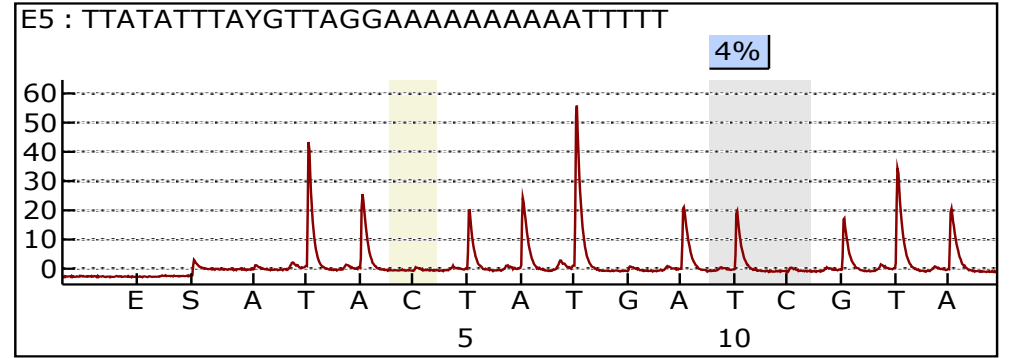

Assay Name: CZ-1  
Sample ID: 191  
Note:

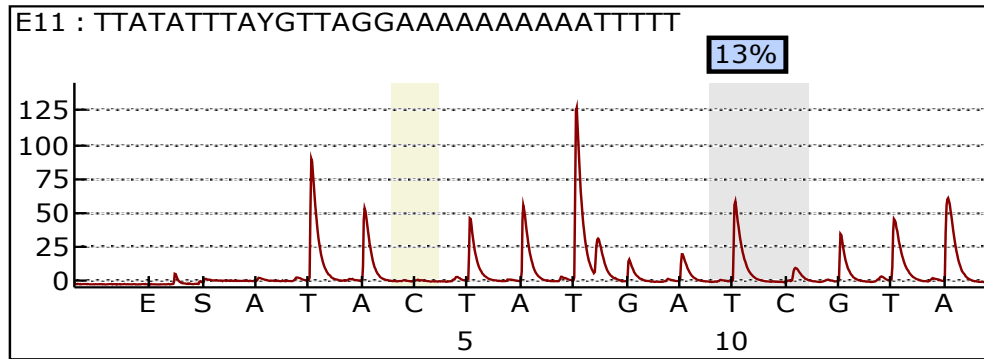

Assay Name: CZ-1  
Sample ID: 204  
Note:

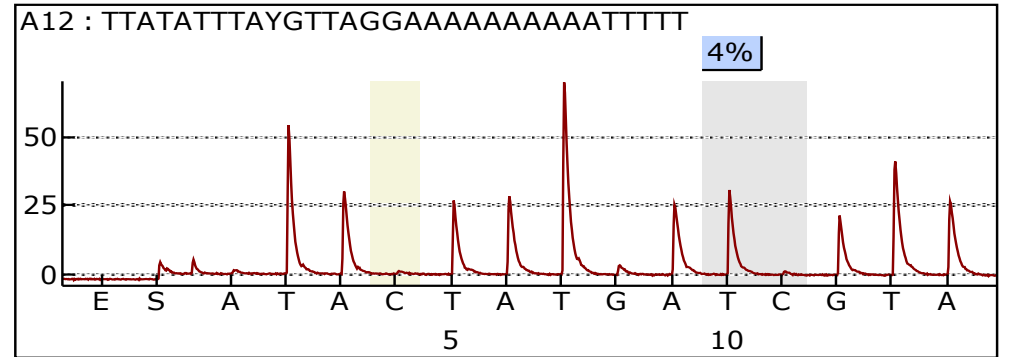

Assay Name: CZ-1  
Sample ID: 194  
Note:

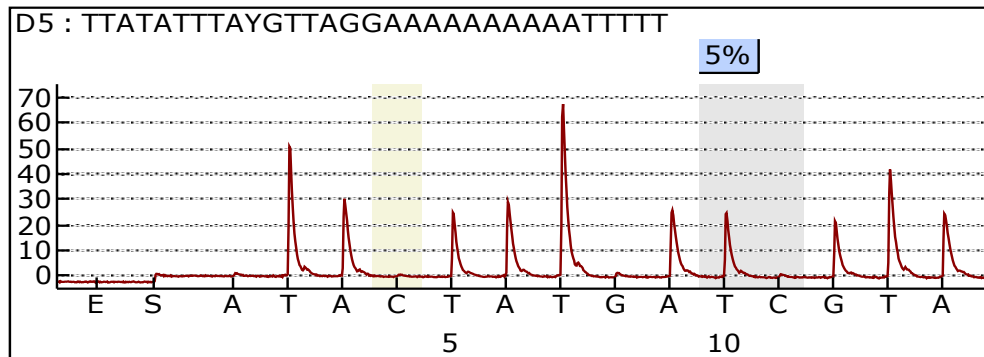

Assay Name: CZ-1  
Sample ID: 208  
Note:

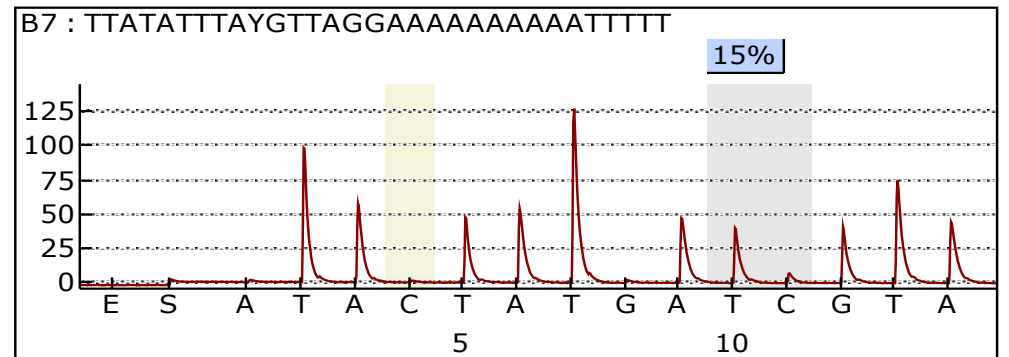

Assay Name: CZ-1  
Sample ID: 101  
Note:

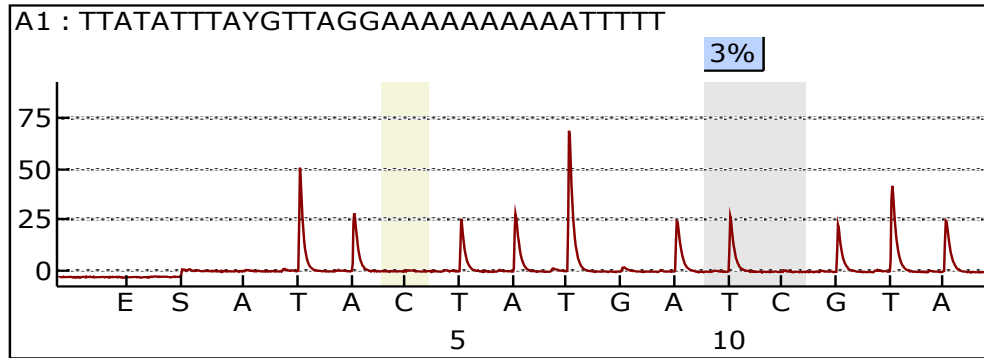

Assay Name: CZ-1  
Sample ID: 118  
Note:

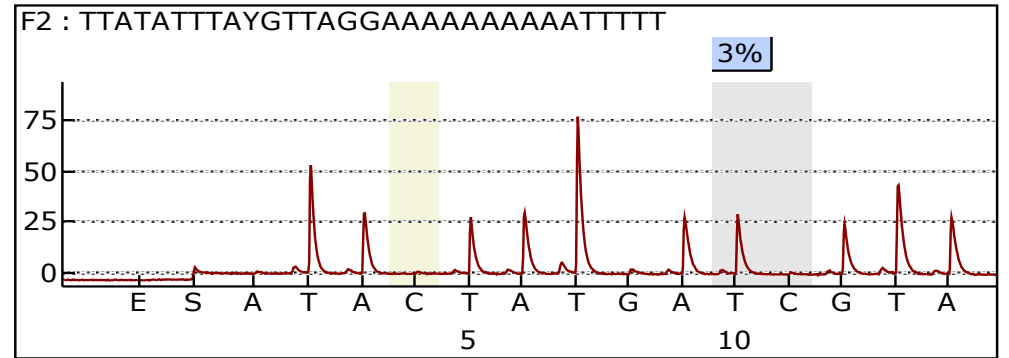

Assay Name: CZ-1  
Sample ID: 102  
Note:

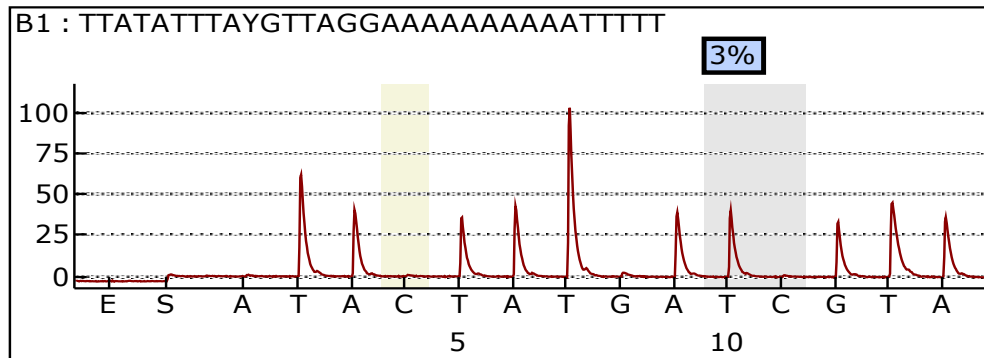

Assay Name: CZ-1  
Sample ID: 120  
Note:

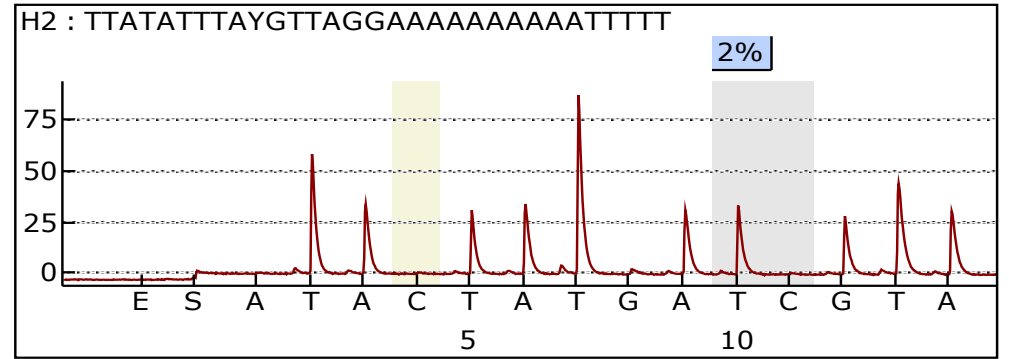

Assay Name: CZ-1  
Sample ID: 116  
Note:

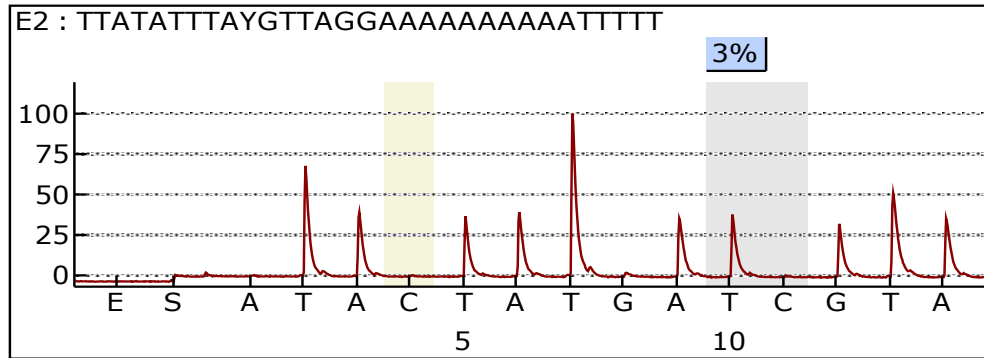

Assay Name: CZ-1  
Sample ID: 127  
Note:

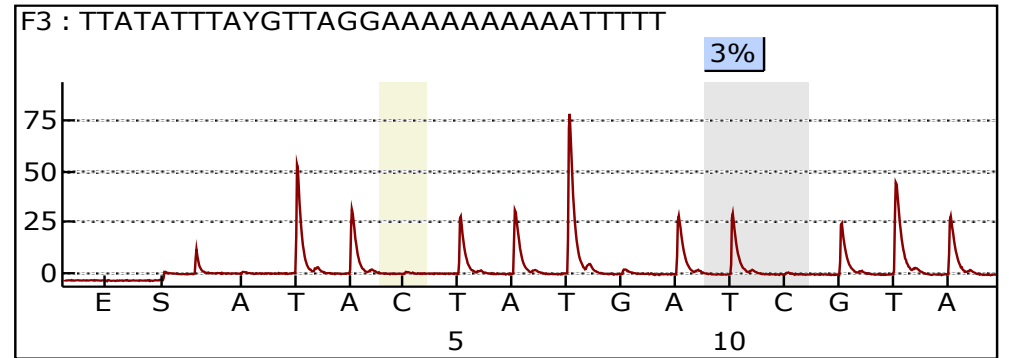

Assay Name: CZ-1  
Sample ID: 128  
Note:

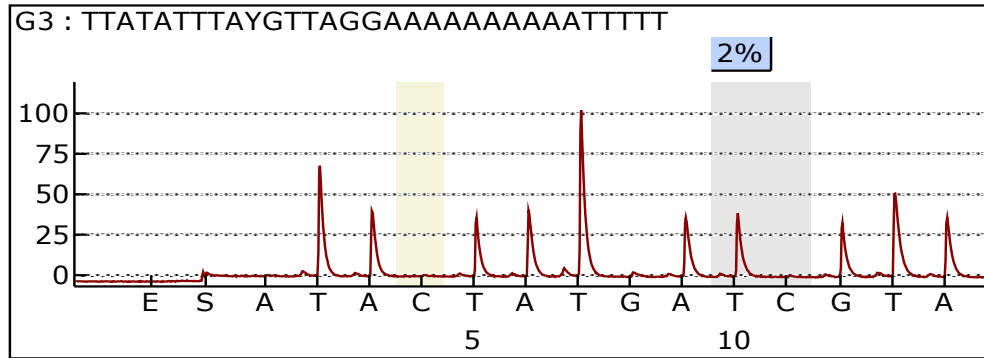

Assay Name: CZ-1  
Sample ID: 135  
Note:

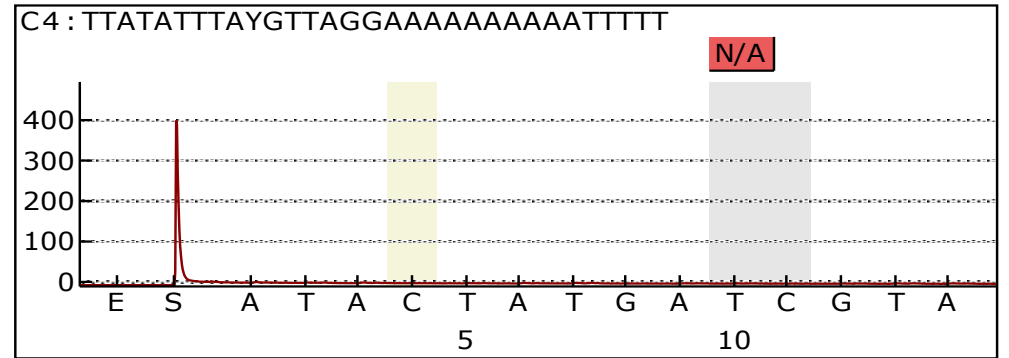

Assay Name: CZ-1  
Sample ID: 129  
Note:

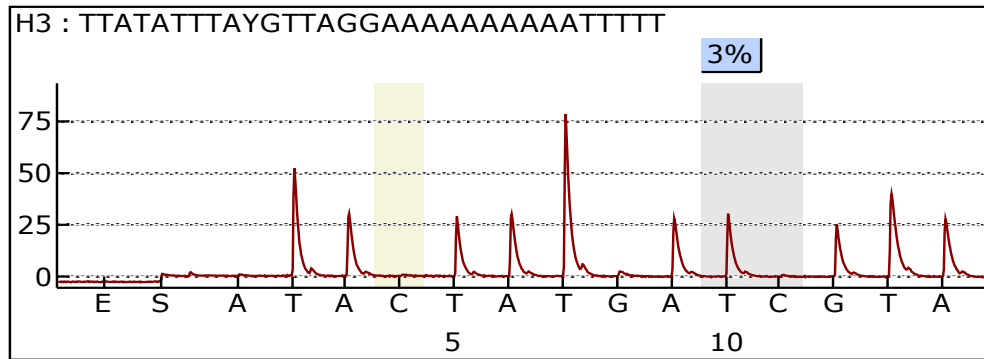

Assay Name: CZ-1  
Sample ID: 139  
Note:

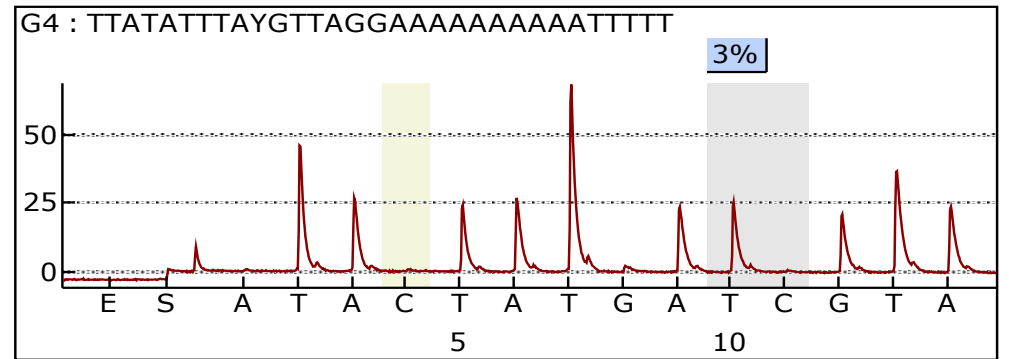

Assay Name: CZ-1  
Sample ID: 130  
Note:

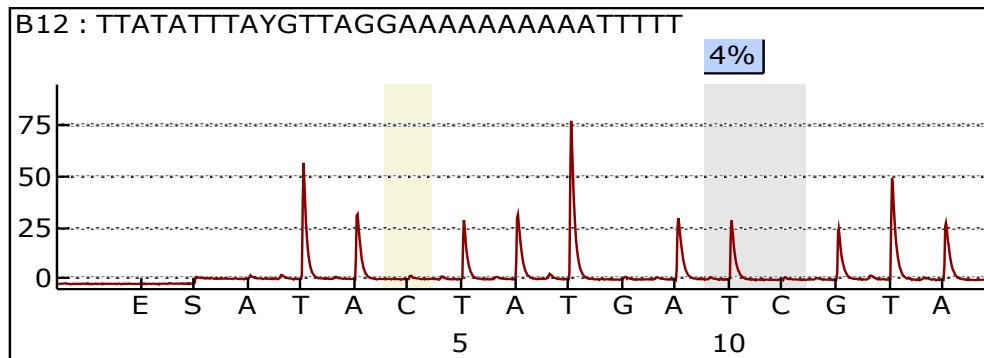

Assay Name: CZ-1  
Sample ID: 147  
Note:

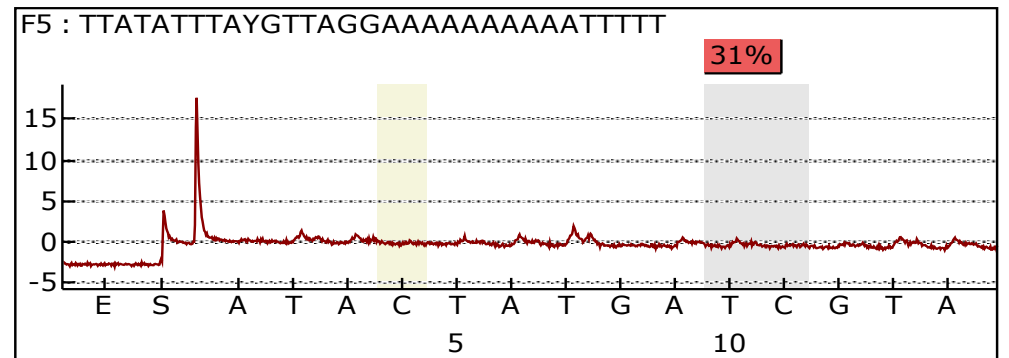

Assay Name: CZ-1  
Sample ID: 148  
Note:

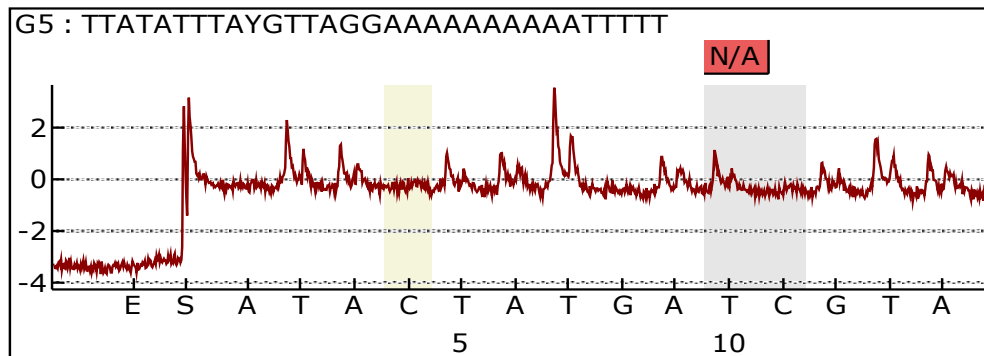

Assay Name: CZ-1  
Sample ID: 158  
Note:

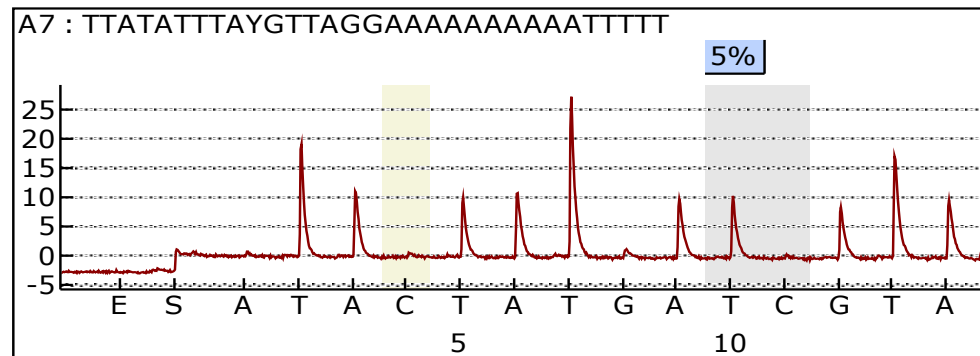

Assay Name: CZ-1  
Sample ID: 155  
Note:

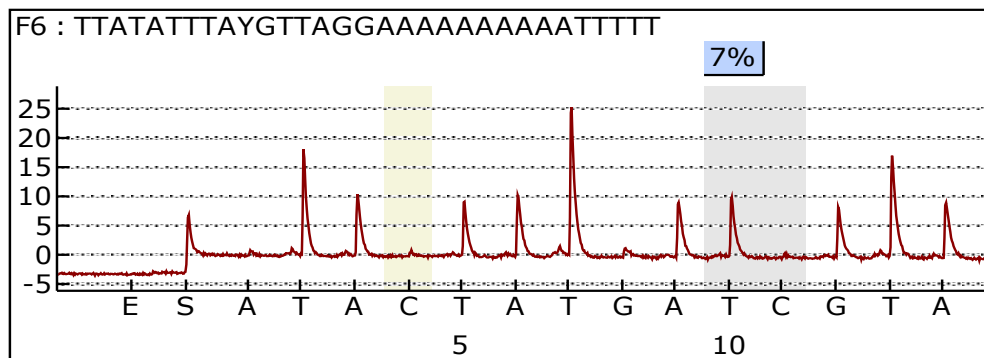

Assay Name: CZ-1  
Sample ID: 159  
Note:

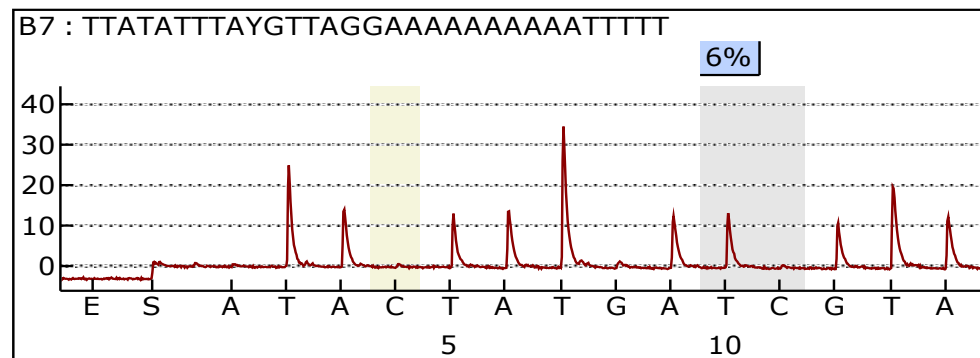

Assay Name: CZ-1  
Sample ID: 156  
Note:

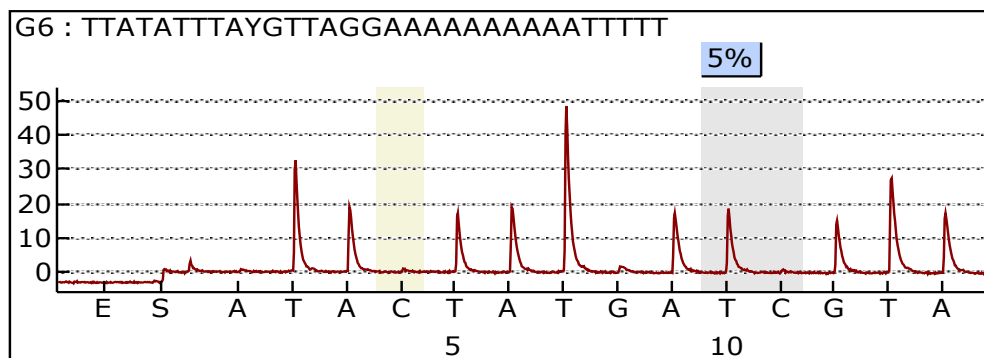

Assay Name: CZ-1  
Sample ID: 160  
Note:

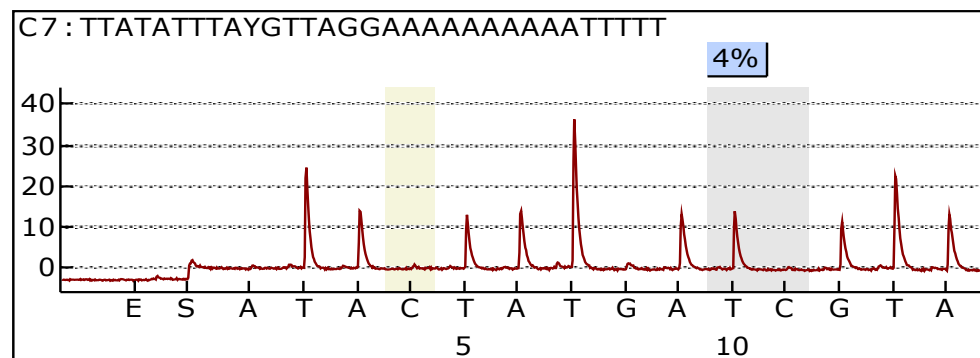

Assay Name: CZ-1  
Sample ID: 162  
Note:

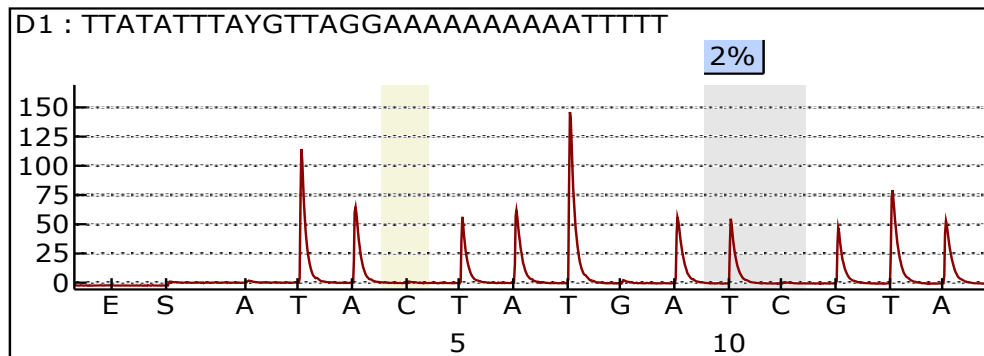

Assay Name: CZ-1  
Sample ID: 169  
Note:

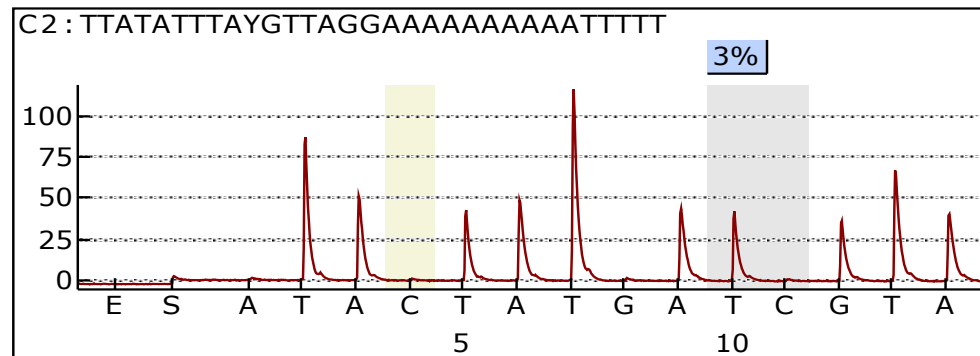

Assay Name: CZ-1  
Sample ID: 164  
Note:

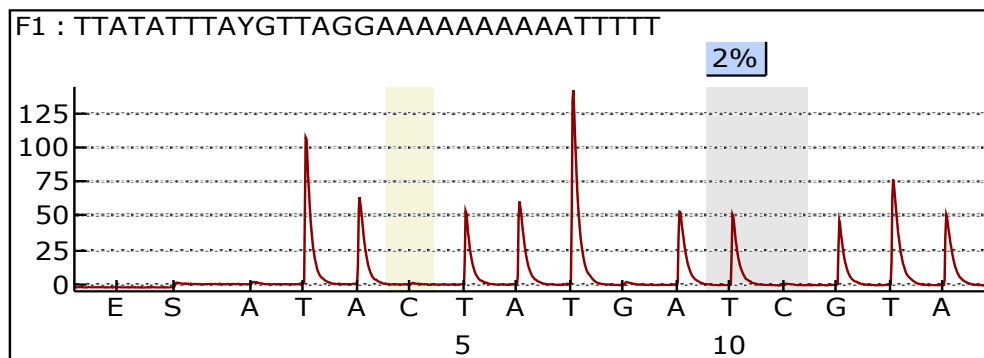

Assay Name: CZ-1  
Sample ID: 172  
Note:

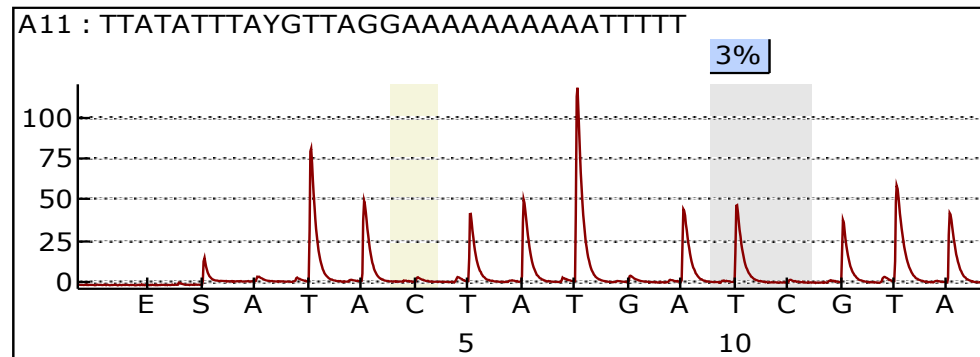

Assay Name: CZ-1  
Sample ID: 168  
Note:

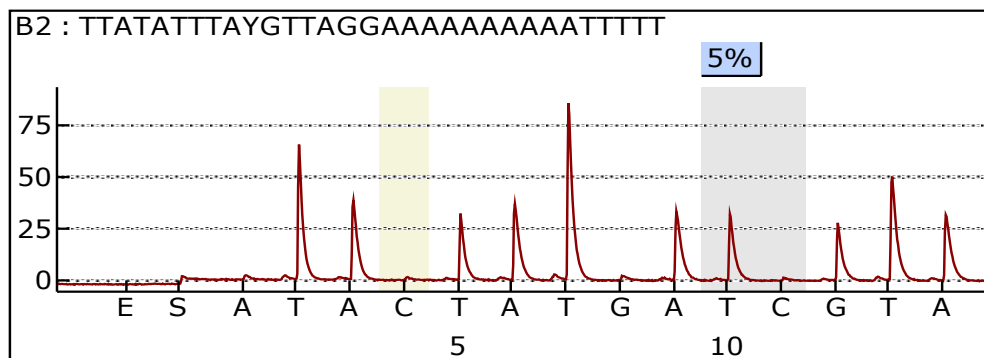

Assay Name: CZ-1  
Sample ID: 173  
Note:

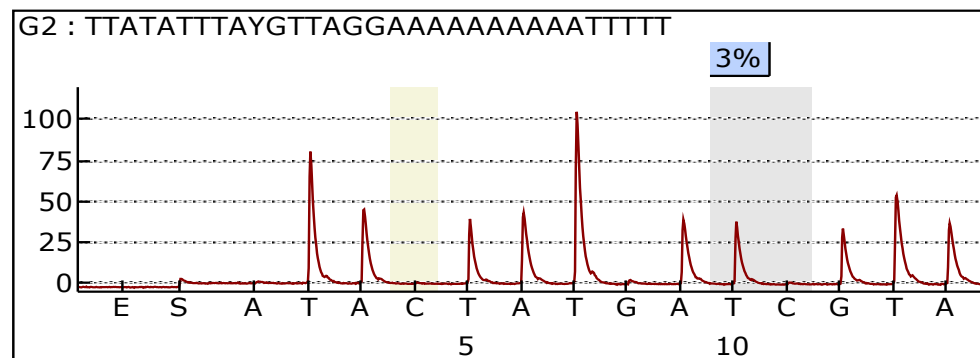

Assay Name: CZ-1  
Sample ID: 177  
Note:

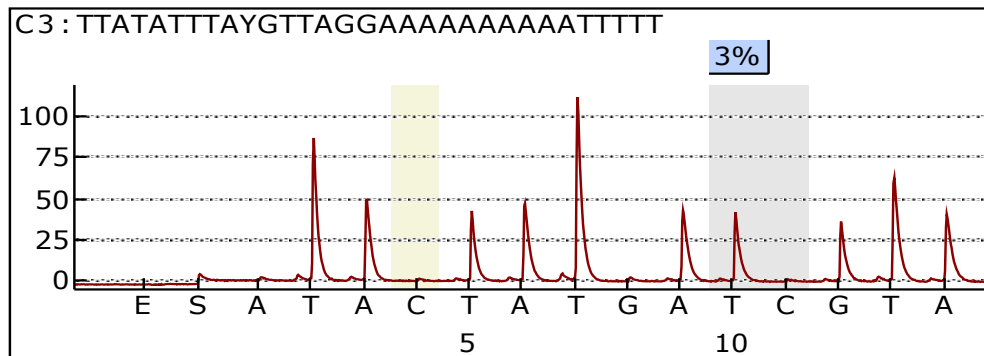

Assay Name: CZ-1  
Sample ID: 186  
Note:

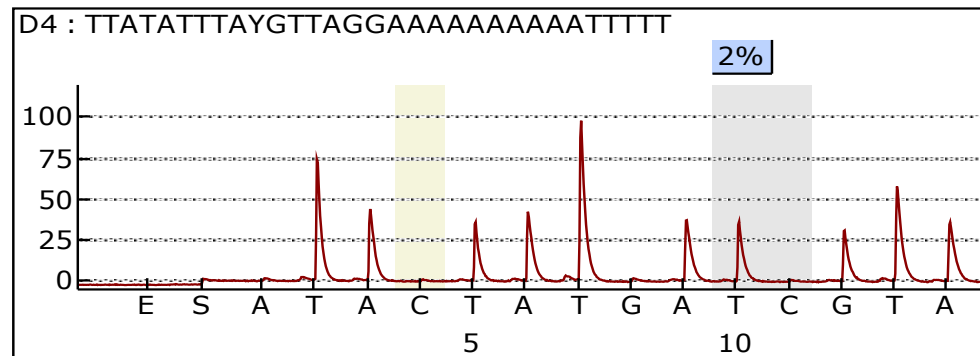

Assay Name: CZ-1  
Sample ID: 181  
Note:

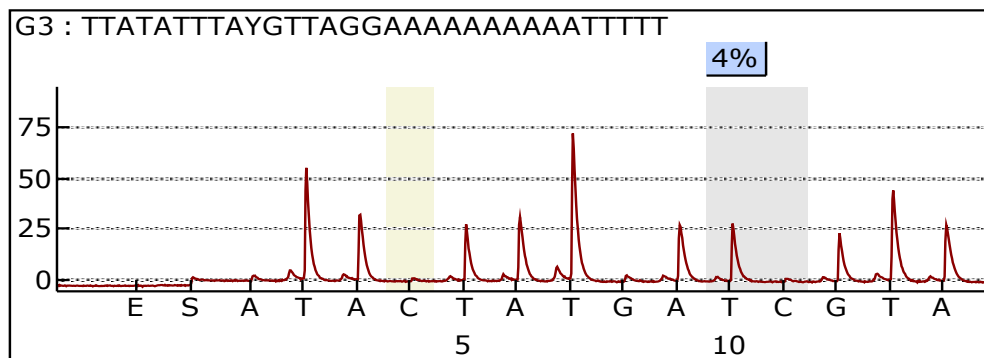

Assay Name: CZ-1  
Sample ID: 190  
Note:

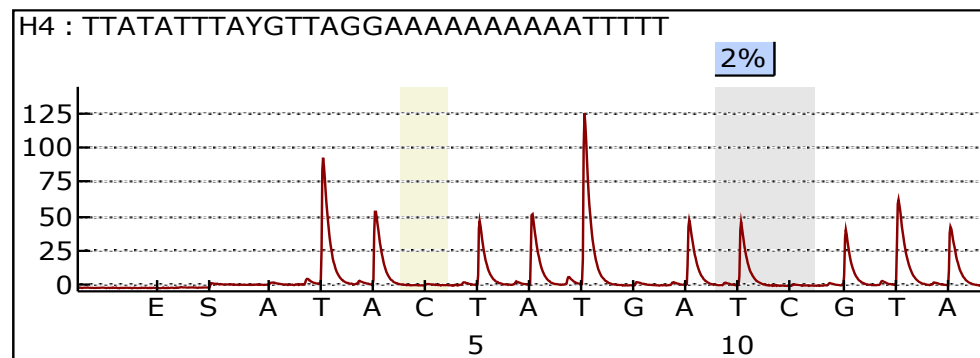

Assay Name: CZ-1  
Sample ID: 184  
Note:

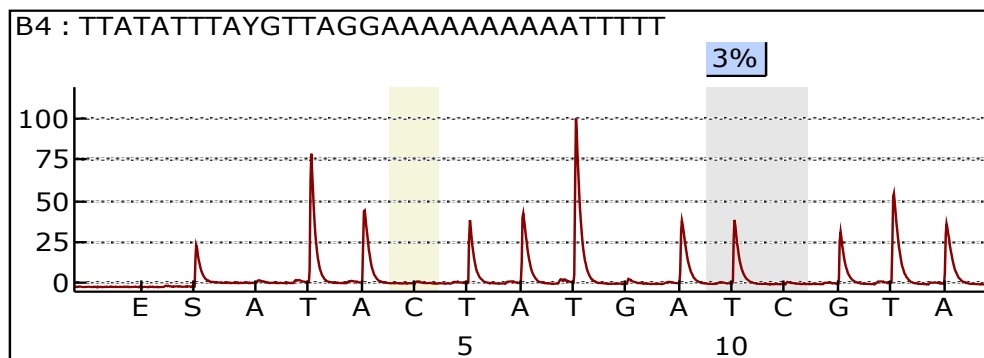

Assay Name: CZ-1  
Sample ID: 192  
Note:

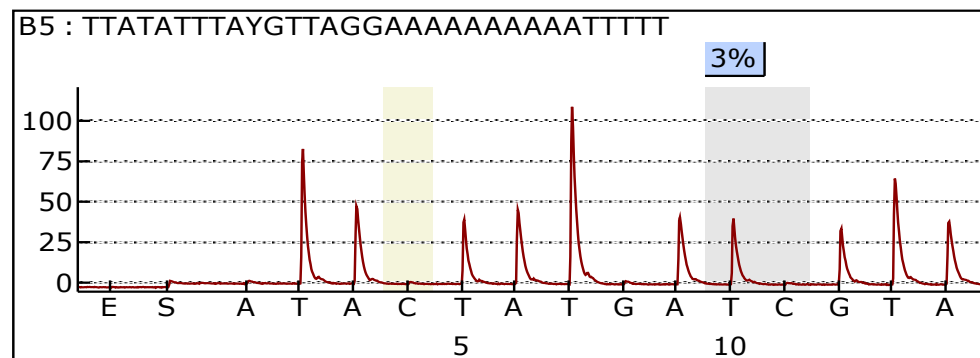



Assay Name: CZ-1  
Sample ID: 196  
Note:

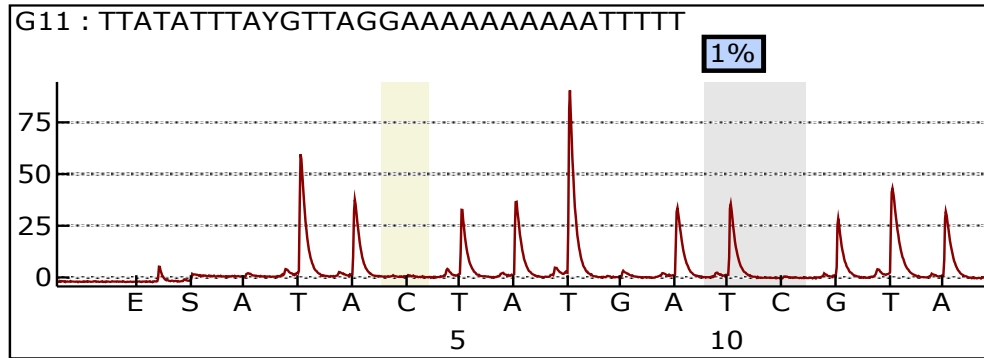

Assay Name: CZ-1  
Sample ID: 199  
Note:

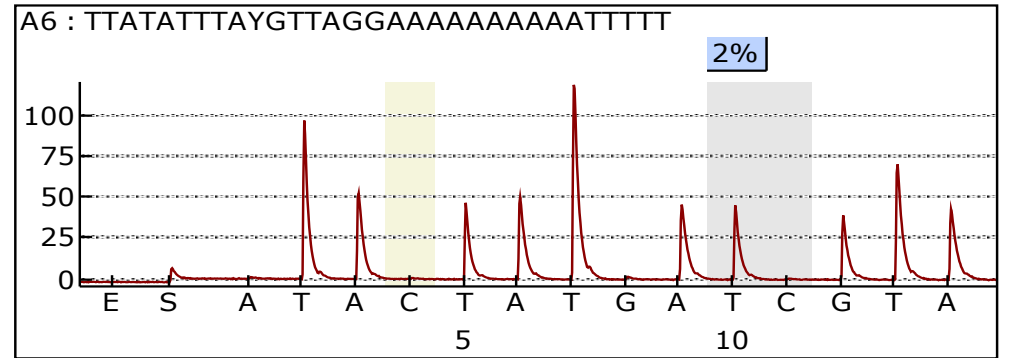

Assay Name: CZ-1  
Sample ID: 197  
Note:

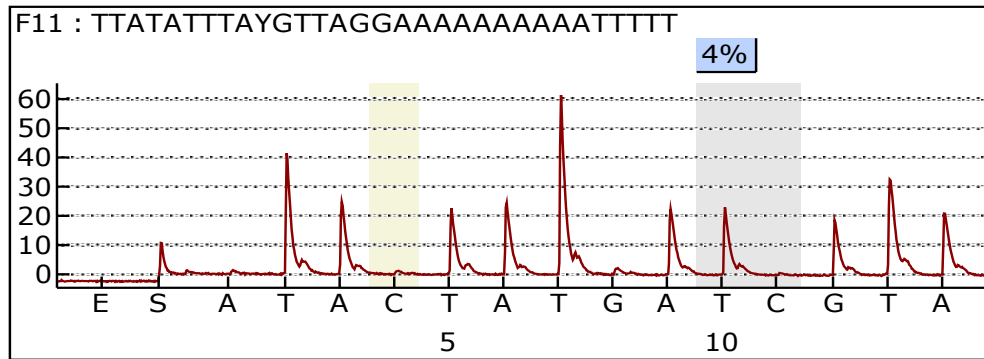

Assay Name: CZ-1  
Sample ID: 201  
Note:

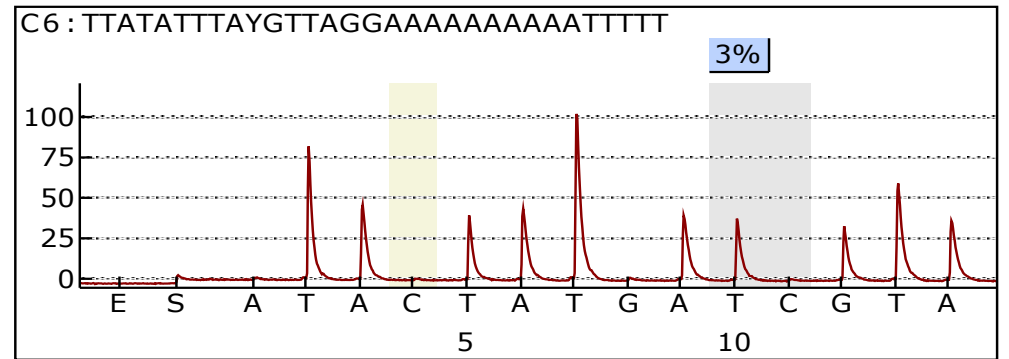

Assay Name: CZ-1  
Sample ID: 198  
Note:

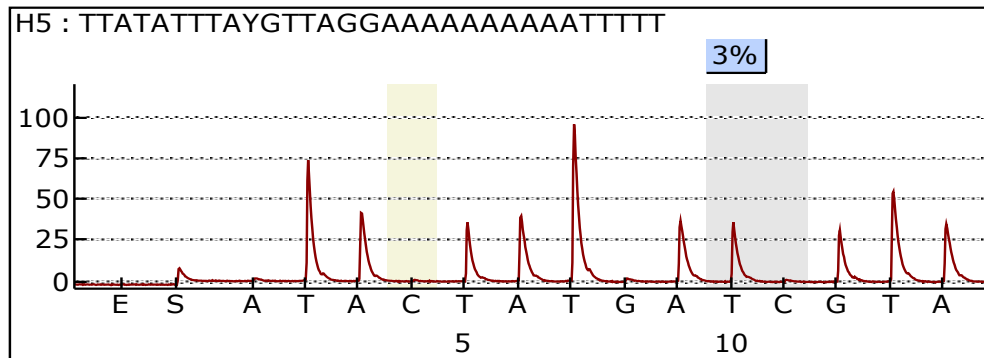

# Cg27539833

Assay Name: CZ-3  
Sample ID: 5  
Note:

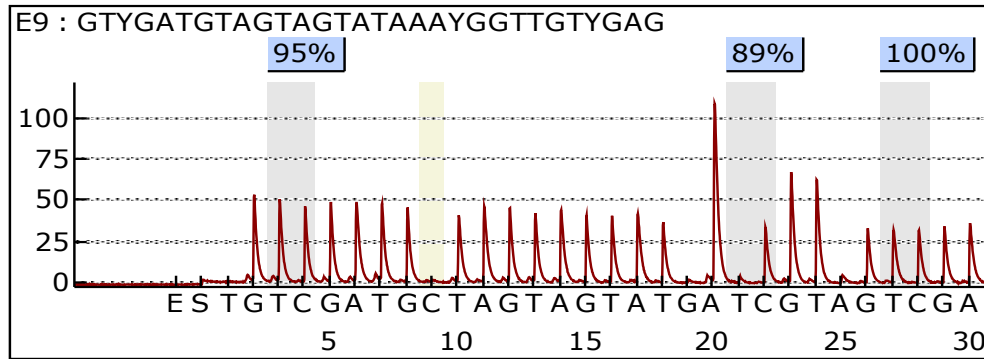

Assay Name: CZ-3  
Sample ID: 6  
Note:

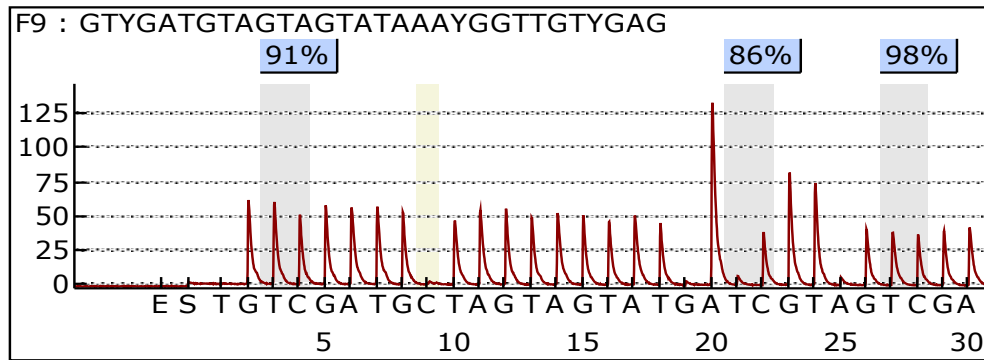

Assay Name: CZ-3  
Sample ID: 7  
Note:

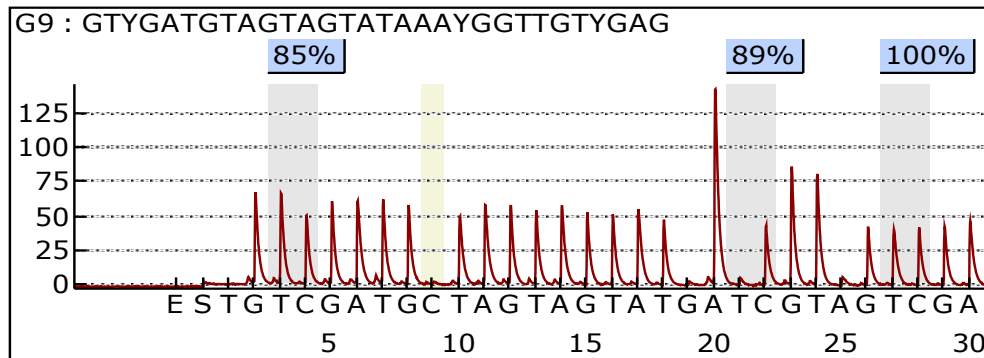

Assay Name: CZ-3  
Sample ID: 8  
Note:

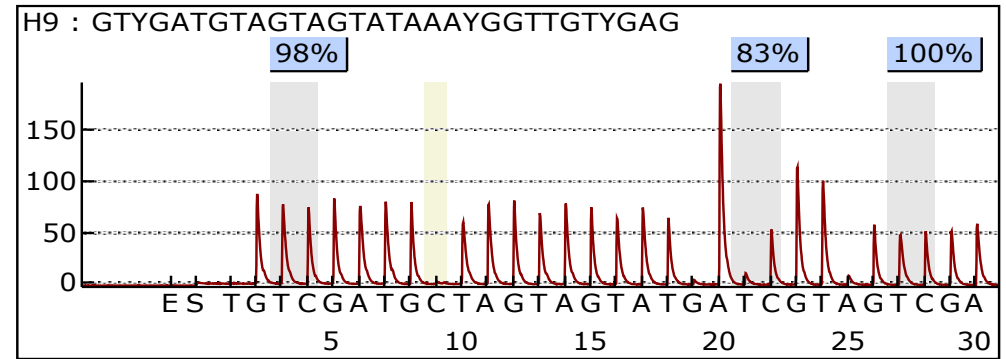

Assay Name: CZ-3  
Sample ID: 9  
Note:

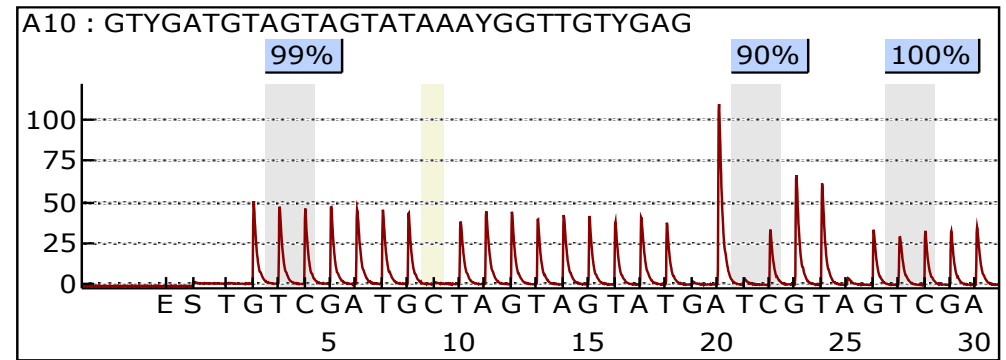

Assay Name: CZ-3  
Sample ID: 11  
Note:

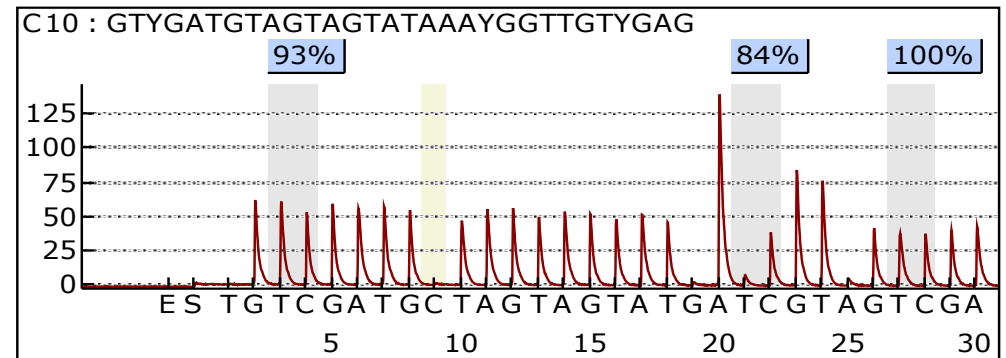

Assay Name: CZ-3  
Sample ID: 12  
Note:

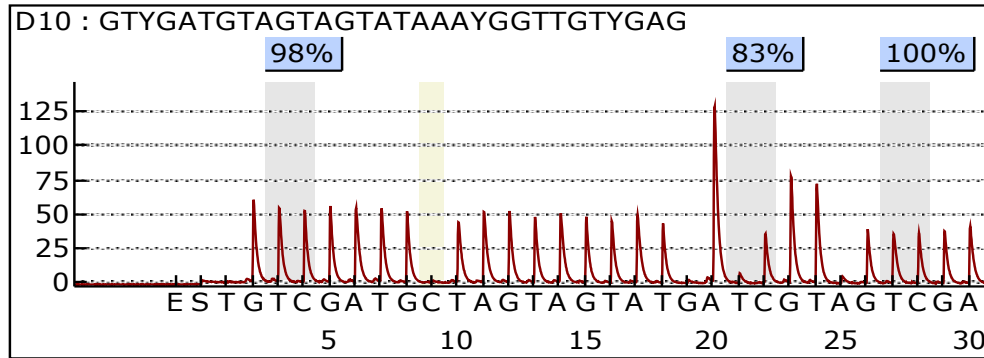

Assay Name: CZ-3  
Sample ID: 18  
Note:

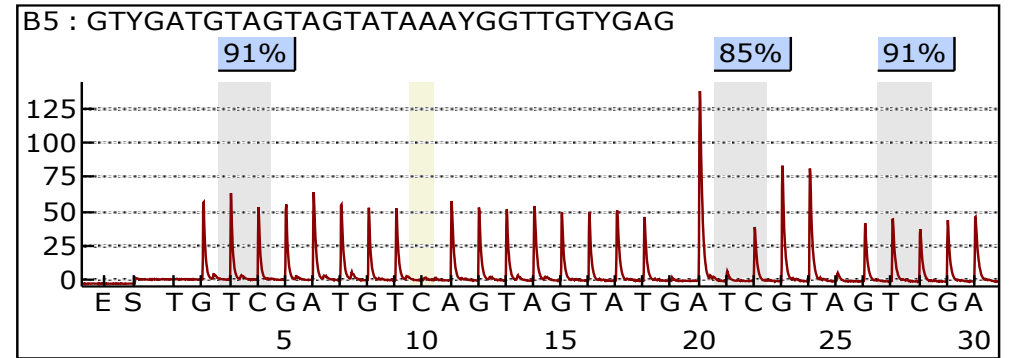

Assay Name: CZ-3  
Sample ID: 13  
Note:

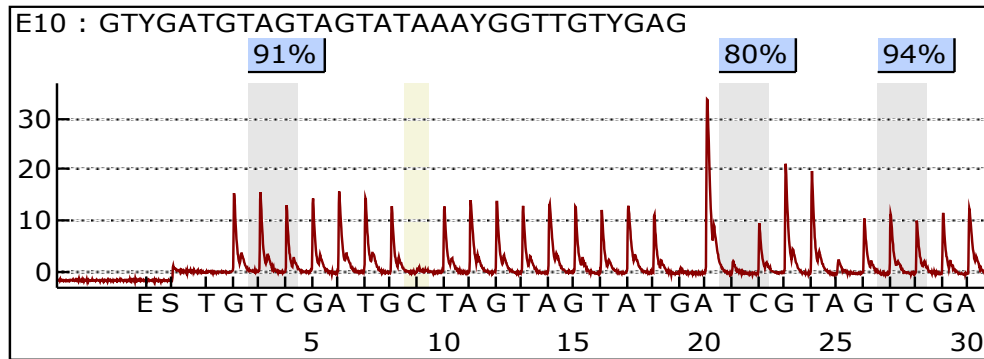

Assay Name: CZ-3  
Sample ID: 19  
Note:

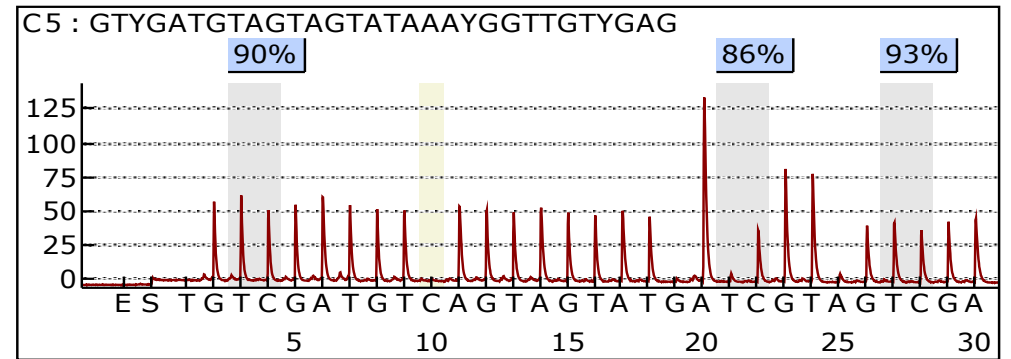

Assay Name: CZ-3  
Sample ID: 17  
Note:

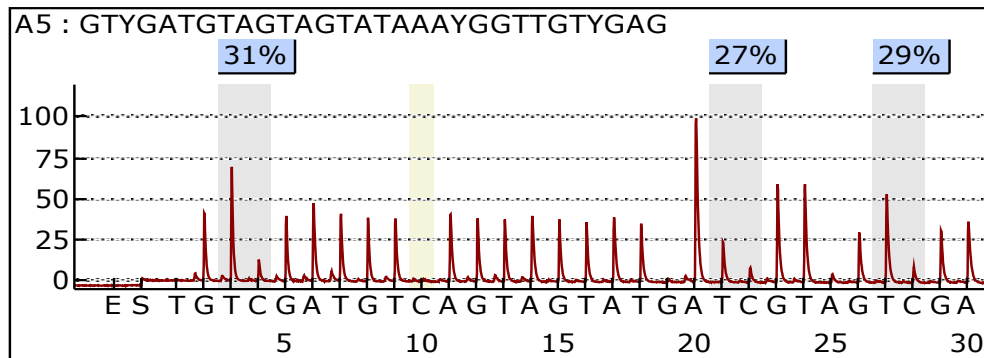

Assay Name: CZ-3  
Sample ID: 20  
Note:

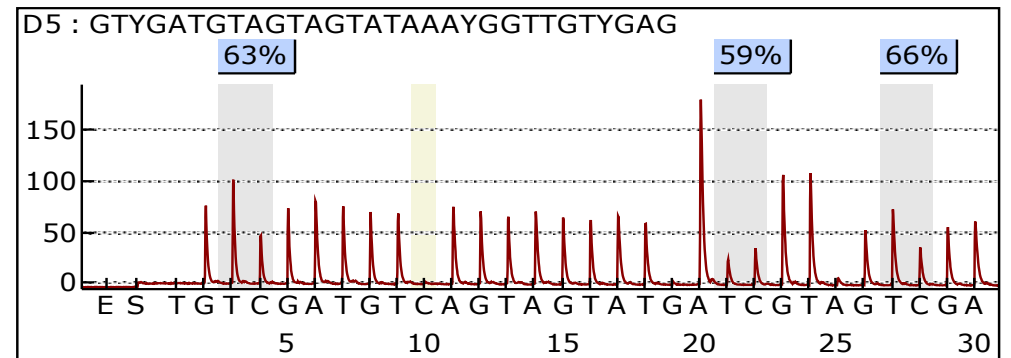

Assay Name: CZ-3  
Sample ID: 21  
Note:

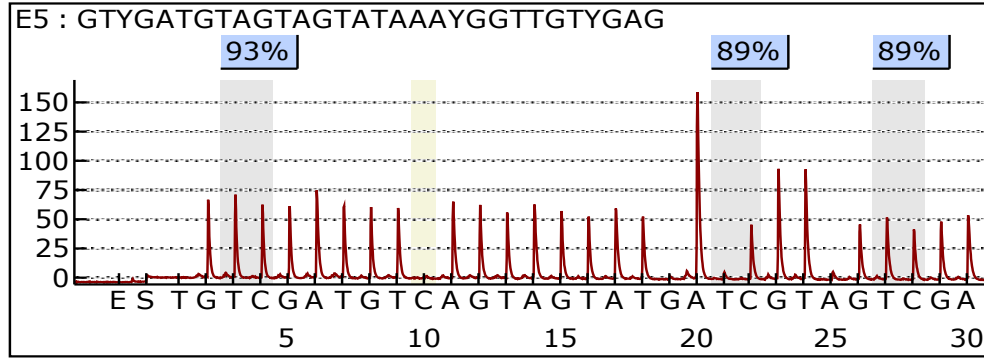

Assay Name: CZ-3  
Sample ID: 24  
Note:

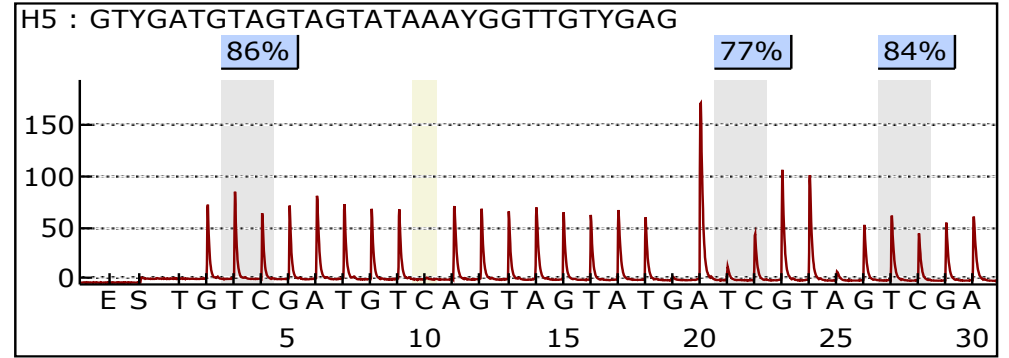

Assay Name: CZ-3  
Sample ID: 22  
Note:

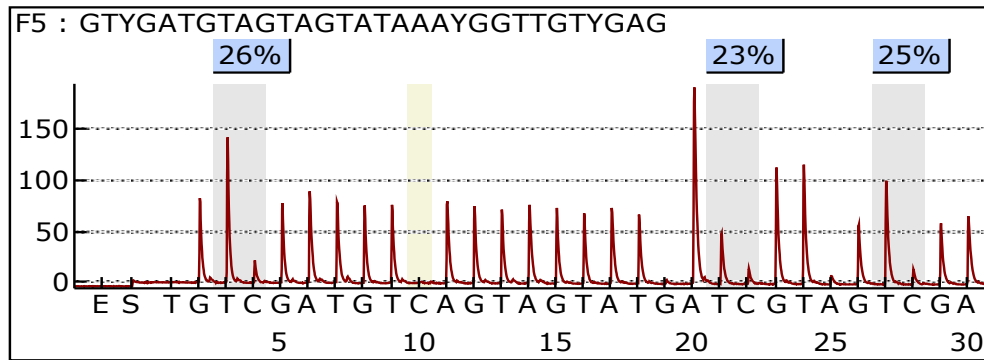

Assay Name: CZ-3  
Sample ID: 56  
Note:

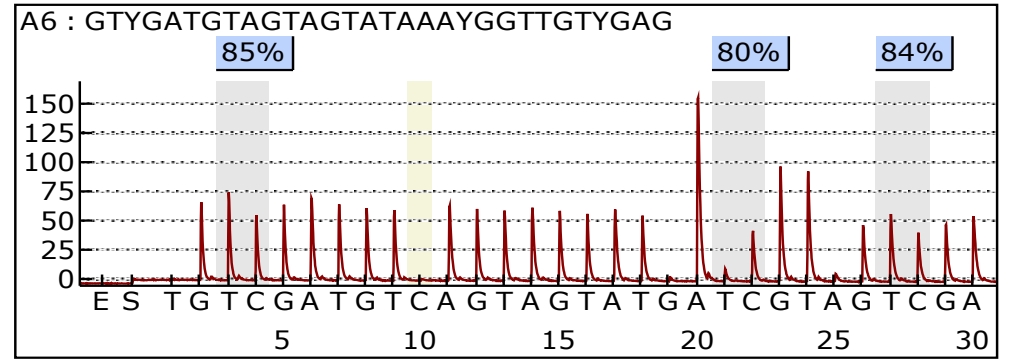

Assay Name: CZ-3  
Sample ID: 23  
Note:

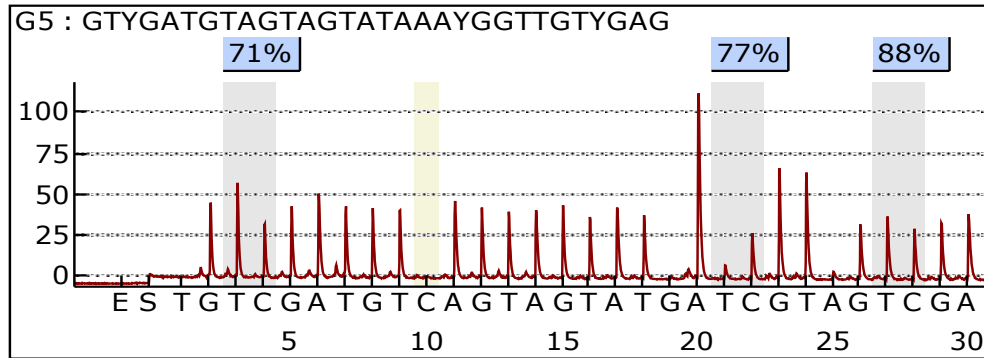

Assay Name: CZ-3  
Sample ID: 57  
Note:

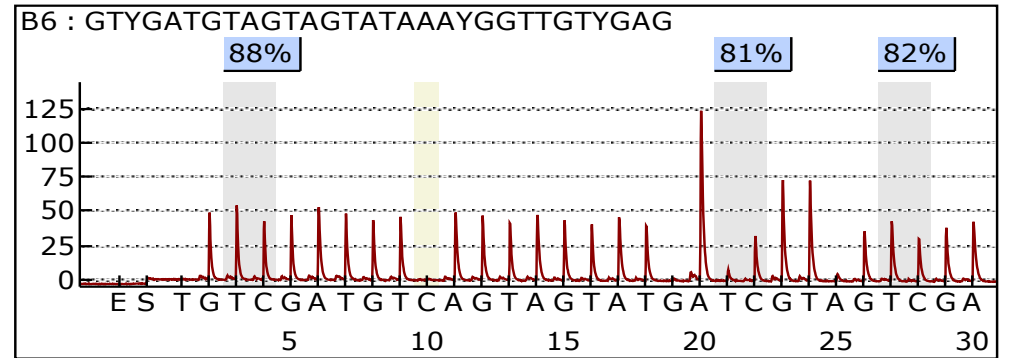

Assay Name: CZ-3  
Sample ID: 58  
Note:

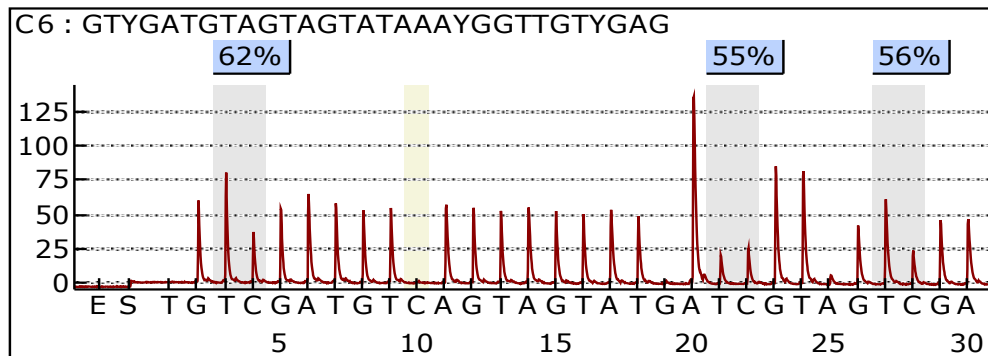

Assay Name: CZ-3  
Sample ID: 61  
Note:

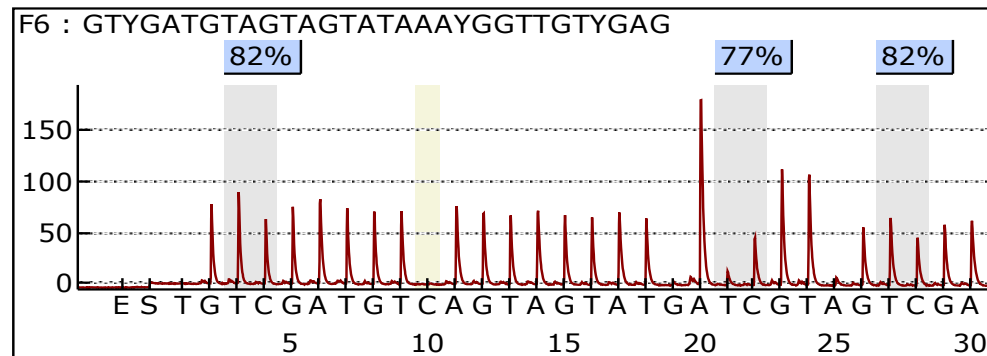

Assay Name: CZ-3  
Sample ID: 59  
Note:

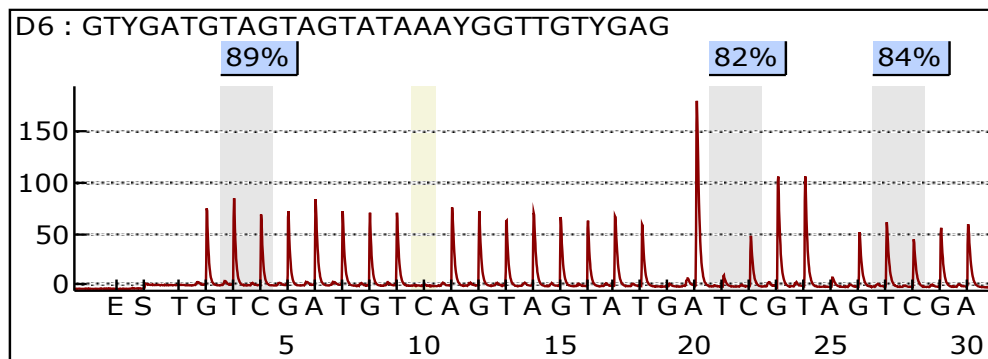

Assay Name: CZ-3  
Sample ID: 62  
Note:

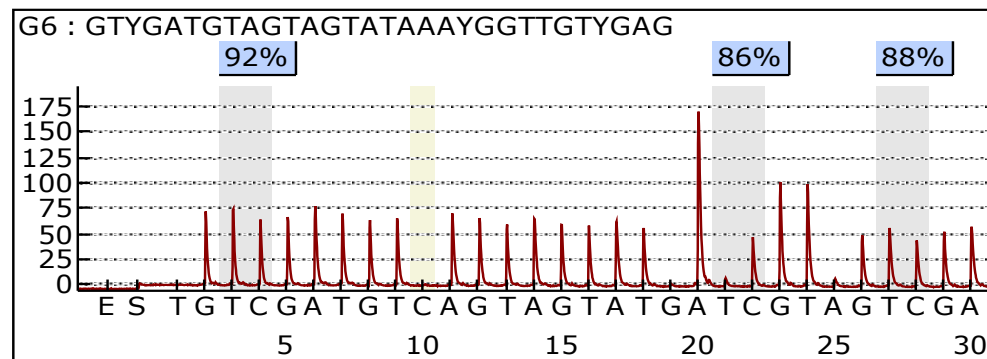

Assay Name: CZ-3  
Sample ID: 60  
Note:

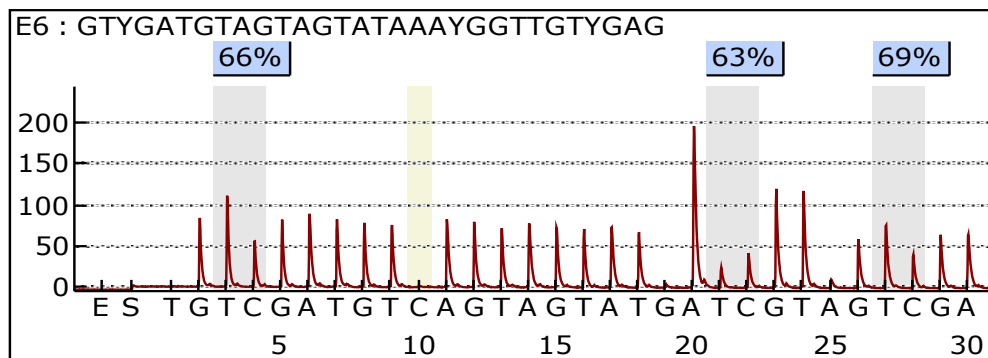

Assay Name: CZ-3  
Sample ID: 63  
Note:

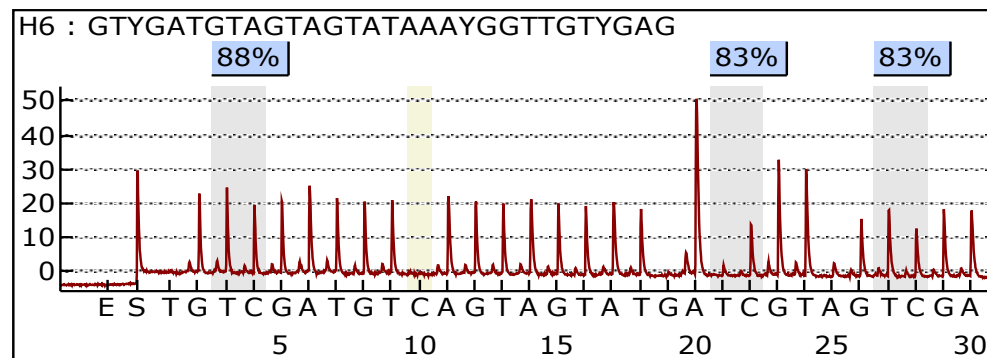

Assay Name: CZ-3  
Sample ID: 64  
Note:

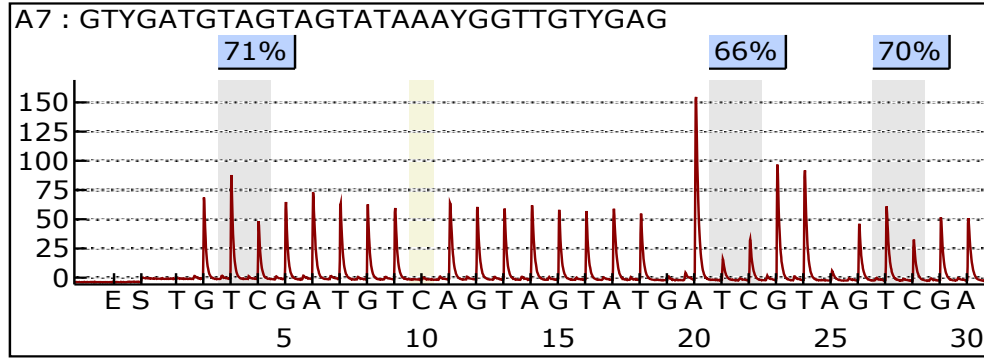

Assay Name: CZ-3  
Sample ID: 67  
Note:

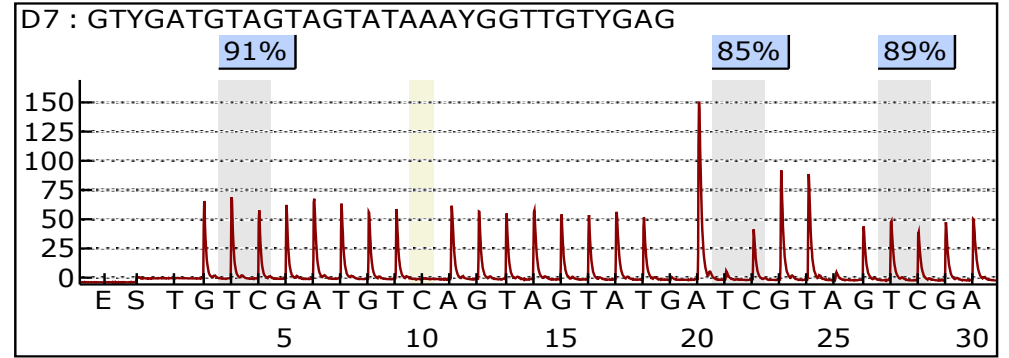

Assay Name: CZ-3  
Sample ID: 65  
Note:

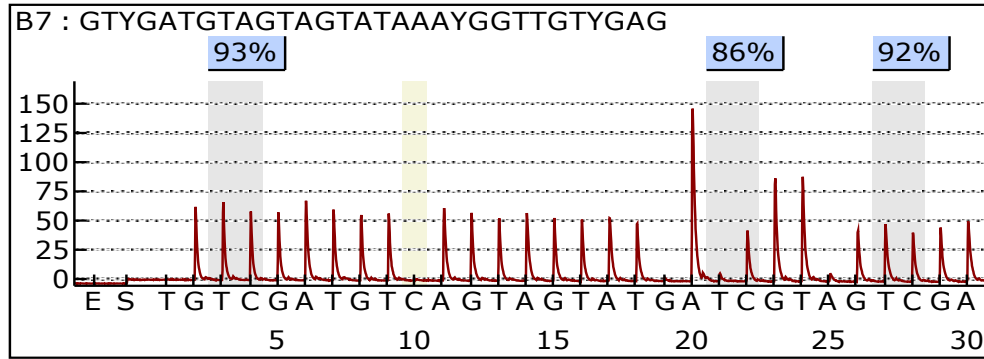

Assay Name: CZ-3  
Sample ID: 68  
Note:

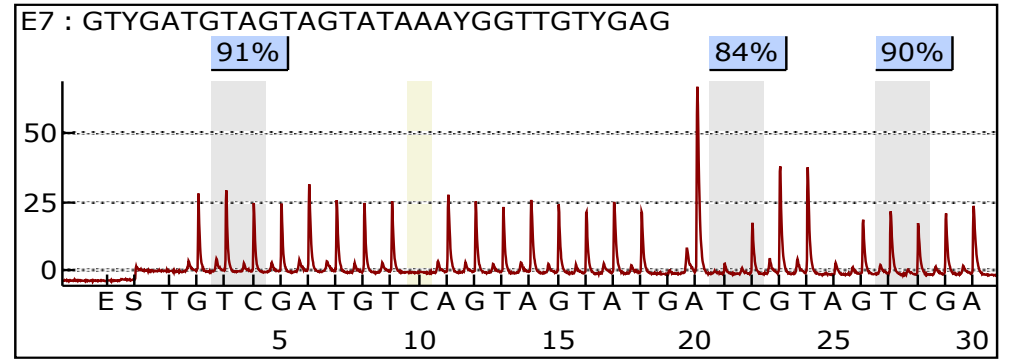

Assay Name: CZ-3  
Sample ID: 66  
Note:

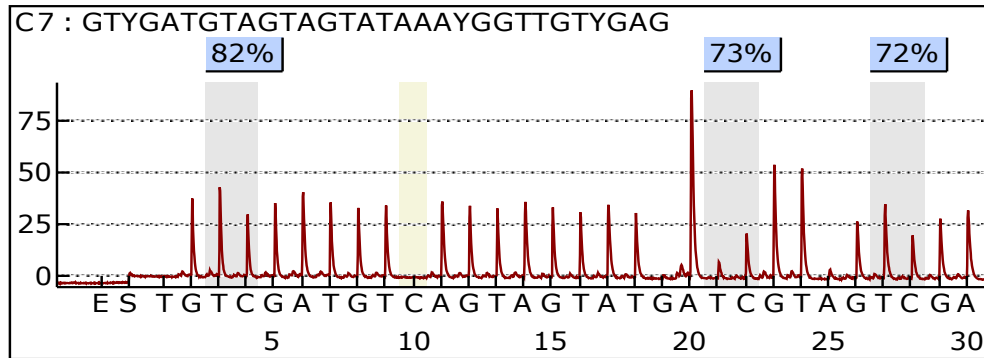

Assay Name: CZ-3  
Sample ID: 69  
Note:

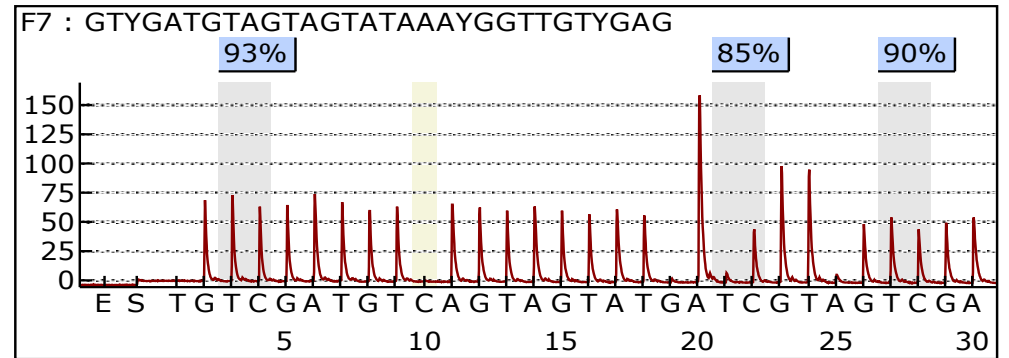

Assay Name: CZ-3  
Sample ID: 70  
Note:

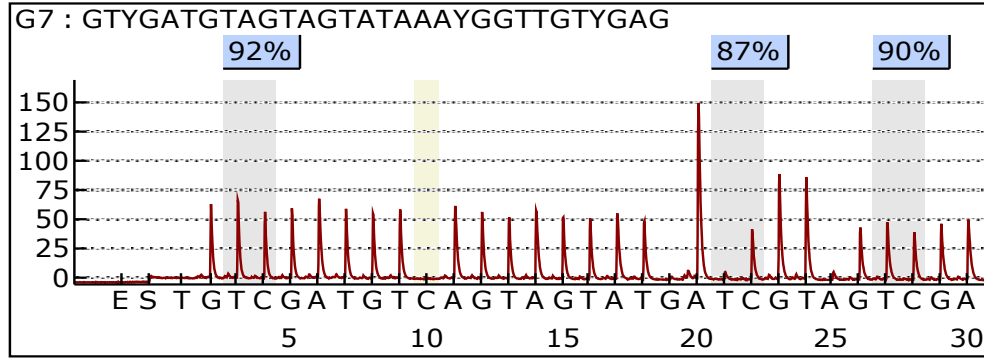

Assay Name: CZ-3  
Sample ID: 73  
Note:

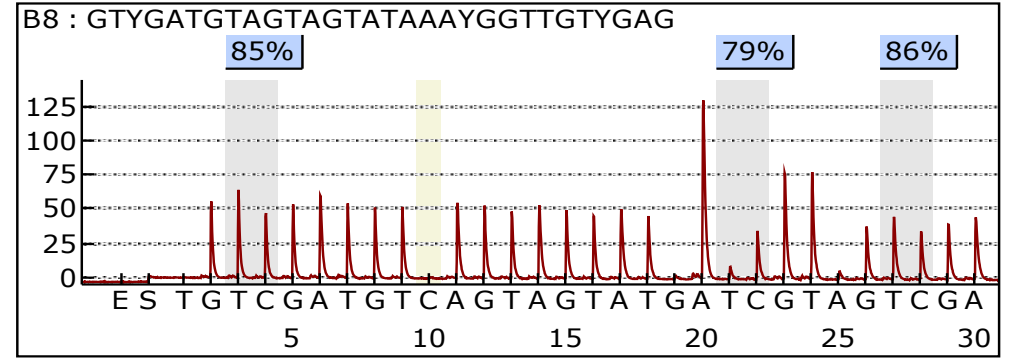

Assay Name: CZ-3  
Sample ID: 71  
Note:

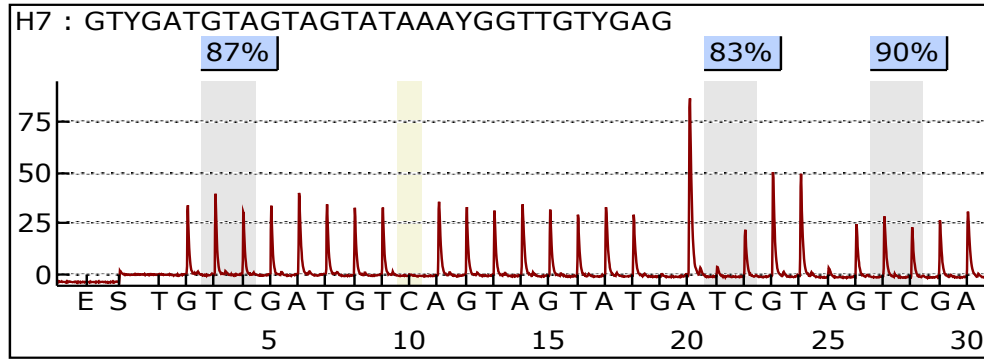

Assay Name: CZ-3  
Sample ID: 74  
Note:

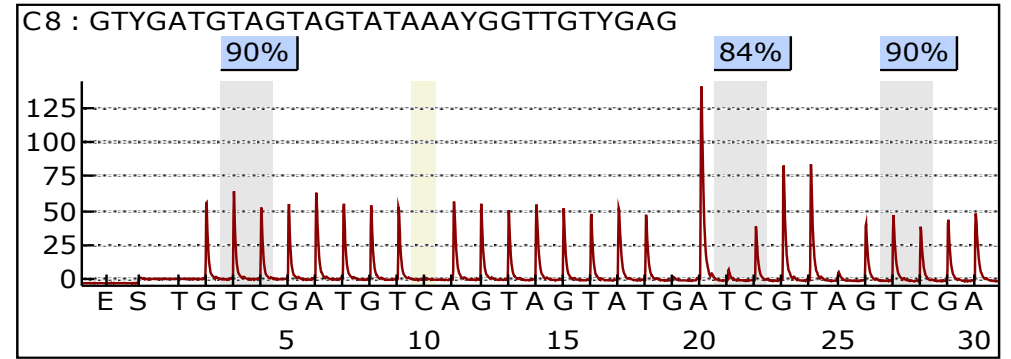

Assay Name: CZ-3  
Sample ID: 72  
Note:

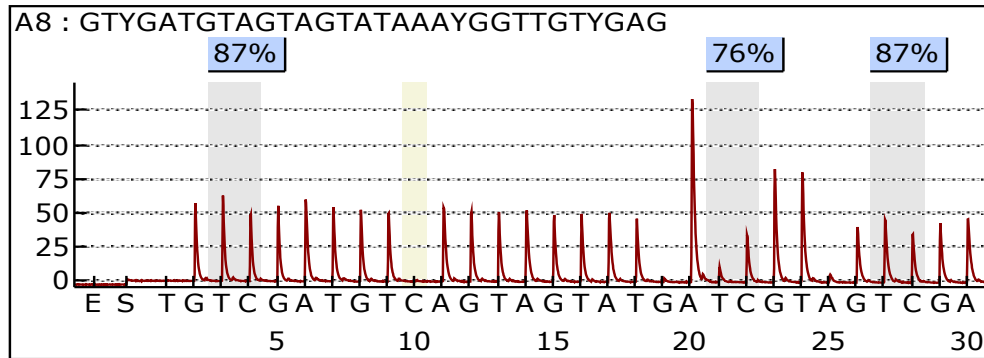

Assay Name: CZ-3  
Sample ID: 75  
Note:

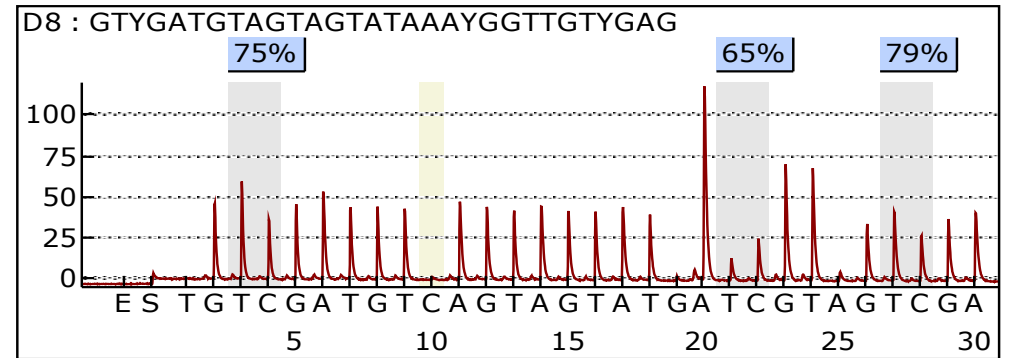

Assay Name: CZ-3  
Sample ID: 76  
Note:

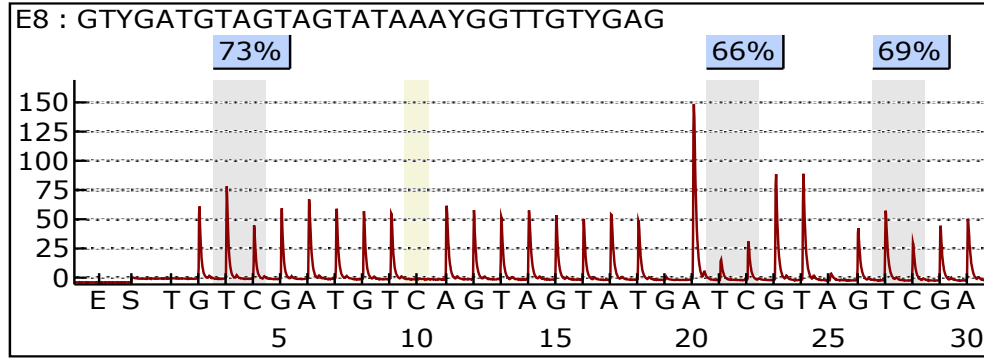

Assay Name: CZ-3  
Sample ID: 1  
Note:

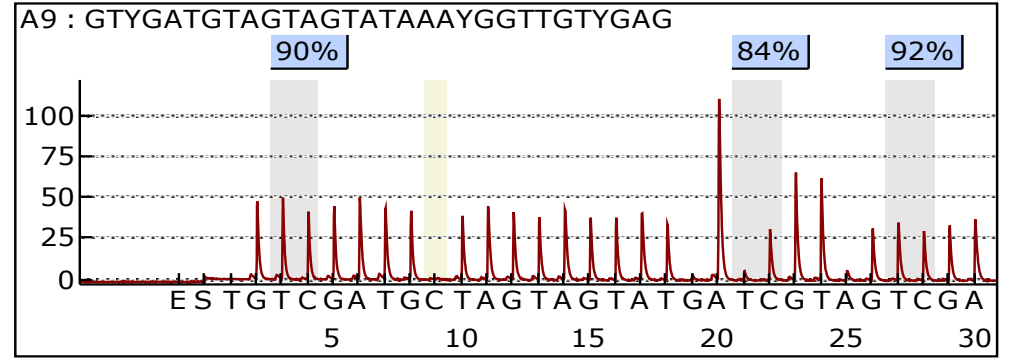

Assay Name: CZ-3  
Sample ID: 77  
Note:

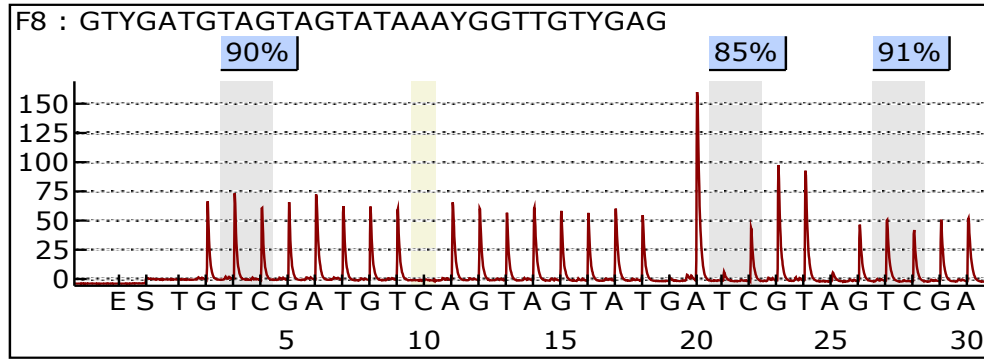

Assay Name: CZ-3  
Sample ID: 2  
Note:

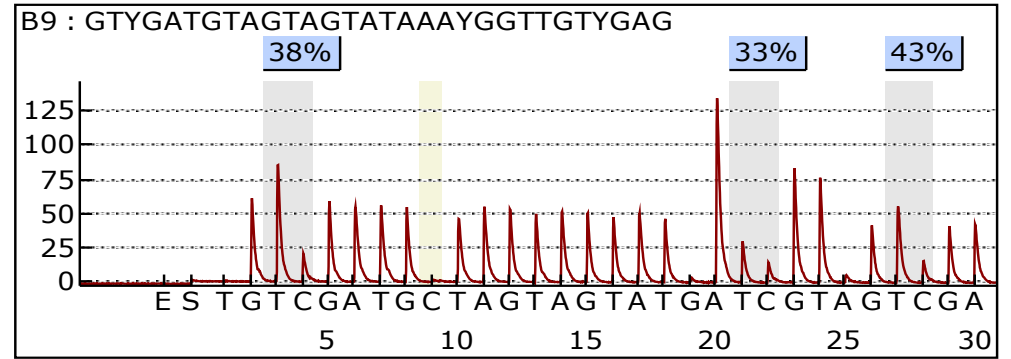

Assay Name: CZ-3  
Sample ID: 3  
Note:

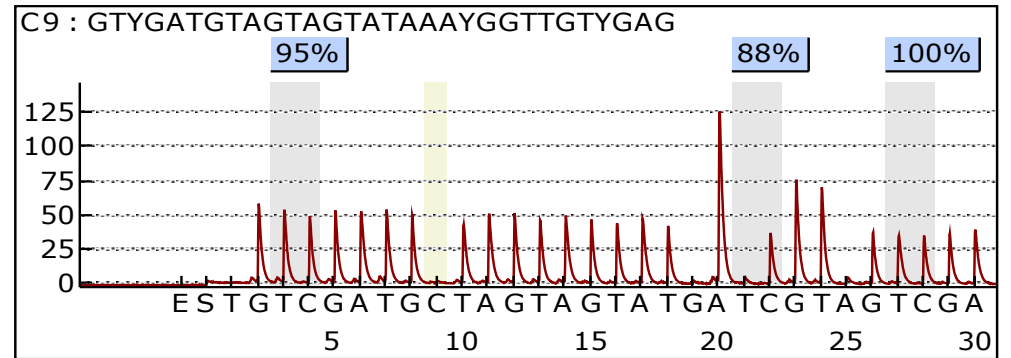



Assay Name: CZ-3  
Sample ID: 4  
Note:

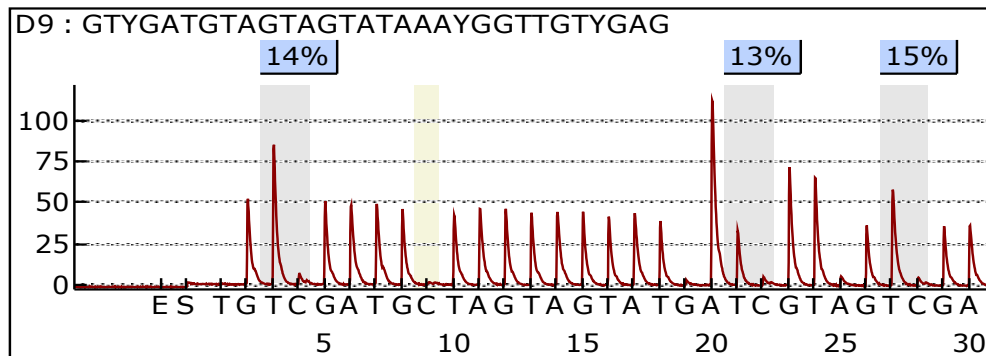

Assay Name: CZ-3  
Sample ID: 15  
Note:

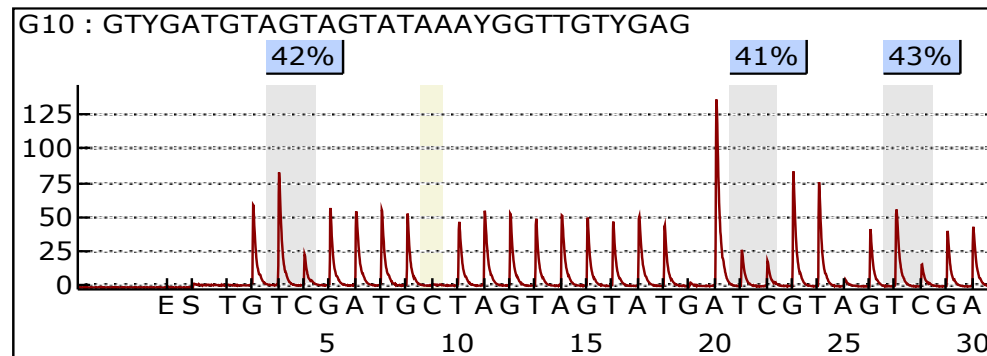

Assay Name: CZ-3  
Sample ID: 10  
Note:

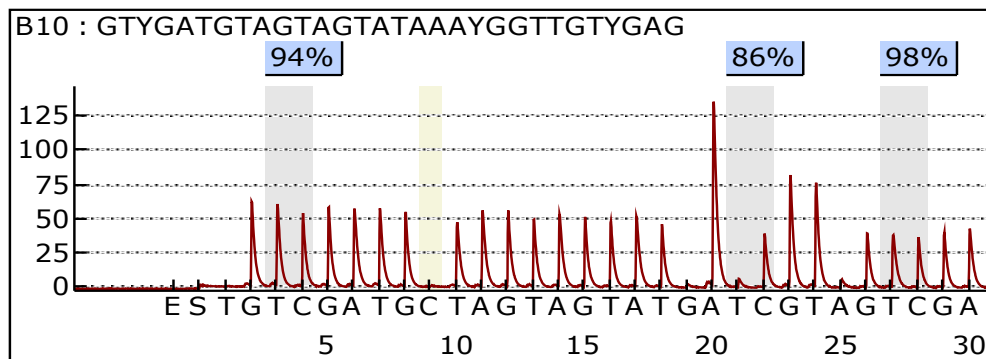

Assay Name: CZ-3  
Sample ID: 16  
Note:

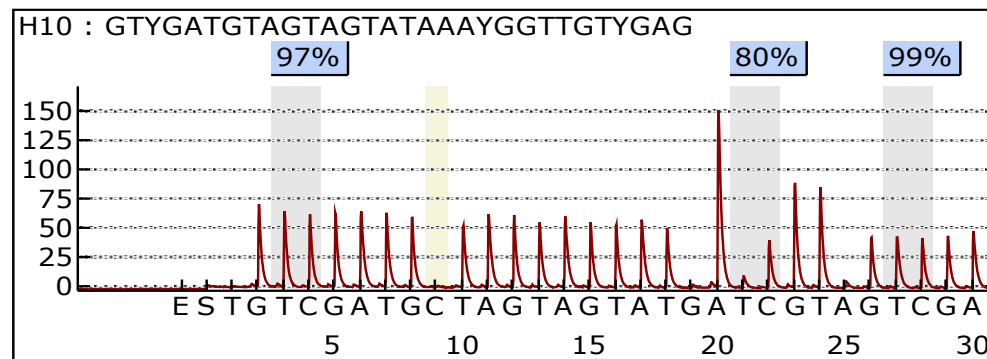

Assay Name: CZ-3  
Sample ID: 14  
Note:

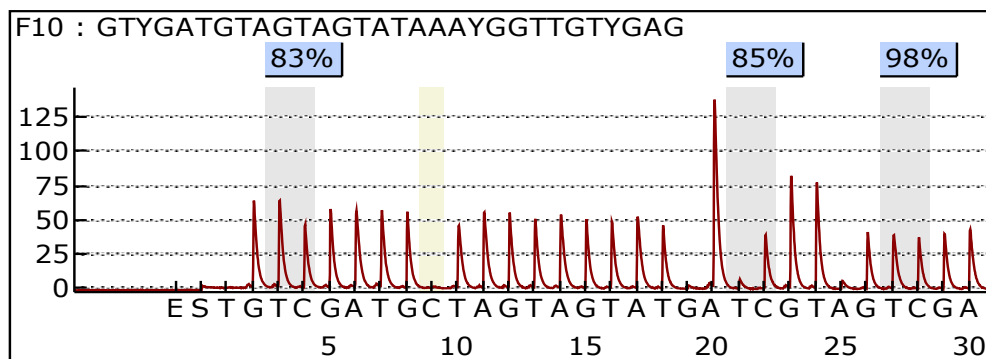

Assay Name: CZ-3  
Sample ID: 25  
Note:

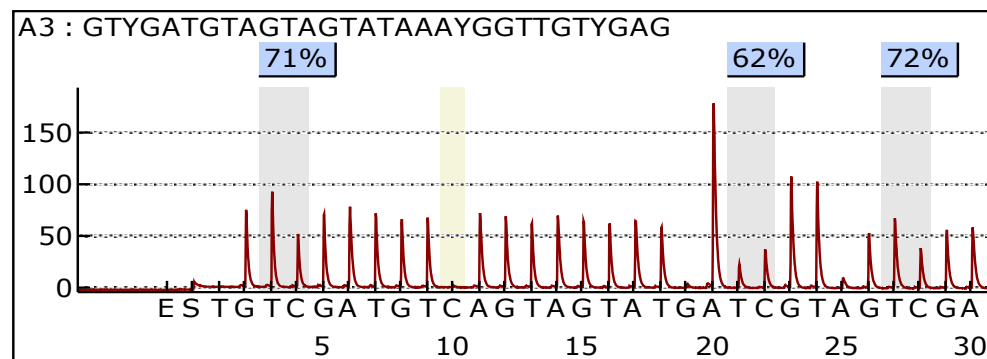

Assay Name: CZ-3  
Sample ID: 26  
Note:

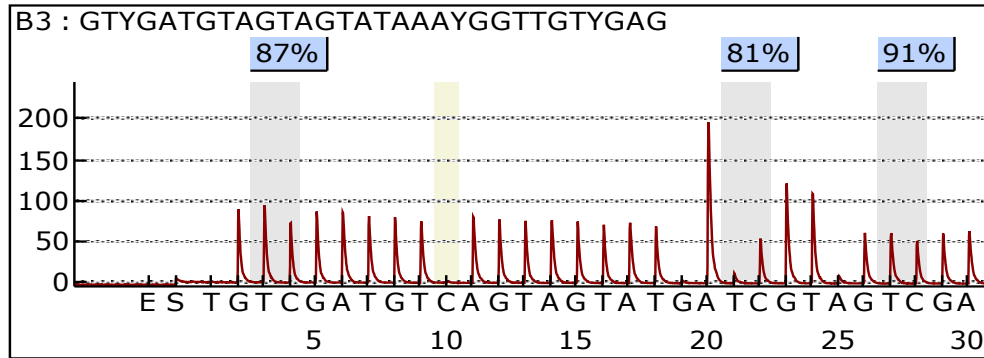

Assay Name: CZ-3  
Sample ID: 29  
Note:

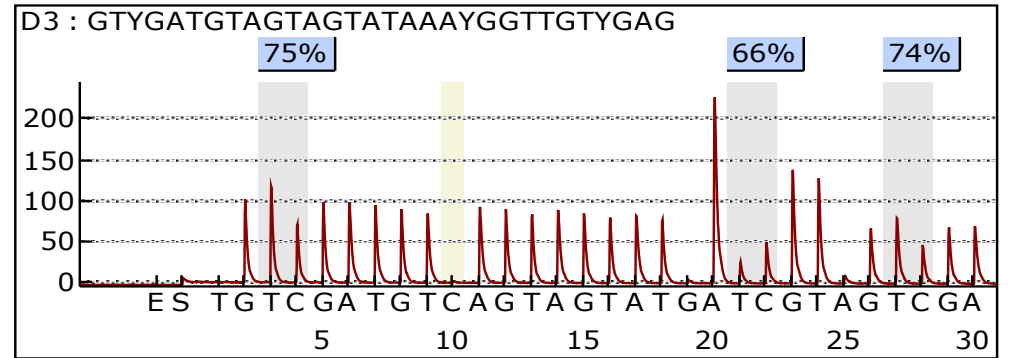

Assay Name: CZ-3  
Sample ID: 27  
Note:

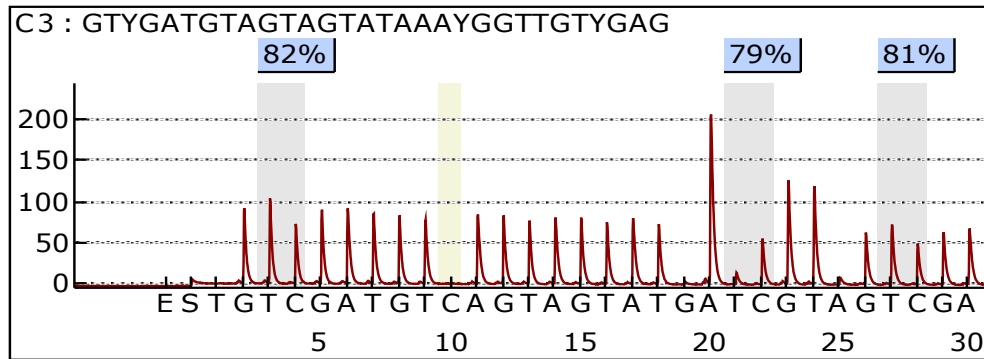

Assay Name: CZ-3  
Sample ID: 30  
Note:

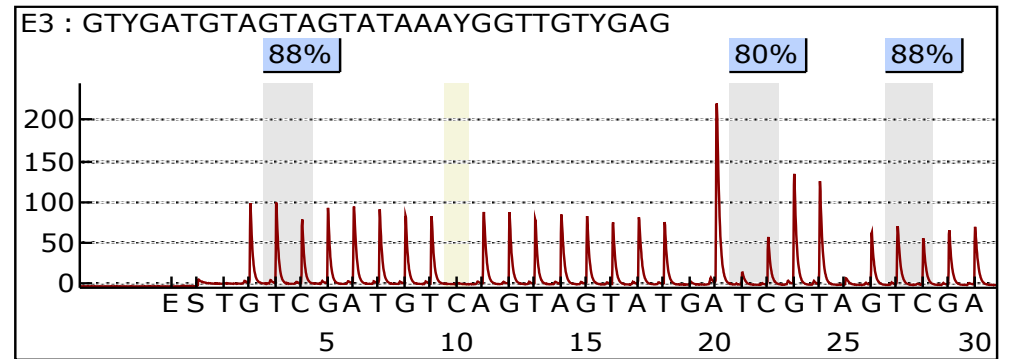

Assay Name: CZ-3  
Sample ID: 28  
Note:

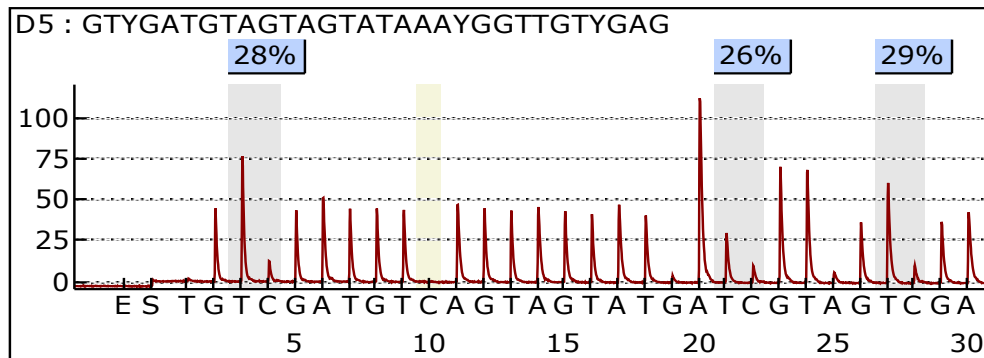

Assay Name: CZ-3  
Sample ID: 31  
Note:

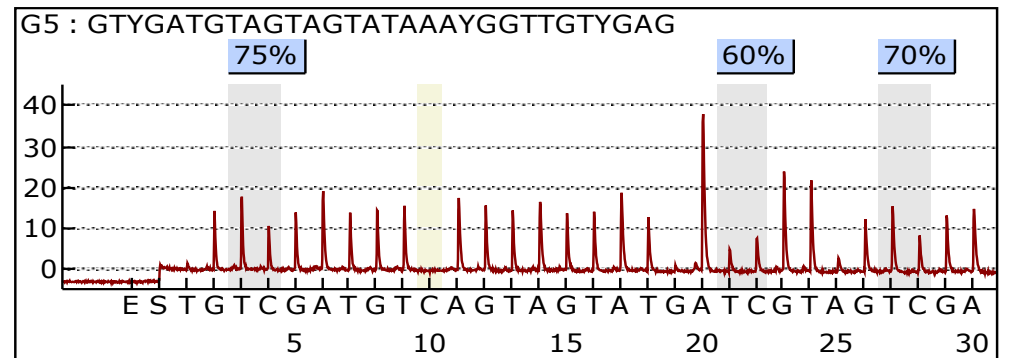

Assay Name: CZ-3  
Sample ID: 32  
Note:

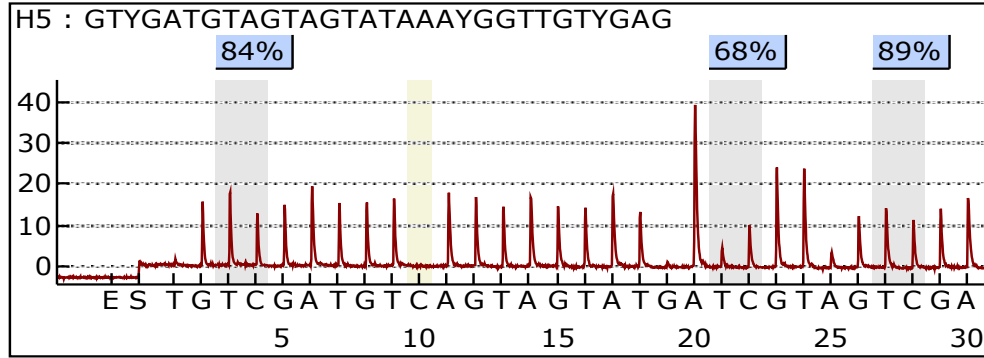

Assay Name: CZ-3  
Sample ID: 36  
Note:

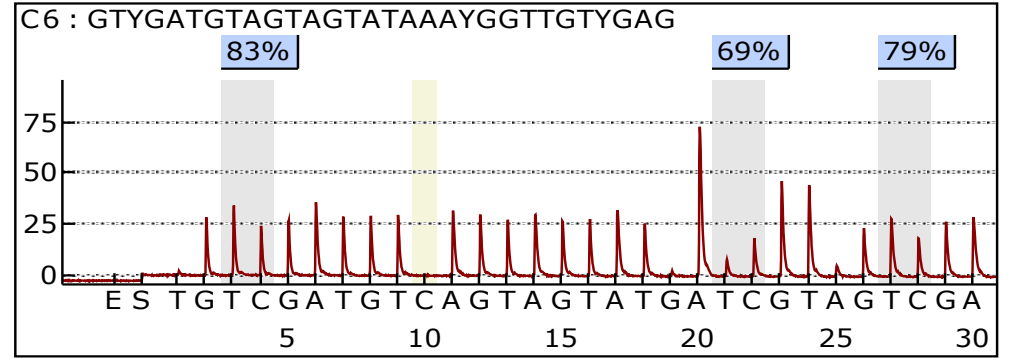

Assay Name: CZ-3  
Sample ID: 34  
Note:

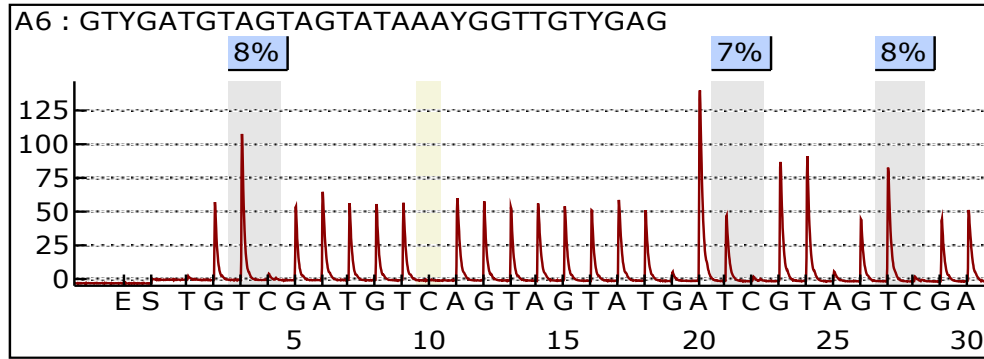

Assay Name: CZ-3  
Sample ID: 37  
Note:

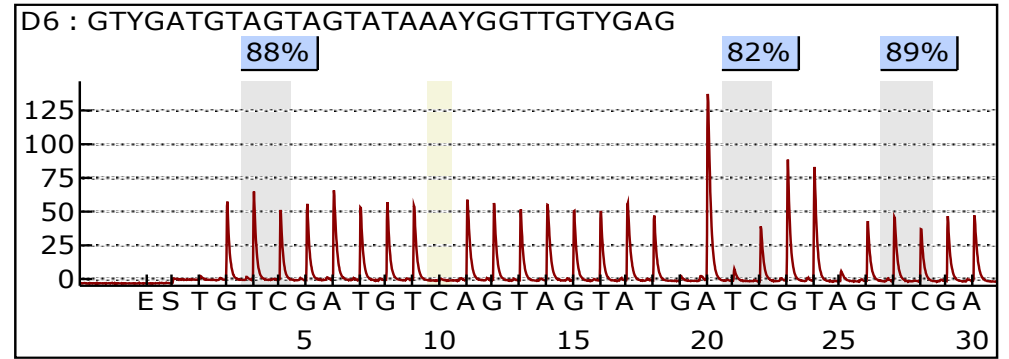

Assay Name: CZ-3  
Sample ID: 35  
Note:

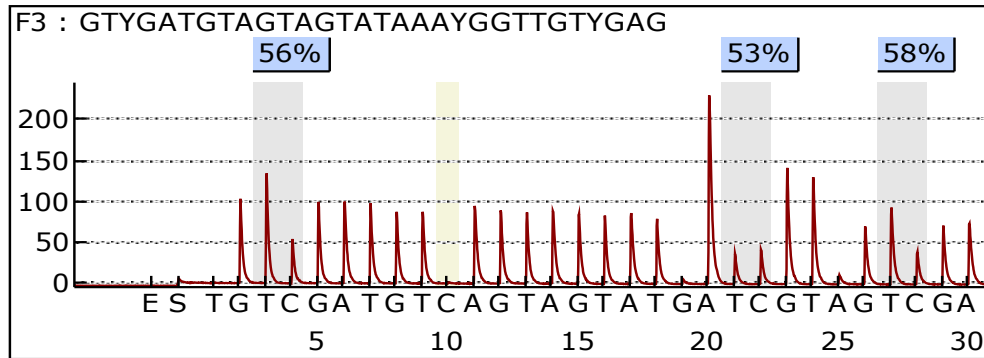

Assay Name: CZ-3  
Sample ID: 38  
Note:

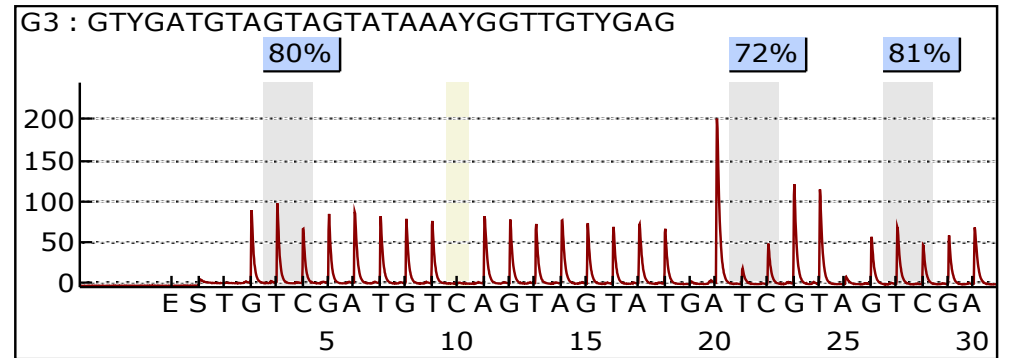

Assay Name: CZ-3  
Sample ID: 39  
Note:

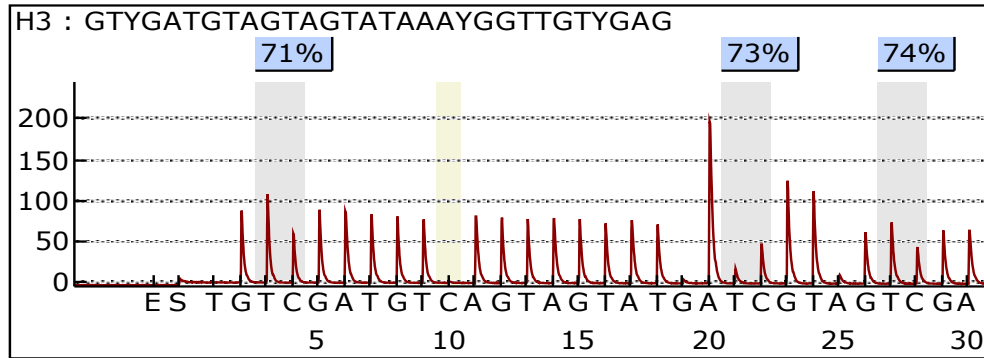

Assay Name: CZ-3  
Sample ID: 42  
Note:

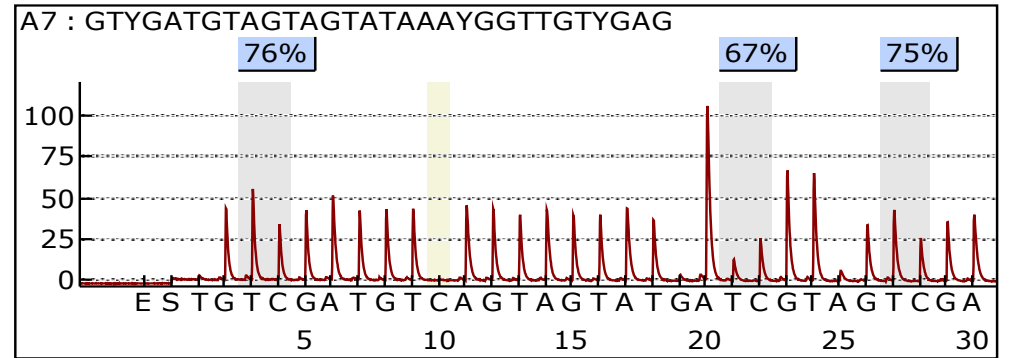

Assay Name: CZ-3  
Sample ID: 40  
Note:

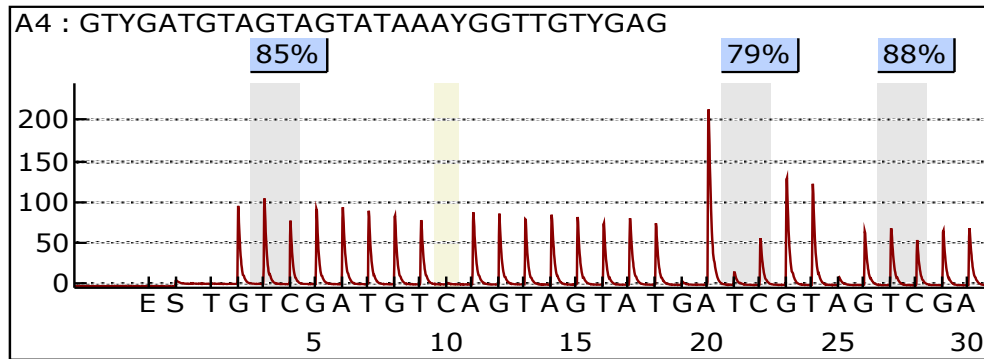

Assay Name: CZ-3  
Sample ID: 43  
Note:

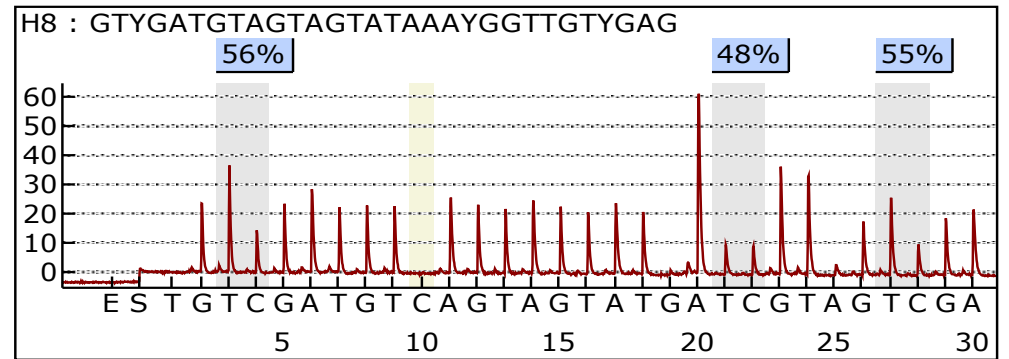

Assay Name: CZ-3  
Sample ID: 41  
Note:

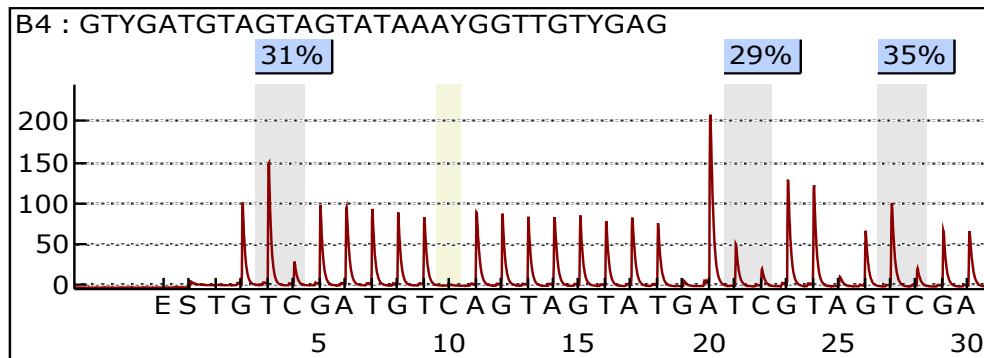

Assay Name: CZ-3  
Sample ID: 44  
Note:

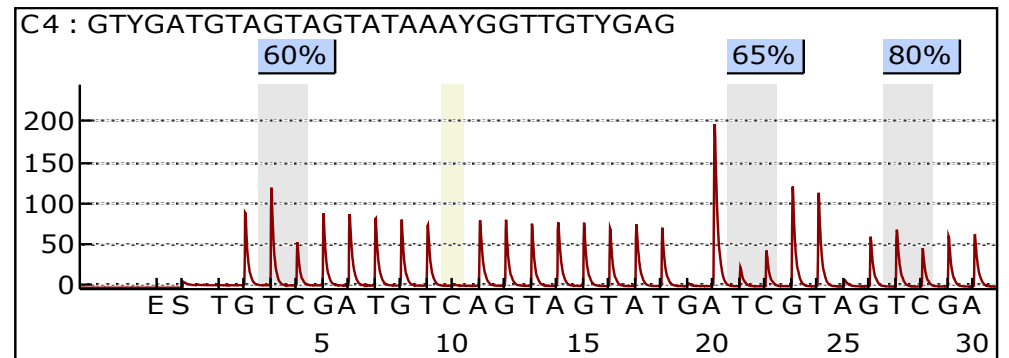

Assay Name: CZ-3  
Sample ID: 45  
Note:

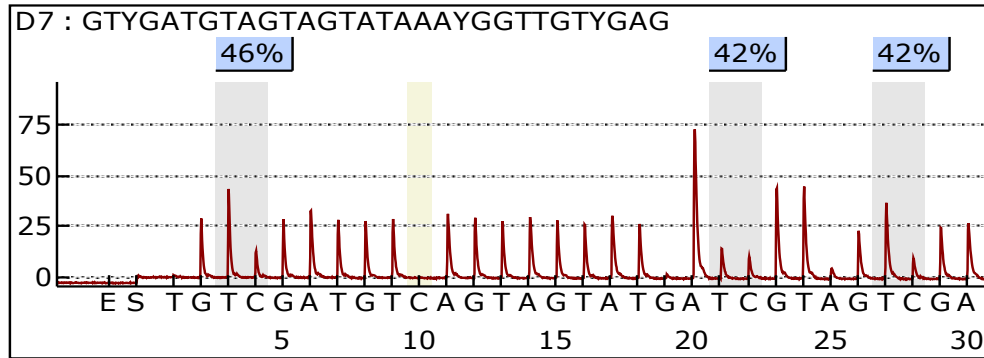

Assay Name: CZ-3  
Sample ID: 48  
Note:

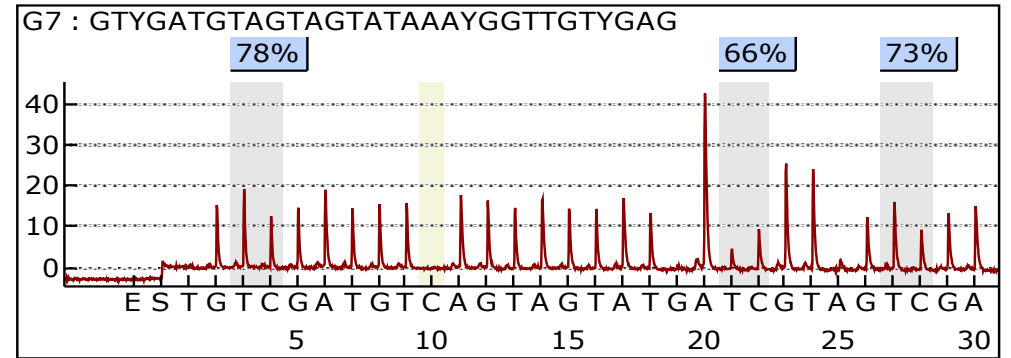

Assay Name: CZ-3  
Sample ID: 46  
Note:

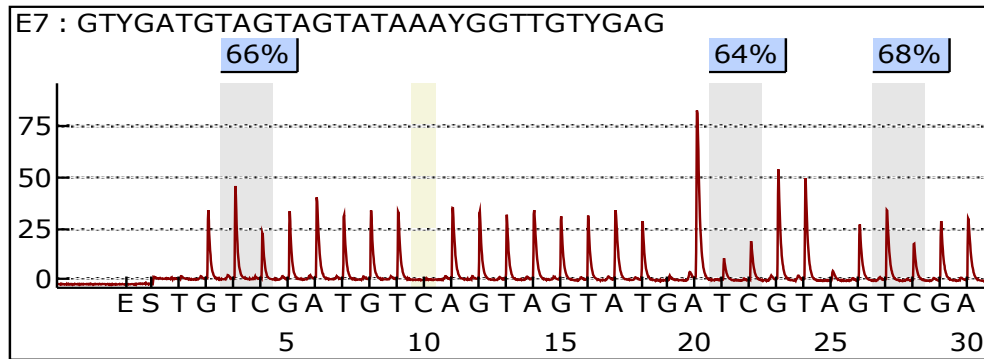

Assay Name: CZ-3  
Sample ID: 49  
Note:

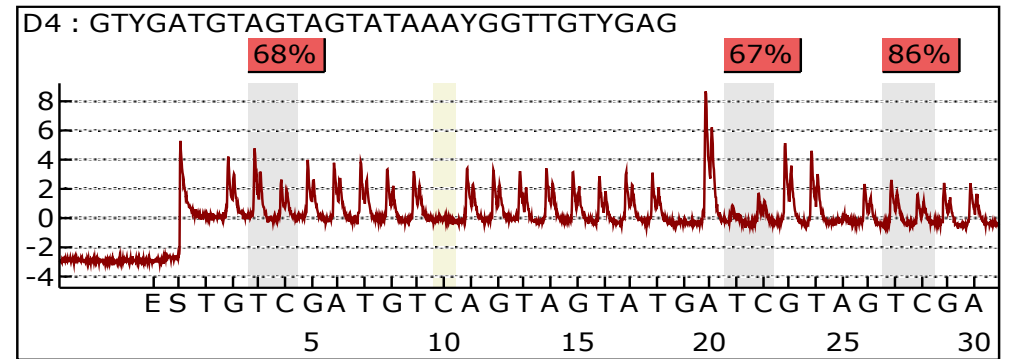

Assay Name: CZ-3  
Sample ID: 47  
Note:

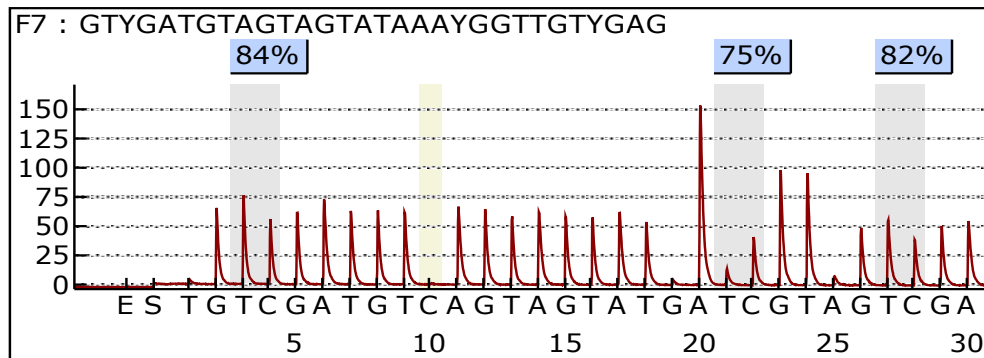

Assay Name: CZ-3  
Sample ID: 50  
Note:

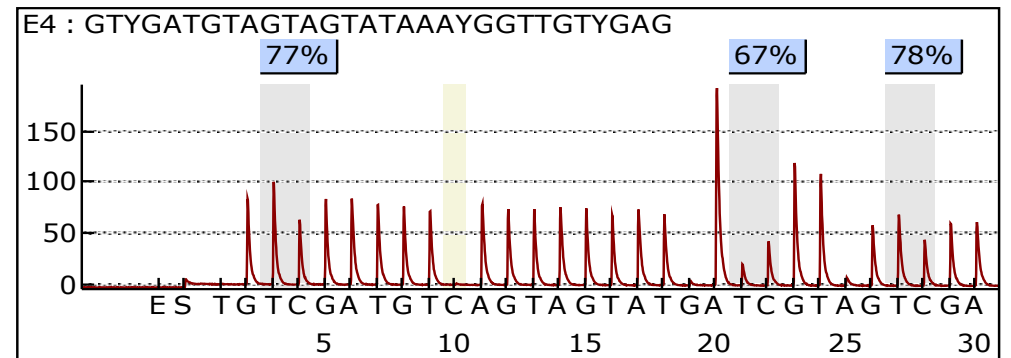

Assay Name: CZ-3  
Sample ID: 51  
Note:

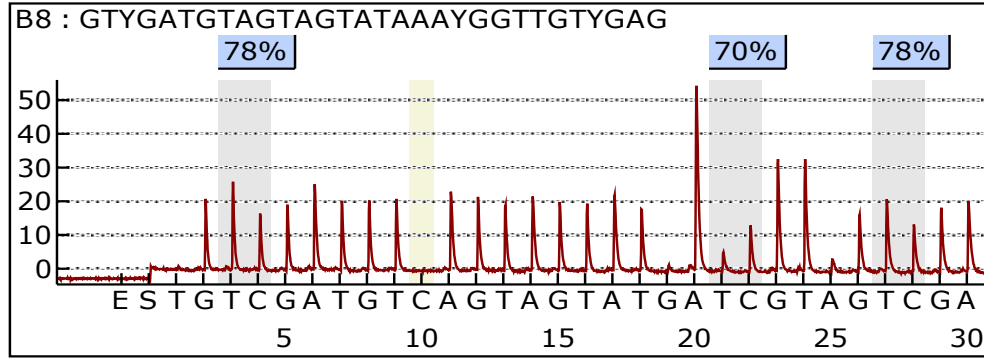

Assay Name: CZ-3  
Sample ID: 54  
Note:

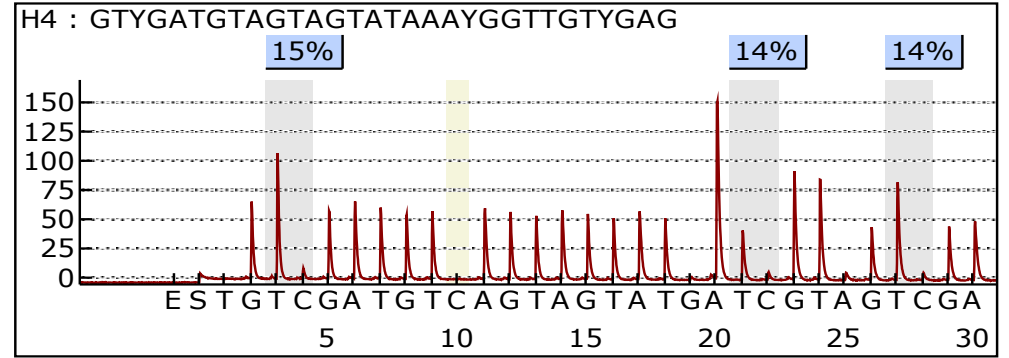

Assay Name: CZ-3  
Sample ID: 52  
Note:

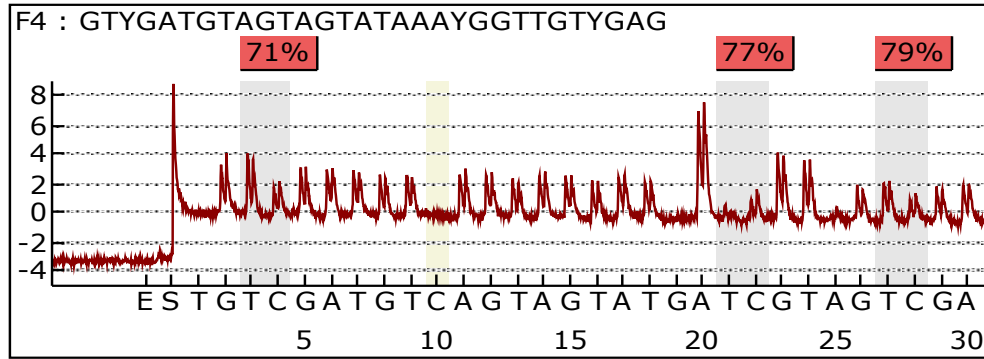

Assay Name: CZ-3  
Sample ID: 55  
Note:

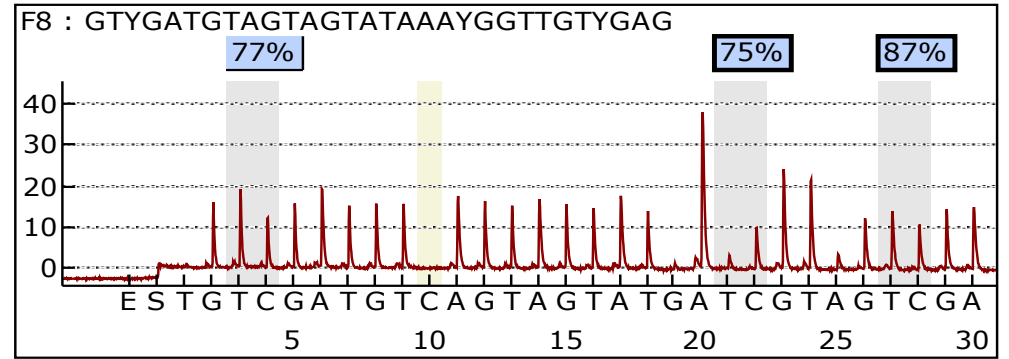

Assay Name: CZ-3  
Sample ID: 53  
Note:

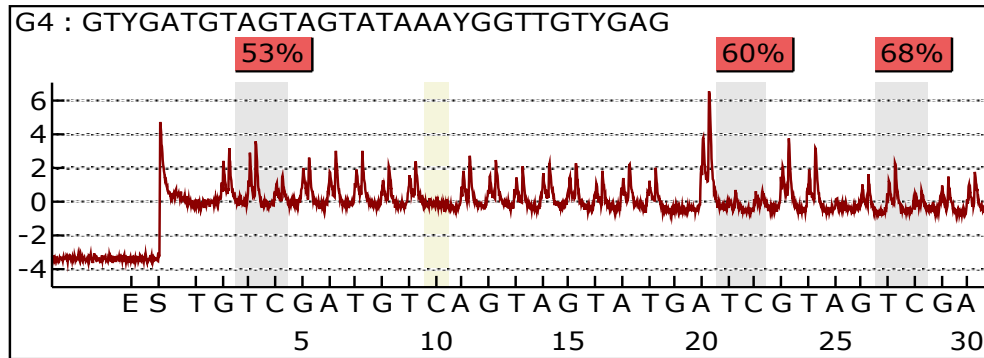

Supplement: oncotarget-06-40611-s007.pdf [file oncotarget-06-40611-s007.pdf]
