# Supplementary material for: Identification of specific DNA methylation sites on the Y-chromosome as biomarker in prostate cancer
Source: PubMed Central journal article supplement (PMC4747356; doi:10.18632/oncotarget.6141), 2015-10-16
Supplement: oncotarget-06-40611-s001.pdf [file oncotarget-06-40611-s001.pdf]

# Identification of specific DNA methylation sites on the Y-chromosome as biomarker in prostate cancer

## Supplementary Material

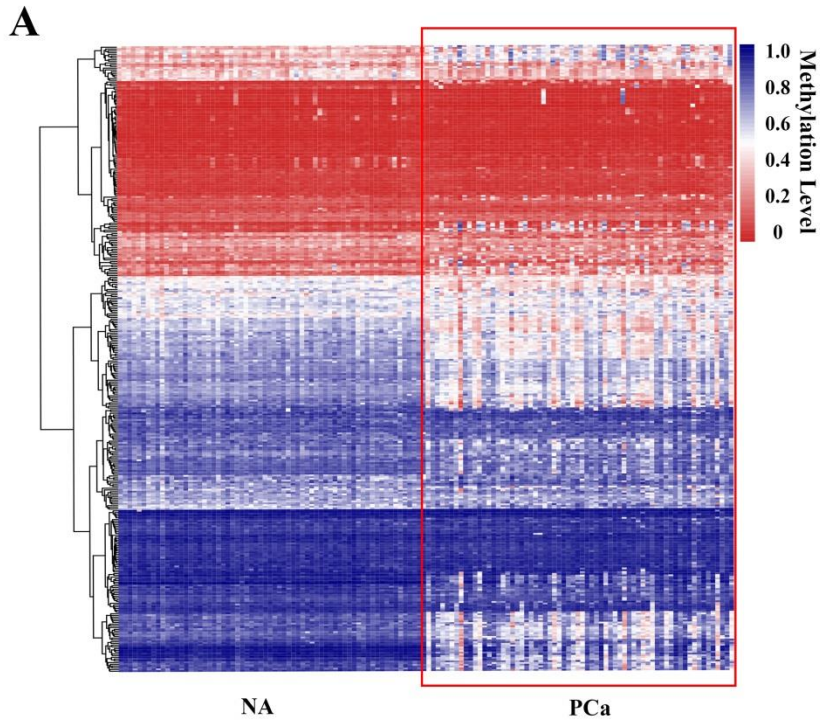

Figure S1. Heat map of the DNA methylation levels of the Y-chromosome in PCa and normal adjacent tissues.

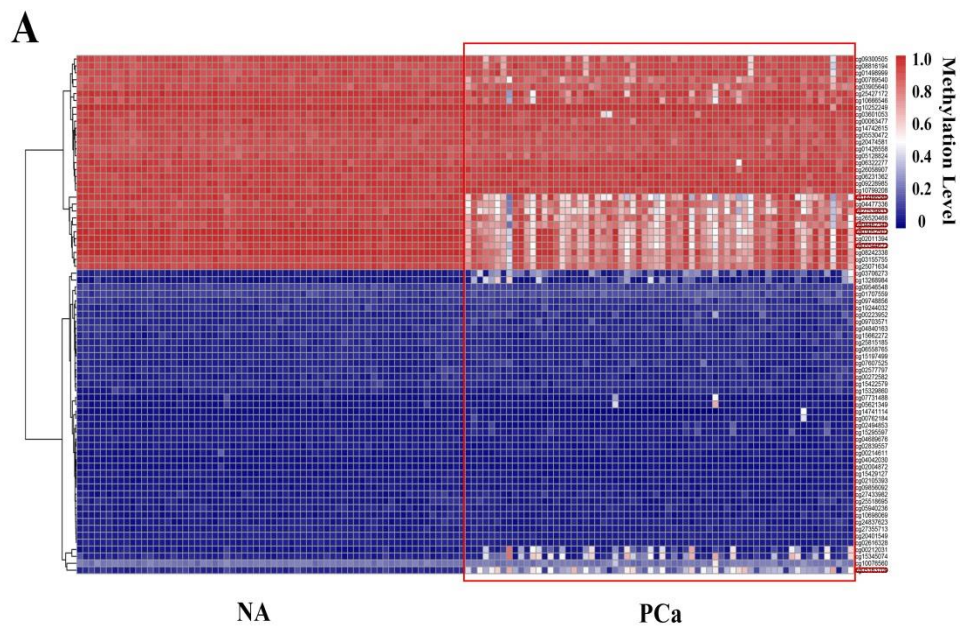

**Figure S2.** Heat map of DNA methylation levels of the 75 conservative methylated sites on the Y-chromosome in adjacent normal tissues and PCa tissues. Six sites that differed markedly in PCa ( $|\Delta \beta\text{-value}| \geq 0.2$ ,  $p < 0.01$ , FDR-adjusted  $p < 0.01$ ) are marked by red boxes.

A

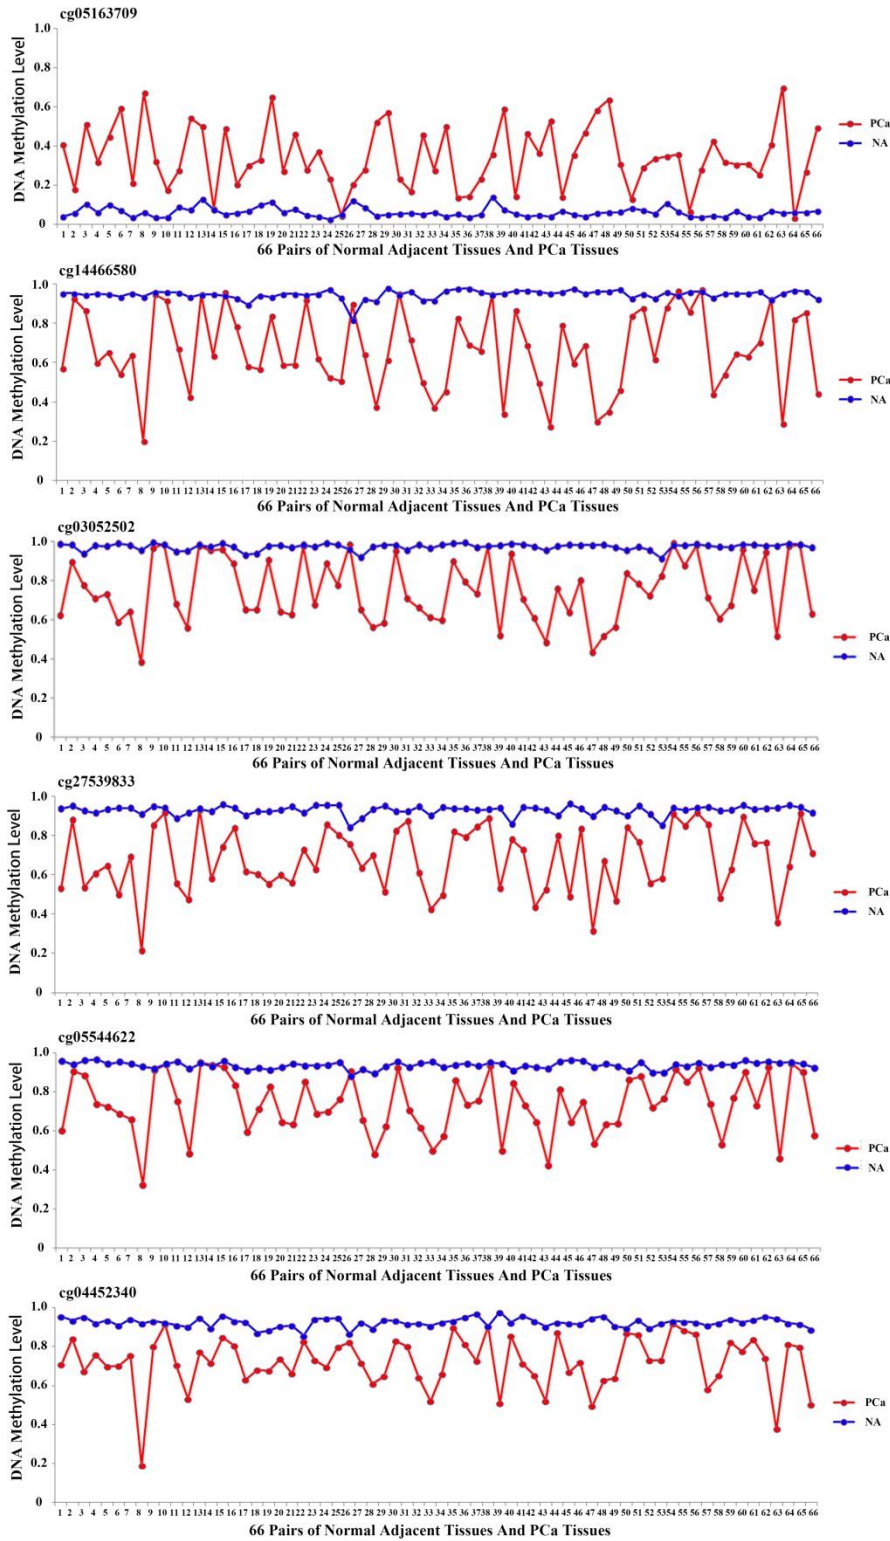

**Figure S3.** The methylation patterns at cg05163709, cg14466580, cg03052502, cg27539833, cg05544622 and cg04452340 within the 66 pairs of PCa and adjacent normal tissues.

**Table S1. Sample Information**

**Table S2. Detail information of the 37 clear differentiation methylated sites**

**Table S3. Detective mutation on Y-chromosome**

**Table S4. Clinical characteristics of the current study cohort**
