# Supplementary material for: Identification of specific DNA methylation sites on the Y-chromosome as biomarker in prostate cancer
Source: PubMed Central journal article supplement (PMC4747356; doi:10.18632/oncotarget.6141), 2015-10-16
Supplement: oncotarget-06-40611-s003.pdf [file oncotarget-06-40611-s003.pdf]

**Table S2: Detail information of the 37 clear differentiation methylated sites**

| Target ID  | P-Value  | Adjust Pval | Beta-Difference | Mean_PCa | Mean_NA  |
|------------|----------|-------------|-----------------|----------|----------|
| cg00050873 | 1.81E-20 | 1.29E-18    | -0.25099        | 0.588091 | 0.839082 |
| cg00213748 | 5.73E-13 | 2.96E-12    | -0.25861        | 0.495787 | 0.754396 |
| cg00639218 | 3.58E-14 | 2.09E-13    | -0.21337        | 0.433489 | 0.646864 |
| cg01053349 | 2.18E-17 | 3.02E-16    | -0.21901        | 0.48418  | 0.703186 |
| cg01828798 | 7.73E-13 | 3.77E-12    | -0.20812        | 0.369871 | 0.577989 |
| cg02107461 | 2.17E-16 | 2.08E-15    | -0.25113        | 0.413306 | 0.664438 |
| cg03052502 | 3.59E-15 | 3.21E-14    | -0.22197        | 0.750654 | 0.972621 |
| cg03443143 | 3.02E-20 | 1.53E-18    | -0.24604        | 0.6381   | 0.88414  |
| cg03515901 | 1.65E-14 | 1.03E-13    | -0.21875        | 0.576753 | 0.795507 |
| cg03535417 | 1.51E-17 | 1.92E-16    | -0.21705        | 0.537956 | 0.755008 |
| cg04169747 | 3.28E-16 | 2.92E-15    | 0.207478        | 0.471101 | 0.263622 |
| cg04193779 | 7.15E-17 | 7.71E-16    | -0.24958        | 0.582323 | 0.831906 |
| cg04462340 | 1.23E-21 | 2.37E-19    | -0.20581        | 0.718943 | 0.924757 |
| cg04831594 | 1.15E-15 | 8.33E-15    | -0.26474        | 0.486659 | 0.751395 |
| cg05163709 | 2.66E-20 | 1.53E-18    | 0.284045        | 0.345909 | 0.061864 |
| cg05202434 | 4.27E-16 | 3.38E-15    | -0.20136        | 0.399125 | 0.60048  |
| cg05367916 | 4.03E-19 | 1.02E-17    | -0.20044        | 0.48617  | 0.686613 |
| cg05378695 | 1.05E-15 | 7.75E-15    | -0.20119        | 0.485708 | 0.686894 |
| cg05544622 | 6.31E-18 | 9.36E-17    | -0.20167        | 0.734588 | 0.936261 |
| cg05618150 | 8.13E-20 | 3.62E-18    | 0.398152        | 0.522938 | 0.124787 |
| cg06587955 | 1.55E-19 | 5.03E-18    | -0.22887        | 0.469923 | 0.698798 |
| cg08053115 | 7.70E-18 | 1.05E-16    | -0.24167        | 0.421897 | 0.663564 |
| cg09197443 | 2.17E-19 | 6.43E-18    | -0.26902        | 0.581374 | 0.850395 |
| cg09350919 | 2.14E-18 | 3.81E-17    | -0.28899        | 0.638478 | 0.927467 |
| cg10363397 | 3.51E-15 | 2.32E-14    | 0.221628        | 0.697724 | 0.476096 |
| cg11684211 | 9.97E-10 | 3.38E-09    | 0.252769        | 0.337722 | 0.084954 |
| cg11816202 | 6.83E-06 | 1.53E-05    | 0.219845        | 0.322149 | 0.102305 |

---

|            |          |          |          |          |          |
|------------|----------|----------|----------|----------|----------|
| cg13419214 | 3.17E-17 | 3.53E-16 | -0.22683 | 0.536446 | 0.763279 |
| cg13654344 | 8.42E-19 | 1.67E-17 | 0.219623 | 0.515471 | 0.295847 |
| cg13884608 | 7.02E-16 | 2.67E-15 | -0.24281 | 0.584861 | 0.82767  |
| cg14466580 | 2.23E-17 | 2.65E-16 | -0.28341 | 0.663387 | 0.946797 |
| cg15810474 | 1.41E-21 | 2.37E-19 | -0.25502 | 0.488716 | 0.743734 |
| cg17651935 | 3.54E-16 | 3.04E-15 | -0.21674 | 0.656364 | 0.873103 |
| cg17834650 | 5.60E-18 | 8.67E-17 | -0.22405 | 0.591995 | 0.816048 |
| cg17837162 | 1.91E-17 | 2.34E-16 | -0.26921 | 0.565639 | 0.83485  |
| cg27325772 | 1.26E-19 | 4.68E-18 | -0.21646 | 0.412031 | 0.628489 |
| cg27539833 | 5.21E-21 | 4.63E-19 | -0.25101 | 0.67675  | 0.927762 |

---
