# Supplementary material for: Identification of specific DNA methylation sites on the Y-chromosome as biomarker in prostate cancer
Source: PubMed Central journal article supplement (PMC4747356; doi:10.18632/oncotarget.6141), 2015-10-16
Supplement: oncotarget-06-40611-s004.pdf [file oncotarget-06-40611-s004.pdf]

**Table S3: Detective mutation on Y-chromosome**

| sample | Chrom | Pos      | Ref | Alt | Func   | Gene_Symbol | Gene_ID      | Strand | ExonicFunc | AChange  |
|--------|-------|----------|-----|-----|--------|-------------|--------------|--------|------------|----------|
| CH17   | chrY  | 16866272 | A   | G   | intron | NLGN4Y      | NM_001206850 | +      |            |          |
| CH23   | chrY  | 5015786  | G   | A   | intron | PCDH11Y     | NM_032973    | +      |            |          |
| CH24   | chrY  | 16755955 | T   | C   | intron | NLGN4Y      | NM_001164238 | +      |            |          |
| CH24   | chrY  | 21897200 | G   | A   | intron | KDM5D       | NM_001146706 | -      |            |          |
| CH25   | chrY  | 22919727 | A   | G   | intron | RPS4Y2      | NM_001039567 | +      |            |          |
| CH29   | chrY  | 5491017  | C   | T   | intron | PCDH11Y     | NM_032973    | +      |            |          |
| CH31   | chrY  | 2816927  | T   | G   | intron | ZFY         | NM_003411    | +      |            |          |
| CH31   | chrY  | 15027029 | T   | A   | CDS    | DDX3Y       | NM_004660    | +      | missense   | c.909T>A |
| CH31   | chrY  | 15027047 | G   | A   | CDS    | DDX3Y       | NM_004660    | +      | synonymous | c.927G>A |
| CH32   | chrY  | 5272877  | T   | A   | intron | PCDH11Y     | NM_032973    | +      |            |          |
| CH32   | chrY  | 6904106  | C   | T   | intron | TBL1Y       | NM_134259    | +      |            |          |
| CH34   | chrY  | 14924654 | A   | T   | intron | USP9Y       | NM_004654    | +      |            |          |
| CH39   | chrY  | 5352819  | T   | C   | intron | PCDH11Y     | NM_032973    | +      |            |          |
| CH41   | chrY  | 15408022 | G   | A   | intron | UTY         | NM_001258267 | -      |            |          |
| CH42   | chrY  | 24495863 | C   | A   | intron | RBMY1F      | NM_152585    | +      |            |          |
| CH49   | chrY  | 5569499  | C   | G   | intron | PCDH11Y     | NM_032973    | +      |            |          |
| CH50   | chrY  | 15366272 | T   | C   | intron | UTY         | NM_001258267 | -      |            |          |
| CH50   | chrY  | 16699249 | A   | G   | intron | NLGN4Y      | NM_001206850 | +      |            |          |
| CH51   | chrY  | 22929411 | C   | A   | intron | RPS4Y2      | NM_001039567 | +      |            |          |
| CH54   | chrY  | 4913665  | C   | T   | intron | PCDH11Y     | NM_032971    | +      |            |          |
| CH54   | chrY  | 5350184  | G   | T   | intron | PCDH11Y     | NM_032973    | +      |            |          |
| CH54   | chrY  | 16863783 | C   | A   | intron | NLGN4Y      | NM_001206850 | +      |            |          |
| CH57   | chrY  | 16761549 | A   | G   | intron | NLGN4Y      | NM_001164238 | +      |            |          |
| CH59   | chrY  | 5286262  | C   | T   | intron | PCDH11Y     | NM_032973    | +      |            |          |
| CH64   | chrY  | 5291896  | A   | G   | intron | PCDH11Y     | NM_032973    | +      |            |          |

| sample | Chrom | Pos      | Ref | Alt | Func   | Gene_Symbol | Gene_ID      | Strand | ExonicFunc | AChange |
|--------|-------|----------|-----|-----|--------|-------------|--------------|--------|------------|---------|
| CH72   | chrY  | 5425632  | A   | T   | intron | PCDH11Y     | NM_032973    | +      |            |         |
| CH73   | chrY  | 5240341  | C   | A   | intron | PCDH11Y     | NM_032973    | +      |            |         |
| CH77   | chrY  | 5457519  | G   | C   | intron | PCDH11Y     | NM_032973    | +      |            |         |
| CH78   | chrY  | 15402893 | C   | G   | intron | UTY         | NM_001258267 | -      |            |         |
| CH78   | chrY  | 16696272 | T   | C   | intron | NLGN4Y      | NM_001206850 | +      |            |         |
