# Supplementary material for: Identification of specific DNA methylation sites on the Y-chromosome as biomarker in prostate cancer
Source: PubMed Central journal article supplement (PMC4747356; doi:10.18632/oncotarget.6141), 2015-10-16
Supplement: oncotarget-06-40611-s005.pdf [file oncotarget-06-40611-s005.pdf]

**Table S4: Clinical characteristics of the current study cohort**

| Parameter                     | Entire cohort    |                  |                     |                   |
|-------------------------------|------------------|------------------|---------------------|-------------------|
|                               | Negative<br>n=73 | Positive<br>n=62 | p value             | Overall<br>n=135  |
| Age, yr                       |                  |                  | <0.083 <sup>*</sup> |                   |
| No. pts (%)                   | 73(54.1)         | 62(45.9)         |                     | 135 (100.0)       |
| Mean±SD                       | 64.6±7.8         | 66.8±6.8         |                     | 65.6±7.4          |
| tPSA, ng/ml                   |                  |                  | <0.001 <sup>#</sup> |                   |
| No. pts (%)                   | 73(54.1)         | 62(45.9)         |                     | 135 (100.0)       |
| Median[IQR]                   | 9.2[6.6-12.7]    | 18.1[10.-48.9]   |                     | 11.3[7.5 - 20.6]  |
| Volume, ml                    |                  |                  | <0.013 <sup>#</sup> |                   |
| No. pts (%)                   | 73(54.1)         | 62(45.9)         |                     | 135 (100.0)       |
| Median[IQR]                   | 46.3[31.2-60.2]  | 37.3[30.1-44.2]  |                     | 40.6[30.8 - 56.0] |
| PSAD, ng/ml/cc                |                  |                  | <0.001 <sup>#</sup> |                   |
| No. pts (%)                   | 73(54.1)         | 62(45.9)         |                     | 135 (100.0)       |
| Median[IQR]                   | 0.20[0.13-0.34]  | 0.62[0.24-1.2]   |                     | 0.28[0.16 - 0.62] |
| %fPSA                         |                  |                  | <0.119 <sup>#</sup> |                   |
| No. pts (%)                   | 61(55.5)         | 49(44.5)         |                     | 110(100%)         |
| Median[IQR]                   | 0.15[0.11-0.22]  | 0.12[0.08-0.24]  |                     | 0.14[0.09--0.22]  |
| Suspicious DRE                |                  |                  | 0.014 <sup>§</sup>  |                   |
| No. pts                       | 73(54.1)         | 62(45.9)         |                     | 135 (100.0)       |
| No. %                         | 19(26.0)         | 21(33.9)         |                     | 40(22.2)          |
| cg 05163709                   |                  |                  | <0.001 <sup>#</sup> |                   |
| No. pts (%)                   | 69(55.2)         | 56(44.8)         |                     | 125(100.0)        |
| Median[IQR]                   | 3[2.0-3.0]       | 6[4.0-9.0]       |                     | 4[2-6]            |
| cg27539833                    |                  |                  | <0.001 <sup>#</sup> |                   |
| No. pts (%)                   | 37(48.7)         | 36(33.2)         |                     | 73(100.0)         |
| Median[IQR]                   | 88[80.3-92.0]    | 77[56.0-84.5]    |                     | 84[71.0-90.3]     |
| Biopsy cores                  |                  |                  |                     |                   |
| No. pts (%)                   | 73(54.1)         | 62(45.9)         |                     | 135(100.0)        |
| Median[IQR]                   | 12[12-12]        | 12[12-12]        |                     | 12[12-12]         |
| Positive cores, no.           |                  |                  |                     |                   |
| Median[IQR]                   |                  | 4.5[2.0-8.0]     |                     |                   |
| Biopsy Gleason score, no. (%) |                  |                  |                     |                   |
| ≤ 6                           |                  | 19(30.65)        |                     |                   |
| 7                             |                  | 19(30.65)        |                     |                   |
| ≥ 8                           |                  | 24(38.7)         |                     |                   |

Abbreviations: PSA: prostate-specific antigen; SD: standard deviation; IQR: interquartile range; tPSA: total PSA; PSAD: PSA density (serum PSA/prostate volume); %fPSA: percent free PSA; DRE: digital rectal examination.

<sup>\*</sup>Wilcoxon rank-sum Test. <sup>#</sup>Mann-Whitney U test. <sup>§</sup>Pearson's Chi-square test
